# Supplementary material for: Discovery of Novel Thiosemicarbazides Containing 1,3,5-Triazines Derivatives as Potential Synergists against Fluconazole-Resistant Candida albicans
Source: MDPI journal article supplement (doi:10.3390/pharmaceutics14112334), 2022-10-29
Supplement: s1 [file s1]

# Discovery of Novel Thiosemicarbazides Containing 1,3,5-Triazines Derivatives as Potential Synergists against Fluconazole-Resistant *Candida albicans*

Fei Xie <sup>1,†</sup>, Yumeng Hao <sup>1,†</sup>, Jiacun Liu <sup>2,†</sup>, Junhe Bao <sup>1</sup>, Tingjunhong Ni <sup>3</sup>, Yu Liu <sup>2</sup>, Xiaochen Chi <sup>4</sup>, Ting Wang <sup>1</sup>, Shichong Yu <sup>1</sup>, Yongsheng Jin <sup>1</sup>, Liping Li <sup>3</sup>, Dazhi Zhang <sup>1,\*</sup> and Lan Yan <sup>2,\*</sup>

<sup>1</sup> Department of Organic Chemistry, School of Pharmacy, Naval Medical University, No. 325 Guohe Road, Shanghai 200433, China

<sup>2</sup> Center of New Drug Research, School of Pharmacy, Naval Medical University, No. 325 Guohe Road, Shanghai 200433, China

<sup>3</sup> Department of Pharmacy, Shanghai Tenth People's Hospital, School of Medicine, Tongji University, No. 1239 Siping Road, Shanghai 200092, China

<sup>4</sup> School of Traditional Chinese Materia Medica, Shenyang Pharmaceutical University, No. 103 Wenhua Road, Shenyang 110016, China

\* Correspondence: zdzhang\_yjhx@smmu.edu.cn (D.Z.); ylangsmmu@sina.com (L.Y.)

† These authors contributed equally to this work.

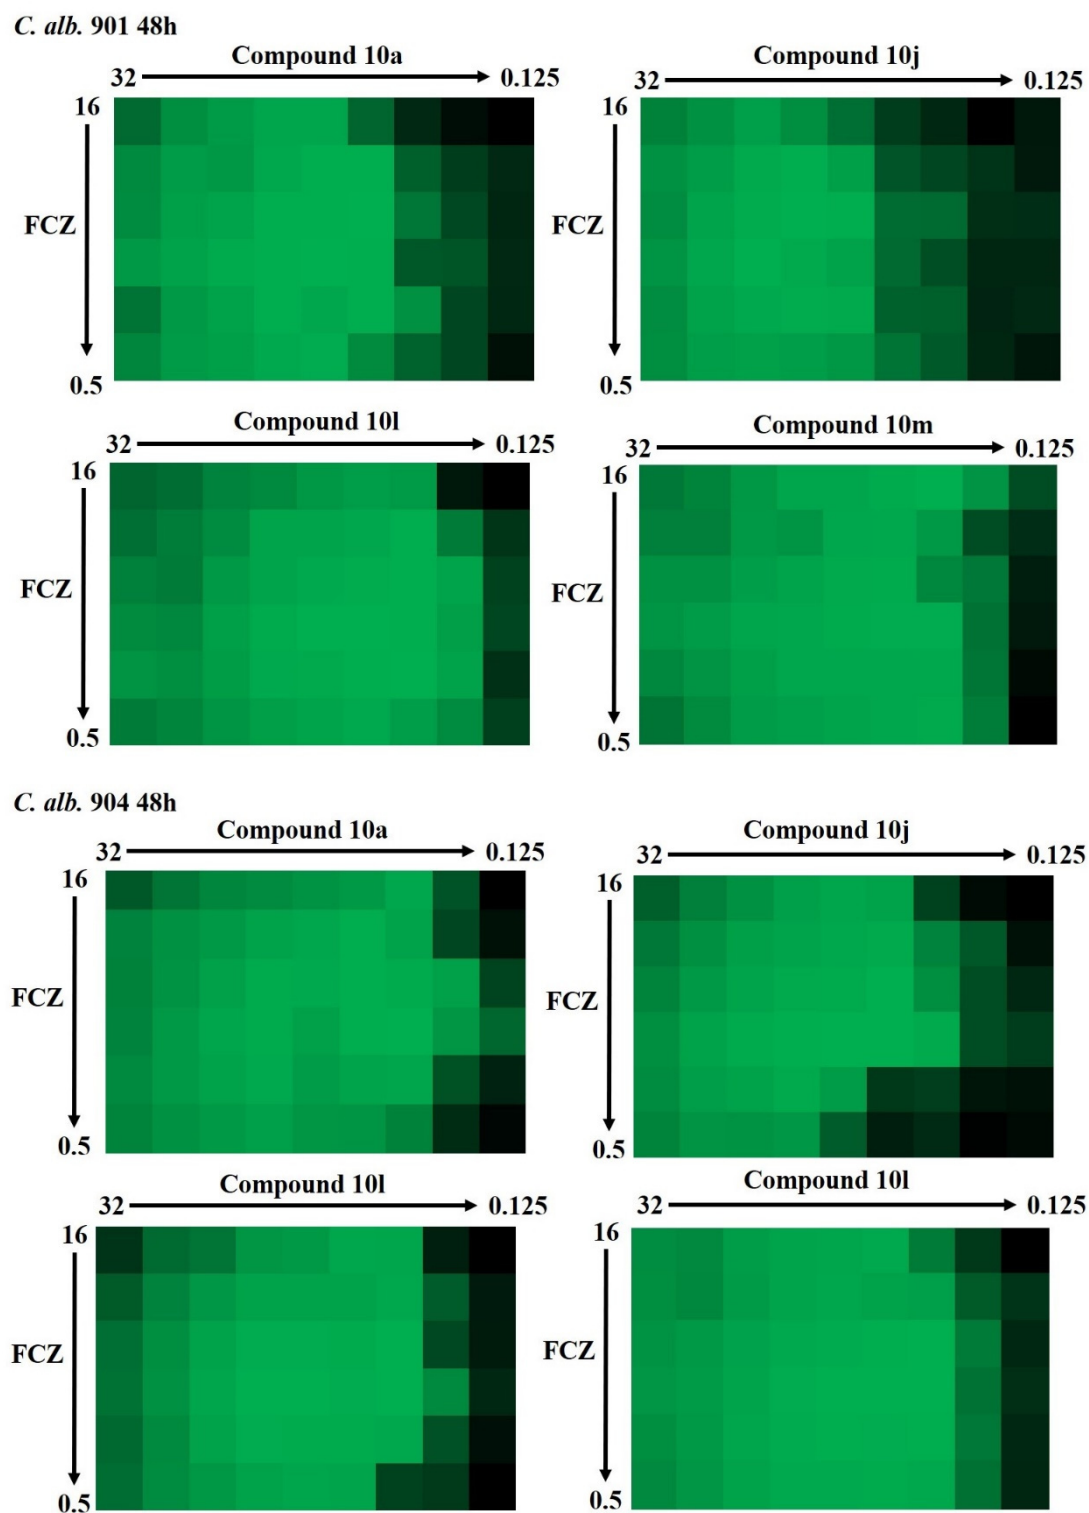

**Figure S1.** Checkerboard microdilution assay of FCZ with the target compounds **10a**, **10j**, **10l** and **10m**. The *in vitro* synergistic antifungal activity was shown in heat map. The color changes from green to black were used to express the relative growth of the fungi, if the color was greener, the inhibition was stronger. Abbreviations: *C. alb.*, *Candida albicans*; FCZ, fluconazole.

**Table S1.** Antifungal activity of compound **10l** against 8 *Cryptococcus* strains (MIC<sub>80</sub>, µg/mL, 72h)

| Species               | Strains | FCZ  | 8    | 10l    |
|-----------------------|---------|------|------|--------|
| <i>C. neoformans.</i> | HN-15   | 16.0 | 16.0 | >64.0  |
| <i>C. neoformans.</i> | HN-17   | 8.0  | 16.0 | 0.25   |
| <i>C. neoformans.</i> | HN-19   | 16.0 | 16.0 | 0.5    |
| <i>C. neoformans.</i> | HN-20   | 8.0  | 32.0 | 0.5    |
| <i>C. neoformans.</i> | HN-68   | 4.0  | 16.0 | ≤0.125 |
| <i>C. neoformans.</i> | BJ-3    | 8.0  | 32.0 | ≤0.125 |
| <i>C. neoformans.</i> | BJ-72   | 16.0 | 16.0 | 0.25   |
| <i>C. neoformans.</i> | BJ-95   | 4.0  | 16.0 | ≤0.125 |

Abbreviations: *C. neoformans.*, *Cryptococcus neoformans*; FCZ, fluconazole.

The characterization data of the compounds are given below:

1. *2-(4-((4-((cyclohexylmethyl)amino)-6-((4-fluorobenzyl)amino)-1,3,5-triazin-2-yl)amino)phenyl)-N-(2-fluorophenyl)acetamide (8b)*  
White solid, yield: 65.2%; <sup>1</sup>H NMR (300 MHz, DMSO-*d*<sub>6</sub>) δ 9.88 (s, 1H), 8.85 (dd, *J* = 45.5, 18.0 Hz, 1H), 7.85 (t, *J* = 8.8 Hz, 1H), 7.74 – 7.54 (m, 2H), 7.52 – 7.06 (m, 10H), 6.87 (t, *J* = 33.9 Hz, 1H), 4.44 (d, *J* = 5.1 Hz, 2H), 3.63 (s, 2H), 3.14 – 2.98 (m, 2H), 1.78 – 1.38 (m, 6H), 1.15 – 1.07 (m, 3H), 0.96 – 0.67 (m, 2H). <sup>13</sup>C NMR (75 MHz, DMSO-*d*<sub>6</sub>) δ 170.34, 166.13, 165.99, 164.47, 163.06, 159.85, 155.74, 152.49, 139.66, 137.31, 129.40, 129.29, 128.94, 126.72, 126.57, 125.74, 125.64, 124.77, 124.72, 124.62, 120.24, 119.85, 116.03, 115.77, 115.40, 115.12, 46.98, 46.63, 43.18, 42.85, 42.49, 37.94, 31.07, 26.64, 25.92. MS (ESI) *m/z*: 558.0[M+H]<sup>+</sup>, C<sub>31</sub>H<sub>33</sub>F<sub>2</sub>N<sub>7</sub>O. Purity: 97.4% (LC-MS).
2. *2-(4-((4-((cyclohexylmethyl)amino)-6-((4-fluorobenzyl)amino)-1,3,5-triazin-2-yl)amino)phenyl)-N-(3-fluorophenyl)acetamide (8c)*  
White solid, yield: 60.1%; <sup>1</sup>H NMR (300 MHz, DMSO-*d*<sub>6</sub>) δ 10.31 (s, 1H), 8.95 – 8.65 (m, 1H), 7.80 – 7.54 (m, 3H), 7.46 – 7.04 (m, 9H), 7.02 – 6.65 (m, 2H), 4.43 (s, 2H), 3.55 (s, 2H), 3.08 (s, 2H), 1.78 – 1.30 (m, 6H), 1.29 – 1.00 (d, *J* = 24.4 Hz, 3H), 0.97 – 0.66 (m, 2H). <sup>13</sup>C NMR (75 MHz, DMSO-*d*<sub>6</sub>) δ 170.32, 166.46, 166.28, 166.17, 164.55, 164.19, 163.05, 161.00, 159.84, 141.54, 141.39, 139.81, 137.33, 130.85, 130.73, 129.41, 129.27, 128.65, 120.22, 119.86, 115.38, 115.27, 115.10, 110.18, 109.90, 106.46, 106.11, 46.93, 46.61, 43.22, 37.91, 31.07, 26.64, 25.92. MS (ESI) *m/z*: 558.0[M+H]<sup>+</sup>, C<sub>31</sub>H<sub>33</sub>F<sub>2</sub>N<sub>7</sub>O. Purity: 98.8% (LC-MS).
3. *2-(4-((4-((cyclohexylmethyl)amino)-6-((4-fluorobenzyl)amino)-1,3,5-triazin-2-yl)amino)phenyl)-N-(4-fluorophenyl)acetamide (8d)*  
White solid, yield: 64.3%; <sup>1</sup>H NMR (300 MHz, DMSO-*d*<sub>6</sub>) δ 10.15 (s, 1H), 8.97 – 8.64 (m, 1H), 7.80 – 7.54 (m, 4H), 7.47 – 7.02 (m, 9H), 6.83 (t, *J* = 34.5 Hz, 1H), 4.43 (s, 2H), 3.53 (s, 2H), 3.17 – 2.96 (m, 2H), 1.78 – 1.30 (m, 6H), 1.22 – 1.01 (m, 3H), 0.98 – 0.67 (m, 2H). <sup>13</sup>C NMR (75 MHz, DMSO-*d*<sub>6</sub>) δ 169.81, 166.41, 166.29, 166.12, 164.55, 163.03, 159.96, 159.85, 156.78, 156.51, 139.82, 137.35, 136.16, 129.41, 129.23, 128.90, 121.32, 121.21, 119.86, 115.84, 115.55, 115.39, 115.11, 47.07, 46.61, 43.12, 37.89, 31.06, 26.64, 25.92. MS (ESI) *m/z*: 558.0[M+H]<sup>+</sup>, C<sub>31</sub>H<sub>33</sub>F<sub>2</sub>N<sub>7</sub>O. Purity: 99.1% (LC-MS).
4. *2-(4-((4-((cyclohexylmethyl)amino)-6-((4-fluorobenzyl)amino)-1,3,5-triazin-2-yl)amino)phenyl)-N-(4-methoxyphenyl)acetamide (8e)*  
White solid, yield: 54.6%; <sup>1</sup>H NMR (300 MHz, DMSO-*d*<sub>6</sub>) δ 9.95 (s, 1H), 8.91 – 8.71 (m, 1H), 7.79 – 7.56 (m, 2H), 7.49 (d, *J* = 8.9 Hz, 2H), 7.42 – 7.05 (m, 7H), 7.03 – 6.65 (m, 3H), 4.44 (d, *J* = 5.4 Hz, 2H), 3.70 (s, 3H), 3.50 (s, 2H), 3.10 – 3.02 (m, 2H), 1.78 – 1.34 (m, 6H), 1.38 – 1.06 (m, 3H), 0.96 – 0.68 (m, 2H). <sup>13</sup>C NMR (75 MHz, DMSO-*d*<sub>6</sub>) δ 169.39, 166.38, 166.29, 166.20, 166.16, 164.58, 163.06, 159.86, 155.60, 139.65, 137.37, 132.93, 129.41, 129.30, 129.19, 121.10, 120.30, 120.23, 120.11, 119.92, 119.83, 115.39, 115.11, 114.28, 55.61, 46.67, 43.12, 37.88, 31.07, 26.64, 25.93. MS (ESI) *m/z*: 570.0[M+H]<sup>+</sup>, C<sub>32</sub>H<sub>36</sub>FN<sub>7</sub>O<sub>2</sub>. Purity: 98.8% (LC-MS).
5. *2-(4-((4-((cyclohexylmethyl)amino)-6-((4-fluorobenzyl)amino)-1,3,5-triazin-2-yl)amino)phenyl)-N-(4-(2-methoxyethoxy)phenyl)acetamide (8f)*  
White solid, yield: 48.7%; <sup>1</sup>H NMR (300 MHz, DMSO-*d*<sub>6</sub>) δ 9.95 (s, 1H), 8.97 – 8.65 (m, 1H), 7.77 – 7.54 (m, 2H), 7.48 (d, *J* = 8.9 Hz, 2H), 7.22 (dt, *J* = 17.1, 8.1 Hz, 7H), 7.03 – 6.64 (m, 3H), 4.44 (d, *J* = 6.2 Hz, 2H), 4.12 – 3.92 (m, 2H), 3.70 – 3.56 (m, 2H), 3.49 (s, 2H), 3.29 (s,



3H), 3.10 – 3.02 (m, 2H), 1.73 – 1.59 (m, 6H), 1.19 – 1.07 (m, 3H), 0.93 – 0.75 (m, 2H). <sup>13</sup>C NMR (75 MHz, DMSO-*d*<sub>6</sub>) δ 169.40, 166.30, 164.58, 163.06, 159.86, 154.79, 139.66, 137.37, 133.02, 129.41, 129.31, 129.18, 121.08, 119.84, 115.38, 115.10, 114.90, 70.90, 67.48, 58.61, 46.96, 46.64, 43.14, 37.92, 31.07, 26.65, 25.92. MS (ESI) *m/z*: 614.0[M+H]<sup>+</sup>, C<sub>34</sub>H<sub>40</sub>FN<sub>7</sub>O<sub>3</sub>. Purity: 97.5% (LC-MS).

6. 2-(4-((4-((cyclohexylmethyl)amino)-6-((4-fluorobenzyl)amino)-1,3,5-triazin-2-yl)amino)phenyl)-N-(4-fluorobenzyl)acetamide (**8g**)

White solid, yield: 66.4%; <sup>1</sup>H NMR (300 MHz, DMSO-*d*<sub>6</sub>) δ 8.96 – 8.65 (m, 1H), 8.47 (s, 1H), 7.78 – 7.52 (m, 2H), 7.46 – 7.21 (m, 5H), 7.20 – 7.02 (m, 6H), 6.84 (t, *J* = 35.7 Hz, 1H), 4.44 (s, 2H), 4.24 (d, *J* = 5.3 Hz, 2H), 3.38 (s, 2H), 3.13 – 2.96 (m, 2H), 1.80 – 1.33 (m, 6H), 1.26 – 1.00 (m, 3H), 0.98 – 0.67 (m, 2H). <sup>13</sup>C NMR (75 MHz, DMSO-*d*<sub>6</sub>) δ 170.96, 166.42, 166.29, 166.18, 164.56, 163.21, 163.06, 160.00, 159.86, 139.55, 137.57, 137.38, 136.24, 136.20, 129.67, 129.56, 129.41, 129.35, 129.17, 120.16, 119.74, 115.55, 115.39, 115.27, 115.10, 46.95, 46.66, 43.27, 43.12, 42.96, 42.24, 41.95, 38.07, 37.91, 31.07, 26.65, 25.93. MS (ESI) *m/z*: 572.0[M+H]<sup>+</sup>, C<sub>32</sub>H<sub>35</sub>F<sub>2</sub>N<sub>7</sub>O. Purity: 97.3% (LC-MS).

7. 2-(4-((4-((cyclohexylmethyl)amino)-6-((4-fluorobenzyl)amino)-1,3,5-triazin-2-yl)amino)phenyl)-N-(4-methylbenzyl)acetamide (**8h**)

White solid, yield: 62.8%; <sup>1</sup>H NMR (300 MHz, DMSO-*d*<sub>6</sub>) δ 8.92 – 8.71 (m, 1H), 8.43 (t, *J* = 5.8 Hz, 1H), 7.78 – 7.53 (m, 2H), 7.45 – 7.03 (m, 11H), 6.86 (t, *J* = 35.4 Hz, 1H), 4.45 (d, *J* = 5.4 Hz, 2H), 4.21 (d, *J* = 5.8 Hz, 2H), 3.38 (s, 2H), 3.15 – 2.99 (m, 2H), 2.26 (s, 3H), 1.77 – 1.50 (m, 6H), 1.17 – 1.14 (m, 3H), 0.98 – 0.73 (m, 2H). <sup>13</sup>C NMR (75 MHz, DMSO-*d*<sub>6</sub>) δ 170.85, 166.44, 166.31, 166.19, 164.57, 163.07, 159.87, 139.55, 137.37, 136.95, 136.22, 129.46, 129.24, 129.17, 127.66, 120.16, 120.03, 119.96, 119.71, 115.39, 115.11, 46.96, 46.63, 43.23, 42.97, 42.40, 42.27, 37.94, 31.08, 26.66, 25.93, 21.10. MS (ESI) *m/z*: 568.0[M+H]<sup>+</sup>, C<sub>33</sub>H<sub>38</sub>FN<sub>7</sub>O. Purity: 97.6% (LC-MS).

8. 2-(4-((4-((cyclohexylmethyl)amino)-6-((4-fluorobenzyl)amino)-1,3,5-triazin-2-yl)amino)phenyl)-N-(furan-2-ylmethyl)acetamide (**8i**)

White solid, yield: 70.1%; <sup>1</sup>H NMR (300 MHz, DMSO-*d*<sub>6</sub>) δ 9.00 – 8.42 (m, 1H), 8.44 (t, *J* = 5.1 Hz, 1H), 7.69 – 7.56 (m, 3H), 7.40 – 7.09 (m, 7H), 6.84 (t, *J* = 34.6 Hz, 1H), 6.37 (s, 1H), 6.19 (d, *J* = 2.3 Hz, 1H), 4.44 (d, *J* = 4.3 Hz, 2H), 4.24 (d, *J* = 5.4 Hz, 2H), 3.35 (s, 2H), 3.18 – 2.94 (m, 2H), 1.74 – 1.59 (m, 6H), 1.19 – 1.07 (m, 3H), 0.94 – 0.76 (m, 2H). <sup>13</sup>C NMR (75 MHz, DMSO-*d*<sub>6</sub>) δ 170.80, 166.28, 166.15, 164.54, 163.07, 159.86, 152.81, 142.51, 139.52, 137.35, 129.42, 129.30, 129.17, 120.15, 119.96, 119.71, 115.39, 115.11, 110.87, 107.16, 46.95, 46.65, 43.22, 42.97, 42.06, 37.92, 36.05, 31.07, 26.66, 25.93. MS (ESI) *m/z*: 544.0[M+H]<sup>+</sup>, C<sub>30</sub>H<sub>34</sub>FN<sub>7</sub>O<sub>2</sub>. Purity: 97.2% (LC-MS).

9. 2-(4-((4-((cyclohexylmethyl)amino)-6-((4-fluorobenzyl)amino)-1,3,5-triazin-2-yl)amino)phenyl)-N-((5-phenylfuran-2-yl)methyl)acetamide (**8g**)

White solid, yield: 62.4%; <sup>1</sup>H NMR (300 MHz, DMSO-*d*<sub>6</sub>) δ 8.98 – 8.66 (m, 1H), 8.52 (s, 1H), 7.80 – 7.53 (m, 4H), 7.49 – 7.02 (m, 10H), 7.00 – 6.65 (m, 2H), 6.30 (d, *J* = 2.6 Hz, 1H), 4.43 (s, 2H), 4.32 (d, *J* = 4.7 Hz, 2H), 3.39 (s, 2H), 3.14 – 2.97 (m, 2H), 1.81 – 1.34 (m, 6H), 1.29 – 1.01 (m, 3H), 0.98 – 0.68 (m, 2H). <sup>13</sup>C NMR (75 MHz, DMSO-*d*<sub>6</sub>) δ 170.92, 166.42, 166.31, 166.18, 164.58, 163.06, 159.86, 152.75, 152.59, 139.59, 137.37, 130.78, 129.42, 129.28, 129.17, 127.71, 123.65, 120.13, 119.75, 115.38, 115.11, 109.37, 106.92, 46.95, 46.64, 43.21, 43.00, 42.12, 37.94, 36.28, 31.07, 26.65, 25.92. MS (ESI) *m/z*: 620.0[M+H]<sup>+</sup>, C<sub>36</sub>H<sub>38</sub>FN<sub>7</sub>O<sub>2</sub>. Purity:

97.4% (LC-MS).

10. 2-(2-(4-((4-((cyclohexylmethyl)amino)-6-((4-fluorobenzyl)amino)-1,3,5-triazin-2-yl)amino)phenyl)acetyl)-N-(2-chlorophenyl)hydrazine-1-carboxamide (**9a**)  
White solid, yield: 80.5%; <sup>1</sup>H NMR (300 MHz, DMSO-*d*<sub>6</sub>) δ 10.04 (s, 1H), 8.96 – 8.69 (m, 2H), 8.19 (s, 1H), 8.09 (d, *J* = 8.1 Hz, 1H), 7.80 – 7.56 (m, 2H), 7.47 – 7.22 (m, 5H), 7.14 (s, 4H), 7.01 (t, *J* = 7.4 Hz, 1H), 6.79 (d, *J* = 35.0 Hz, 1H), 4.45 (s, 2H), 3.54 – 3.43 (m, 2H), 3.10 (s, 2H), 1.81 – 1.48 (m, 6H), 1.25 – 1.07 (s, 3H), 0.96 – 0.71 (m, 2H). <sup>13</sup>C NMR (75 MHz, DMSO-*d*<sub>6</sub>) δ 170.81, 166.43, 166.29, 166.16, 164.56, 163.07, 162.77, 159.87, 155.24, 139.70, 137.34, 136.22, 129.64, 129.41, 129.24, 128.53, 128.05, 123.87, 122.43, 121.54, 120.06, 119.67, 115.40, 115.12, 46.92, 46.67, 43.18, 42.97, 37.96, 36.24, 31.08, 26.65, 25.93. MS (ESI) *m/z*: 632.0[M+H]<sup>+</sup>, C<sub>32</sub>H<sub>33</sub>ClFN<sub>9</sub>O<sub>2</sub>. Purity: 97.5% (LC-MS).
11. 2-(2-(4-((4-((cyclohexylmethyl)amino)-6-((4-fluorobenzyl)amino)-1,3,5-triazin-2-yl)amino)phenyl)acetyl)-N-(3-chlorophenyl)hydrazine-1-carboxamide (**9b**)  
White solid, yield: 86.2%; <sup>1</sup>H NMR (300 MHz, DMSO-*d*<sub>6</sub>) δ 9.89 (s, 1H), 8.99 – 8.66 (m, 2H), 8.21 (s, 1H), 7.70 – 7.55 (m, 3H), 7.43 – 7.20 (m, 5H), 7.19 – 7.06 (m, 4H), 7.04 – 6.70 (m, 2H), 4.43 (s, 2H), 3.40 (s, 2H), 3.09 (s, 2H), 1.74 – 1.35 (m, 6H), 1.25 – 1.05 (m, 3H), 0.97 – 0.66 (m, 2H). <sup>13</sup>C NMR (75 MHz, DMSO-*d*<sub>6</sub>) δ 170.91, 166.29, 164.56, 163.07, 159.86, 155.63, 141.71, 139.68, 137.40, 133.52, 130.72, 129.31, 128.61, 121.94, 120.07, 119.69, 118.23, 117.26, 115.40, 115.12, 56.50, 46.97, 46.64, 43.15, 37.94, 31.08, 26.66, 25.93, 19.02. MS (ESI) *m/z*: 631.9[M+H]<sup>+</sup>, C<sub>32</sub>H<sub>33</sub>ClFN<sub>9</sub>O<sub>2</sub>. Purity: 95.9% (LC-MS).
12. 2-(2-(4-((4-((cyclohexylmethyl)amino)-6-((4-fluorobenzyl)amino)-1,3,5-triazin-2-yl)amino)phenyl)acetyl)-N-(4-chlorophenyl)hydrazine-1-carboxamide (**9c**)  
White solid, yield: 80.4%; <sup>1</sup>H NMR (300 MHz, DMSO-*d*<sub>6</sub>) δ 9.88 (s, 1H), 8.96 – 8.67 (m, 2H), 8.14 (s, 1H), 7.81 – 7.55 (m, 2H), 7.48 (d, *J* = 8.6 Hz, 3H), 7.32 (d, *J* = 10.2 Hz, 4H), 7.12 (s, 4H), 6.85 (t, *J* = 33.5 Hz, 1H), 4.44 (s, 2H), 3.40 (s, 2H), 3.17 – 2.95 (s, 2H), 1.79 – 1.40 (m, 6H), 1.23 – 1.06 (m, 3H), 0.97 – 0.67 (m, 2H). <sup>13</sup>C NMR (75 MHz, DMSO-*d*<sub>6</sub>) δ 170.89, 166.30, 164.55, 163.07, 162.97, 155.68, 139.76, 139.13, 137.41, 129.30, 129.09, 128.94, 128.63, 125.99, 125.87, 120.40, 119.65, 115.40, 115.11, 56.50, 46.93, 46.66, 43.32, 42.87, 37.96, 31.08, 26.65, 25.93, 19.02. MS (ESI) *m/z*: 631.9[M+H]<sup>+</sup>, C<sub>32</sub>H<sub>33</sub>ClFN<sub>9</sub>O<sub>2</sub>. Purity: 97.3% (LC-MS).
13. 2-(2-(4-((4-((cyclohexylmethyl)amino)-6-((4-fluorobenzyl)amino)-1,3,5-triazin-2-yl)amino)phenyl)acetyl)-N-(2-fluorophenyl)hydrazine-1-carboxamide (**9d**)  
White solid, yield: 76.3%; <sup>1</sup>H NMR (300 MHz, DMSO-*d*<sub>6</sub>) δ 9.99 (s, 1H), 8.98 – 8.67 (m, 1H), 8.57 (s, 1H), 8.39 (s, 1H), 8.00 (t, *J* = 7.5 Hz, 1H), 7.81 – 7.54 (m, 2H), 7.49 – 7.27 (m, 3H), 7.25 – 7.08 (m, 6H), 7.03 – 6.94 (m, 1H), 6.79 (d, *J* = 32.7 Hz, 1H), 4.44 (s, 2H), 3.40 (s, 2H), 3.18 – 2.97 (m, 2H), 1.84 – 1.39 (m, 6H), 1.29 – 0.99 (m, 3H), 0.98 – 0.65 (m, 2H). <sup>13</sup>C NMR (75 MHz, DMSO-*d*<sub>6</sub>) δ 170.72, 166.43, 166.30, 166.17, 164.56, 163.07, 159.86, 155.37, 154.32, 154.28, 151.11, 139.66, 137.58, 137.37, 129.41, 129.24, 128.59, 127.81, 127.67, 124.92, 124.88, 123.32, 123.22, 121.51, 120.09, 119.99, 119.82, 119.69, 115.62, 115.38, 115.12, 46.97, 46.64, 43.23, 43.03, 37.96, 31.07, 26.65, 25.92. MS (ESI) *m/z*: 615.9[M+H]<sup>+</sup>, C<sub>32</sub>H<sub>35</sub>F<sub>2</sub>N<sub>9</sub>O<sub>2</sub>. Purity: 95.4% (LC-MS).
14. 2-(2-(4-((4-((cyclohexylmethyl)amino)-6-((4-fluorobenzyl)amino)-1,3,5-triazin-2-yl)amino)phenyl)acetyl)-N-(3-fluorophenyl)hydrazine-1-carboxamide (**9e**)  
White solid, yield: 70.4%; <sup>1</sup>H NMR (300 MHz, DMSO-*d*<sub>6</sub>) δ 9.90 (s, 1H), 9.13 – 8.68 (m, 2H), 8.21 (s, 1H), 7.81 – 7.55 (m, 2H), 7.53 – 7.06 (m, 10H), 7.04 – 6.69 (m, 2H), 4.44 (s, 2H), 3.48

- 3.41 (m, 2H), 3.17 – 2.97 (m, 2H), 1.83 – 1.42 (m, 6H), 1.26 – 1.01 (m, 3H), 0.98 – 0.67 (m, 2H).  $^{13}\text{C}$  NMR (75 MHz, DMSO- $d_6$ )  $\delta$  170.86, 166.11, 164.37, 163.06, 161.19, 155.61, 152.81, 142.15, 142.00, 139.55, 137.28, 130.70, 130.56, 129.31, 128.71, 120.28, 119.70, 115.41, 115.13, 114.49, 108.71, 108.42, 105.58, 105.23, 46.95, 46.59, 43.18, 37.94, 31.07, 26.64, 25.92. MS (ESI)  $m/z$ : 616.0[M+H] $^+$ , C<sub>32</sub>H<sub>35</sub>F<sub>2</sub>N<sub>9</sub>O<sub>2</sub>. Purity: 98.0% (LC-MS).
15. 2-(2-(4-((4-((cyclohexylmethyl)amino)-6-((4-fluorobenzyl)amino)-1,3,5-triazin-2-yl)amino)phenyl)acetyl)-N-(4-fluorophenyl)hydrazine-1-carboxamide (**9f**)  
White solid, yield: 78.3%;  $^1\text{H}$  NMR (300 MHz, DMSO- $d_6$ )  $\delta$  9.87 (s, 1H), 8.96 – 8.65 (m, 2H), 8.08 (s, 1H), 7.78 – 7.55 (m, 2H), 7.44 (dd,  $J$  = 8.8, 4.9 Hz, 2H), 7.34 (t,  $J$  = 4.9 Hz, 2H), 7.25 – 7.01 (m, 6H), 6.85 (t,  $J$  = 31.3 Hz, 1H), 4.44 (s, 2H), 3.48 – 3.40 (m, 2H), 3.17 – 2.96 (m, 2H), 1.81 – 1.45 (m, 6H), 1.28 – 1.05 (m, 3H), 0.99 – 0.66 (m, 2H).  $^{13}\text{C}$  NMR (75 MHz, DMSO- $d_6$ )  $\delta$  170.89, 166.25, 166.12, 164.53, 163.07, 159.86, 159.39, 156.24, 155.89, 139.63, 137.36, 136.44, 129.40, 129.30, 128.68, 120.68, 120.58, 119.94, 119.68, 115.72, 115.42, 115.13, 46.90, 46.67, 43.20, 37.93, 31.07, 26.64, 25.92. MS (ESI)  $m/z$ : 615.9[M+H] $^+$ , C<sub>32</sub>H<sub>35</sub>F<sub>2</sub>N<sub>9</sub>O<sub>2</sub>. Purity: 96.5% (LC-MS).
16. 2-(2-(4-((4-((cyclohexylmethyl)amino)-6-((4-fluorobenzyl)amino)-1,3,5-triazin-2-yl)amino)phenyl)acetyl)-N-(*o*-tolyl)hydrazine-1-carboxamide (**9g**)  
White solid, yield: 74.5%;  $^1\text{H}$  NMR (300 MHz, DMSO- $d_6$ )  $\delta$  9.94 (s, 1H), 8.96 – 8.65 (m, 1H), 8.35 (s, 1H), 7.91 (s, 1H), 7.78 – 7.54 (m, 3H), 7.34 (s, 3H), 7.25 – 7.02 (m, 6H), 7.02 – 6.69 (m, 2H), 4.44 (s, 2H), 3.51 – 3.41 (m, 2H), 3.17 – 2.93 (m, 2H), 2.16 (s, 3H), 1.81 – 1.41 (m, 6H), 1.21 – 1.05 (m, 3H), 0.91 – 0.70 (m, 2H).  $^{13}\text{C}$  NMR (75 MHz, DMSO- $d_6$ )  $\delta$  170.71, 166.29, 164.55, 159.93, 155.95, 139.68, 137.62, 137.38, 130.62, 129.41, 129.27, 128.98, 128.68, 126.55, 123.59, 122.30, 120.06, 119.67, 115.41, 115.12, 56.51, 46.93, 46.65, 43.19, 37.92, 31.07, 26.65, 25.93, 19.02, 18.15. MS (ESI)  $m/z$ : 612.0[M+H] $^+$ , C<sub>33</sub>H<sub>38</sub>FN<sub>9</sub>O<sub>2</sub>. Purity: 96.3% (LC-MS).
17. 2-(2-(4-((4-((cyclohexylmethyl)amino)-6-((4-fluorobenzyl)amino)-1,3,5-triazin-2-yl)amino)phenyl)acetyl)-N-(*m*-tolyl)hydrazine-1-carboxamide (**9h**)  
White solid, yield: 72.6%;  $^1\text{H}$  NMR (300 MHz, DMSO- $d_6$ )  $\delta$  10.12 (s, 1H), 9.22 – 8.85 (m, 1H), 8.85 (s, 1H), 8.28 (s, 1H), 8.04 – 7.80 (m, 2H), 7.71 – 7.45 (m, 5H), 7.41 – 7.31 (m, 5H), 7.28 – 6.96 (m, 2H), 4.69 (s, 2H), 3.73 – 3.65 (m, 2H), 3.41 – 3.23 (m, 2H), 2.76 (s, 3H), 2.01 – 1.62 (m, 6H), 1.51 – 1.29 (m, 3H), 1.24 – 0.92 (m, 2H).  $^{13}\text{C}$  NMR (75 MHz, DMSO- $d_6$ )  $\delta$  170.85, 166.35, 166.13, 164.54, 155.74, 139.97, 139.66, 138.26, 137.35, 129.41, 129.29, 128.96, 128.69, 123.06, 119.68, 119.34, 116.02, 115.41, 115.12, 101.03, 46.74, 46.63, 43.36, 37.97, 31.07, 26.66, 25.93, 21.64. MS (ESI)  $m/z$ : 612.0[M+H] $^+$ , C<sub>33</sub>H<sub>38</sub>FN<sub>9</sub>O<sub>2</sub>. Purity: 97.2% (LC-MS).
18. 2-(2-(4-((4-((cyclohexylmethyl)amino)-6-((4-fluorobenzyl)amino)-1,3,5-triazin-2-yl)amino)phenyl)acetyl)-N-(*p*-tolyl)hydrazine-1-carboxamide (**9i**)  
White solid, yield: 78.6%;  $^1\text{H}$  NMR (300 MHz, DMSO- $d_6$ )  $\delta$  9.86 (s, 1H), 9.03 – 8.67 (m, 1H), 8.58 (s, 1H), 8.00 (s, 1H), 7.78 – 7.51 (m, 2H), 7.43 – 7.00 (m, 11H), 6.85 (t,  $J$  = 27.3 Hz, 1H), 4.44 (s, 2H), 3.48 – 3.40 (m, 2H), 3.19 – 2.95 (m, 2H), 2.22 (s, 3H), 1.82 – 1.38 (m, 6H), 1.27 – 1.02 (m, 3H), 0.98 – 0.66 (m, 2H).  $^{13}\text{C}$  NMR (75 MHz, DMSO- $d_6$ )  $\delta$  170.85, 166.40, 166.29, 166.17, 164.56, 163.07, 159.87, 155.82, 139.65, 137.50, 131.12, 129.50, 129.29, 128.70, 120.02, 119.68, 118.94, 115.40, 115.12, 46.89, 46.67, 43.20, 42.91, 37.95, 31.07, 26.65, 25.93, 20.78. MS (ESI)  $m/z$ : 612.0[M+H] $^+$ , C<sub>33</sub>H<sub>38</sub>FN<sub>9</sub>O<sub>2</sub>. Purity: 97.1% (LC-MS).
19. 2-(2-(4-((4-((cyclohexylmethyl)amino)-6-((4-fluorobenzyl)amino)-1,3,5-triazin-2-yl)amino)phenyl)acetyl)-N-(4-(trifluoromethyl)phenyl)hydrazine-1-carboxamide (**9j**)

White solid, yield: 79.8%; <sup>1</sup>H NMR (300 MHz, DMSO-*d*<sub>6</sub>) δ 9.93 (s, 1H), 9.16 (s, 1H), 8.97 – 8.66 (m, 1H), 8.28 (s, 1H), 7.78 – 7.53 (m, 6H), 7.42 – 7.06 (m, 7H), 6.85 (t, *J* = 30.7 Hz, 1H), 4.40 (s, 2H), 3.55 – 3.41 (m, 2H), 3.19 – 2.95 (m, 2H), 1.78 – 1.41 (m, 6H), 1.27 – 1.03 (m, 3H), 0.98 – 0.68 (m, 2H). <sup>13</sup>C NMR (75 MHz, DMSO-*d*<sub>6</sub>) δ 170.89, 166.43, 166.30, 166.17, 164.57, 163.06, 159.87, 155.51, 143.91, 139.68, 137.35, 129.41, 129.30, 128.60, 126.81, 126.37, 123.22, 122.51, 122.09, 120.05, 119.69, 118.51, 115.40, 115.11, 46.94, 46.62, 43.24, 42.98, 37.96, 31.07, 26.64, 25.93. MS (ESI) *m/z*: 665.9[M+H]<sup>+</sup>, C<sub>33</sub>H<sub>35</sub>F<sub>4</sub>N<sub>9</sub>O<sub>2</sub>. Purity: 97.2% (LC-MS).

20. 2-(2-(4-((4-((cyclohexylmethyl)amino)-6-((4-fluorobenzyl)amino)-1,3,5-triazin-2-yl)amino)phenyl)acetyl)-N-(4-(trifluoromethoxy)phenyl)hydrazine-1-carboxamide (**9k**)

White solid, yield: 82.6%; <sup>1</sup>H NMR (300 MHz, DMSO-*d*<sub>6</sub>) δ 9.90 (s, 1H), 8.99 – 8.68 (m, 2H), 8.17 (s, 1H), 7.77 – 7.47 (m, 4H), 7.39 – 7.07 (m, 9H), 6.90 (d, *J* = 32.3 Hz, 1H), 4.44 (s, 2H), 3.48 – 3.41 (m, 2H), 3.15 – 2.97 (m, 2H), 1.74 – 1.36 (m, 6H), 1.25 – 1.03 (m, 3H), 0.97 – 0.67 (m, 2H). <sup>13</sup>C NMR (75 MHz, DMSO-*d*<sub>6</sub>) δ 172.35, 166.43, 166.30, 166.18, 164.58, 163.08, 159.88, 139.98, 137.61, 137.33, 129.50, 129.42, 129.31, 127.25, 120.09, 119.97, 119.82, 115.38, 115.10, 52.02, 46.98, 46.66, 43.27, 43.15, 42.98, 38.08, 37.92, 31.07, 26.65, 25.93. MS (ESI) *m/z*: 681.9[M+H]<sup>+</sup>, C<sub>33</sub>H<sub>35</sub>F<sub>4</sub>N<sub>9</sub>O<sub>3</sub>. Purity: 97.6% (LC-MS).

21. 2-(2-(4-((4-((cyclohexylmethyl)amino)-6-((4-fluorobenzyl)amino)-1,3,5-triazin-2-yl)amino)phenyl)acetyl)-N-(4-cyanophenyl)hydrazine-1-carboxamide (**9l**)

White solid, yield: 83.3%; <sup>1</sup>H NMR (300 MHz, DMSO-*d*<sub>6</sub>) δ 9.95 (s, 1H), 9.44 (s, 1H), 8.97 – 8.66 (m, 1H), 8.40 (s, 1H), 7.67 (dd, *J* = 18.0, 8.7 Hz, 6H), 7.47 – 7.07 (m, 7H), 6.85 (t, *J* = 29.8 Hz, 1H), 4.44 (s, 2H), 3.50 – 3.41 (m, 2H), 3.18 – 2.96 (m, 2H), 1.67 (m, 6H), 1.28 – 0.99 (m, 3H), 0.99 – 0.66 (m, 2H). <sup>13</sup>C NMR (75 MHz, DMSO-*d*<sub>6</sub>) δ 170.84, 166.29, 164.54, 163.06, 159.86, 155.31, 144.72, 139.64, 137.34, 133.62, 129.41, 129.30, 128.59, 119.76, 118.62, 115.40, 115.12, 103.73, 99.99, 46.93, 42.94, 37.96, 31.06, 26.65, 25.92. MS (ESI) *m/z*: 665.9[M+H]<sup>+</sup>, C<sub>33</sub>H<sub>35</sub>FN<sub>10</sub>O<sub>2</sub>. Purity: 96.5% (LC-MS).

22. 2-(2-(4-((4-((cyclohexylmethyl)amino)-6-((4-fluorobenzyl)amino)-1,3,5-triazin-2-yl)amino)phenyl)acetyl)-N-(4-nitrophenyl)hydrazine-1-carboxamide (**9m**)

Yellow solid, yield: 75.4%; <sup>1</sup>H NMR (300 MHz, DMSO-*d*<sub>6</sub>) δ 9.98 (s, 1H), 9.59 (d, *J* = 45.7 Hz, 1H), 8.97 – 8.64 (m, 1H), 8.45 (s, 1H), 8.17 (d, *J* = 9.1 Hz, 2H), 7.81 – 7.55 (m, 4H), 7.45 – 7.08 (m, 7H), 6.84 (t, *J* = 35.3 Hz, 1H), 4.44 (s, 2H), 3.51 – 3.42 (m, 2H), 3.18 – 2.95 (m, 2H), 1.74 – 1.39 (m, 6H), 1.28 – 1.01 (m, 3H), 0.99 – 0.66 (m, 2H). <sup>13</sup>C NMR (75 MHz, DMSO-*d*<sub>6</sub>) δ 170.87, 166.30, 166.16, 164.56, 163.07, 159.86, 155.18, 146.84, 141.57, 139.69, 137.37, 129.41, 129.31, 128.54, 126.84, 125.46, 119.71, 118.15, 115.40, 115.12, 112.84, 46.97, 46.63, 43.27, 37.95, 31.07, 26.65, 25.93. MS (ESI) *m/z*: 642.9[M+H]<sup>+</sup>, C<sub>32</sub>H<sub>35</sub>FN<sub>10</sub>O<sub>4</sub>. Purity: 97.3% (LC-MS).

23. 2-(2-(4-((4-((cyclohexylmethyl)amino)-6-((4-fluorobenzyl)amino)-1,3,5-triazin-2-yl)amino)phenyl)acetyl)-N-benzylhydrazine-1-carboxamide (**9n**)

White solid, yield: 69.5%; <sup>1</sup>H NMR (300 MHz, DMSO-*d*<sub>6</sub>) δ 9.74 (s, 1H), 8.98 – 8.65 (m, 1H), 7.89 (s, 1H), 7.82 – 7.53 (m, 2H), 7.47 – 7.21 (m, 8H), 7.15 – 7.03 (m, 4H), 7.01 – 6.71 (m, 2H), 4.44 (s, 2H), 4.24 (d, *J* = 5.8 Hz, 2H), 3.36 (s, 2H), 3.17 – 2.97 (m, 2H), 1.76 – 1.35 (m, 6H), 1.28 – 1.03 (m, 3H), 0.94 – 0.74 (m, 2H). <sup>13</sup>C NMR (75 MHz, DMSO-*d*<sub>6</sub>) δ 170.88, 166.40, 166.28, 166.20, 164.56, 163.06, 159.87, 158.68, 140.96, 139.61, 137.63, 137.35, 129.41, 129.33, 128.76, 128.58, 127.53, 127.39, 126.99, 120.06, 119.95, 119.85, 119.65, 115.40, 115.12, 46.93,

46.63, 43.29, 43.11, 37.94, 31.08, 26.65, 25.93. MS (ESI)  $m/z$ : 612.0[M+H]<sup>+</sup>, C<sub>33</sub>H<sub>38</sub>FN<sub>9</sub>O<sub>2</sub>. Purity: 97.5% (LC-MS).

24. 2-(2-(4-((4-((cyclohexylmethyl)amino)-6-((4-fluorobenzyl)amino)-1,3,5-triazin-2-yl)amino)phenyl)acetyl)-N-(2-chlorophenyl)hydrazine-1-carbothioamide (**10a**)

White solid, yield: 78.6%; <sup>1</sup>H NMR (300 MHz, DMSO-*d*<sub>6</sub>) δ 10.33 – 9.99 (m, 1H), 9.95 – 9.66 (m, 1H), 9.45 (s, 1H), 8.99 – 8.65 (m, 1H), 7.79 – 7.56 (m, 2H), 7.49 (d, *J* = 7.8 Hz, 2H), 7.38 – 7.02 (m, 9H), 6.84 (t, *J* = 37.2 Hz, 1H), 4.44 (d, *J* = 5.0 Hz, 2H), 3.43 (t, *J* = 37.5 Hz, 2H), 3.16 – 2.95 (m, 2H), 1.79 – 1.29 (m, 6H), 1.26 – 1.01 (m, 3H), 0.98 – 0.67 (m, 2H). <sup>13</sup>C NMR (75 MHz, DMSO-*d*<sub>6</sub>) δ 182.18, 170.90, 166.42, 166.35, 166.19, 164.55, 163.04, 159.88, 139.70, 137.33, 131.00, 129.76, 129.56, 129.42, 128.30, 127.53, 119.91, 119.62, 115.41, 115.13, 46.92, 46.64, 43.31, 43.00, 37.94, 31.07, 26.65, 25.93. MS (ESI)  $m/z$ : 647.9[M+H]<sup>+</sup>, C<sub>32</sub>H<sub>35</sub>ClFN<sub>9</sub>OS. Purity: 96.4% (LC-MS).

25. 2-(2-(4-((4-((cyclohexylmethyl)amino)-6-((4-fluorobenzyl)amino)-1,3,5-triazin-2-yl)amino)phenyl)acetyl)-N-(3-chlorophenyl)hydrazine-1-carbothioamide (**10b**)

White solid, yield: 75.4%; <sup>1</sup>H NMR (300 MHz, DMSO-*d*<sub>6</sub>) δ 10.14 (s, 1H), 9.92 – 9.54 (m, 2H), 8.99 – 8.63 (m, 1H), 7.65 (s, 3H), 7.47 – 7.03 (m, 10H), 6.84 (t, *J* = 32.1 Hz, 1H), 4.44 (s, 2H), 3.45 (s, 2H), 3.15 – 2.97 (m, 2H), 1.80 – 1.31 (m, 6H), 1.24 – 1.03 (m, 3H), 0.99 – 0.67 (m, 2H). <sup>13</sup>C NMR (75 MHz, DMSO-*d*<sub>6</sub>) δ 181.43, 170.69, 166.41, 166.28, 166.16, 164.54, 163.07, 159.86, 141.18, 139.68, 137.44, 132.66, 130.17, 129.53, 129.41, 129.31, 128.35, 125.19, 119.93, 119.65, 115.40, 115.13, 46.94, 46.74, 43.21, 42.93, 37.97, 31.07, 26.66, 25.93. MS (ESI)  $m/z$ : 647.9[M+H]<sup>+</sup>, C<sub>32</sub>H<sub>35</sub>ClFN<sub>9</sub>OS. Purity: 95.4% (LC-MS).

26. 2-(2-(4-((4-((cyclohexylmethyl)amino)-6-((4-fluorobenzyl)amino)-1,3,5-triazin-2-yl)amino)phenyl)acetyl)-N-(4-chlorophenyl)hydrazine-1-carbothioamide (**10c**)

White solid, yield: 70.3%; <sup>1</sup>H NMR (300 MHz, DMSO-*d*<sub>6</sub>) δ 10.27 – 9.91 (m, 1H), 9.71 (s, 2H), 8.99 – 8.66 (m, 1H), 7.79 – 7.56 (m, 2H), 7.54 – 7.42 (m, 2H), 7.43 – 7.01 (m, 9H), 6.85 (t, *J* = 34.2 Hz, 1H), 4.44 (d, *J* = 5.6 Hz, 2H), 3.44 (s, 2H), 3.16 – 2.97 (m, 2H), 1.86 – 1.32 (m, 6H), 1.25 – 1.03 (m, 3H), 0.97 – 0.66 (m, 2H). <sup>13</sup>C NMR (75 MHz, DMSO-*d*<sub>6</sub>) δ 181.53, 170.71, 166.46, 166.28, 166.11, 164.52, 163.05, 159.84, 139.70, 138.62, 137.40, 129.53, 129.41, 129.33, 128.47, 127.68, 119.97, 119.65, 115.40, 115.12, 46.94, 46.65, 43.31, 43.08, 38.00, 31.07, 26.65, 25.93. MS (ESI)  $m/z$ : 647.9[M+H]<sup>+</sup>, C<sub>32</sub>H<sub>35</sub>ClFN<sub>9</sub>OS. Purity: 96.5% (LC-MS).

27. 2-(2-(4-((4-((cyclohexylmethyl)amino)-6-((4-fluorobenzyl)amino)-1,3,5-triazin-2-yl)amino)phenyl)acetyl)-N-(2-fluorophenyl)hydrazine-1-carbothioamide (**10d**)

White solid, yield: 78.9%; <sup>1</sup>H NMR (300 MHz, DMSO-*d*<sub>6</sub>) δ 10.17 (s, 1H), 9.77 (s, 1H), 9.48 (s, 1H), 8.93 – 8.64 (m, 1H), 7.76 – 7.54 (m, 2H), 7.53 – 6.99 (m, 11H), 6.85 (t, *J* = 32.4 Hz, 1H), 4.44 (d, *J* = 4.8 Hz, 2H), 3.42 (t, *J* = 22.8 Hz, 2H), 3.16 – 2.98 (m, 2H), 1.79 – 1.31 (m, 6H), 1.26 – 1.00 (m, 3H), 0.97 – 0.67 (m, 2H). <sup>13</sup>C NMR (75 MHz, DMSO-*d*<sub>6</sub>) δ 182.65, 170.67, 166.33, 164.53, 163.06, 159.86, 139.66, 137.38, 129.54, 129.42, 128.37, 127.61, 124.40, 119.85, 119.60, 116.29, 116.02, 115.40, 115.13, 46.92, 46.63, 43.24, 43.01, 37.95, 31.06, 26.64, 25.93. MS (ESI)  $m/z$ : 631.9[M+H]<sup>+</sup>, C<sub>32</sub>H<sub>35</sub>F<sub>2</sub>N<sub>9</sub>OS. Purity: 97.2% (LC-MS).

28. 2-(2-(4-((4-((cyclohexylmethyl)amino)-6-((4-fluorobenzyl)amino)-1,3,5-triazin-2-yl)amino)phenyl)acetyl)-N-(3-fluorophenyl)hydrazine-1-carbothioamide (**10e**)

White solid, yield: 72.2%; <sup>1</sup>H NMR (300 MHz, DMSO-*d*<sub>6</sub>) δ 10.14 (s, 1H), 9.90 – 9.54 (m, 2H), 8.96 – 8.66 (m, 1H), 7.78 – 7.57 (m, 2H), 7.51 (d, *J* = 9.0 Hz, 1H), 7.45 – 7.06 (m, 9H), 6.98 (t, *J* = 8.5 Hz, 1H), 6.79 (t, *J* = 31.2 Hz, 1H), 4.43 (s, 2H), 3.44 (s, 2H), 3.15 – 2.95 (m, 2H), 1.80

- 1.36 (m, 6H), 1.80 – 1.37 (m, 3H), 0.98 – 0.67 (m, 2H).  $^{13}\text{C}$  NMR (75 MHz, DMSO- $d_6$ )  $\delta$  181.40, 170.70, 166.30, 164.54, 163.62, 163.07, 160.42, 159.87, 141.51, 141.36, 139.73, 137.39, 130.10, 129.54, 129.42, 128.38, 120.04, 119.65, 115.41, 115.13, 111.89, 46.96, 46.62, 43.21, 42.98, 37.98, 31.08, 26.64, 25.93. MS (ESI)  $m/z$ : 631.9[M+H] $^+$ ,  $\text{C}_{32}\text{H}_{35}\text{F}_2\text{N}_9\text{OS}$ . Purity: 97.0% (LC-MS).
29. 2-(2-(4-((4-((cyclohexylmethyl)amino)-6-((4-fluorobenzyl)amino)-1,3,5-triazin-2-yl)amino)phenyl)acetyl)-N-(4-fluorophenyl)hydrazine-1-carbothioamide (**10f**)  
White solid, yield: 65.7%;  $^1\text{H}$  NMR (300 MHz, DMSO- $d_6$ )  $\delta$  10.21 (s, 1H), 9.64 (s, 2H), 8.98 – 8.63 (m, 1H), 7.82 – 7.54 (m, 2H), 7.49 – 7.02 (m, 11H), 6.84 (t,  $J$  = 31.3 Hz, 1H), 4.44 (s, 2H), 3.55 – 3.39 (m, 2H), 3.19 – 2.96 (m, 2H), 1.83 – 1.36 (m, 6H), 1.25 – 0.99 (m, 3H), 0.98 – 0.66 (m, 2H).  $^{13}\text{C}$  NMR (75 MHz, DMSO- $d_6$ )  $\delta$  181.83, 170.73, 166.42, 166.30, 166.17, 164.55, 163.08, 161.53, 159.87, 158.31, 139.69, 137.39, 135.93, 129.54, 129.42, 129.31, 128.41, 120.01, 119.62, 115.38, 115.08, 46.93, 46.63, 43.24, 42.93, 37.95, 31.07, 26.66, 25.93. MS (ESI)  $m/z$ : 631.9[M+H] $^+$ ,  $\text{C}_{32}\text{H}_{35}\text{F}_2\text{N}_9\text{OS}$ . Purity: 97.5% (LC-MS).
30. 2-(2-(4-((4-((cyclohexylmethyl)amino)-6-((4-fluorobenzyl)amino)-1,3,5-triazin-2-yl)amino)phenyl)acetyl)-N-(*o*-tolyl)hydrazine-1-carbothioamide (**10g**)  
White solid, yield: 73.6%;  $^1\text{H}$  NMR (300 MHz, DMSO- $d_6$ )  $\delta$  10.09 (s, 1H), 9.51 (s, 1H), 9.40 (s, 1H), 8.98 – 8.65 (m, 1H), 7.81 – 7.56 (m, 2H), 7.34 (s, 3H), 7.22 – 7.09 (m, 8H), 6.85 (t,  $J$  = 29.7 Hz, 1H), 4.44 (s, 2H), 3.43 (s, 2H), 3.19 – 2.97 (s, 2H), 2.16 (s, 3H), 1.73 – 1.43 (m, 6H), 1.21 – 1.06 (m, 3H), 0.96 – 0.72 (m, 2H).  $^{13}\text{C}$  NMR (75 MHz, DMSO- $d_6$ )  $\delta$  182.14, 170.66, 166.41, 166.31, 166.14, 164.55, 163.07, 159.87, 139.67, 138.35, 137.37, 136.14, 135.27, 131.25, 130.54, 129.99, 129.57, 129.42, 129.32, 128.46, 127.71, 127.12, 126.34, 126.29, 119.96, 119.59, 115.40, 115.12, 46.96, 46.64, 43.26, 43.11, 42.95, 39.18, 37.97, 31.08, 26.66, 25.94, 25.60, 18.28, 18.10. MS (ESI)  $m/z$ : 628.0[M+H] $^+$ ,  $\text{C}_{33}\text{H}_{38}\text{FN}_9\text{OS}$ . Purity: 97.3% (LC-MS).
31. 2-(2-(4-((4-((cyclohexylmethyl)amino)-6-((4-fluorobenzyl)amino)-1,3,5-triazin-2-yl)amino)phenyl)acetyl)-N-(*m*-tolyl)hydrazine-1-carbothioamide (**10h**)  
White solid, yield: 68.2%;  $^1\text{H}$  NMR (300 MHz, DMSO- $d_6$ )  $\delta$  10.21 (s, 1H), 9.58 (s, 2H), 8.99 – 8.66 (m, 1H), 7.80 – 7.55 (m, 2H), 7.43 – 7.04 (m, 10H), 7.02 – 6.66 (m, 2H), 4.44 (s, 2H), 3.53 – 3.40 (m, 2H), 3.18 – 2.97 (m, 2H), 2.29 (s, 3H), 1.81 – 1.35 (m, 6H), 1.29 – 1.01 (m, 3H), 0.99 – 0.66 (m, 2H).  $^{13}\text{C}$  NMR (75 MHz, DMSO- $d_6$ )  $\delta$  181.44, 170.69, 166.27, 164.54, 163.08, 159.87, 139.71, 139.46, 137.83, 137.36, 129.53, 129.42, 129.32, 128.46, 126.11, 119.95, 119.66, 115.40, 115.12, 46.67, 43.26, 37.96, 31.08, 26.66, 25.94, 21.40. MS (ESI)  $m/z$ : 627.9[M+H] $^+$ ,  $\text{C}_{33}\text{H}_{38}\text{FN}_9\text{OS}$ . Purity: 98.1% (LC-MS).
32. 2-(2-(4-((4-((cyclohexylmethyl)amino)-6-((4-fluorobenzyl)amino)-1,3,5-triazin-2-yl)amino)phenyl)acetyl)-N-(*p*-tolyl)hydrazine-1-carbothioamide (**10i**)  
White solid, yield: 66.5%;  $^1\text{H}$  NMR (300 MHz, DMSO- $d_6$ )  $\delta$  10.16 (s, 1H), 9.53 (s, 2H), 8.97 – 8.63 (m, 1H), 7.80 – 7.53 (m, 2H), 7.50 – 7.01 (m, 11H), 6.84 (t,  $J$  = 35.8 Hz, 1H), 4.44 (d,  $J$  = 4.7 Hz, 2H), 3.52 – 3.38 (m, 2H), 3.15 – 2.96 (m, 2H), 2.28 (s, 3H), 1.80 – 1.32 (m, 6H), 1.27 – 1.02 (m, 3H), 0.94 – 0.68 (m, 2H).  $^{13}\text{C}$  NMR (75 MHz, DMSO- $d_6$ )  $\delta$  181.61, 170.63, 166.29, 164.55, 163.07, 159.87, 139.68, 137.34, 137.01, 134.65, 129.53, 129.41, 129.31, 129.04, 128.46, 126.00, 119.90, 119.64, 115.39, 115.12, 46.88, 46.64, 43.24, 43.01, 37.94, 31.06, 26.65, 25.93, 21.01. MS (ESI)  $m/z$ : 627.9[M+H] $^+$ ,  $\text{C}_{33}\text{H}_{38}\text{FN}_9\text{OS}$ . Purity: 98.0% (LC-MS).
33. 2-(2-(4-((4-((cyclohexylmethyl)amino)-6-((4-fluorobenzyl)amino)-1,3,5-triazin-2-yl)amino)phenyl)acetyl)-N-(4-(trifluoromethyl)phenyl)hydrazine-1-carbothioamide (**10j**)

White solid, yield: 67.4%; <sup>1</sup>H NMR (300 MHz, DMSO-*d*<sub>6</sub>) δ 10.17 (s, 1H), 9.86 (s, 2H), 8.95 – 8.67 (m, 1H), 7.90 – 7.51 (m, 6H), 7.49 – 7.03 (m, 7H), 6.85 (t, *J* = 31.3 Hz, 1H), 4.43 (s, 2H), 3.45 (s, 2H), 3.16 – 2.96 (m, 2H), 1.80 – 1.30 (m, 6H), 1.28 – 1.00 (m, 3H), 0.98 – 0.65 (m, 2H). <sup>13</sup>C NMR (75 MHz, DMSO-*d*<sub>6</sub>) δ 181.43, 166.24, 164.53, 163.07, 159.80, 143.47, 139.72, 137.34, 129.52, 129.40, 129.31, 128.37, 126.60, 125.97, 125.69, 125.53, 123.00, 120.00, 119.62, 115.40, 115.13, 46.92, 46.66, 43.27, 43.04, 37.95, 31.06, 30.98, 26.64, 25.92. MS (ESI) *m/z*: 681.9[M+H]<sup>+</sup>, C<sub>33</sub>H<sub>35</sub>F<sub>4</sub>N<sub>9</sub>OS. Purity: 97.6% (LC-MS).

34. 2-(2-(4-((4-((cyclohexylmethyl)amino)-6-((4-fluorobenzyl)amino)-1,3,5-triazin-2-yl)amino)phenyl)acetyl)-N-(4-(trifluoromethoxy)phenyl)hydrazine-1-carbothioamide (**10k**)

White solid, yield: 74.3%; <sup>1</sup>H NMR (300 MHz, DMSO-*d*<sub>6</sub>) δ 10.13 (s, 1H), 9.74 (s, 2H), 8.96 – 8.62 (m, 1H), 7.82 – 7.48 (m, 4H), 7.47 – 7.02 (m, 9H), 6.84 (t, *J* = 31.7 Hz, 1H), 4.43 (s, 2H), 3.43 (t, *J* = 14.4 Hz, 2H), 3.17 – 2.95 (m, 2H), 1.80 – 1.32 (m, 6H), 1.28 – 1.01 (m, 3H), 0.99 – 0.66 (m, 2H). <sup>13</sup>C NMR (75 MHz, DMSO-*d*<sub>6</sub>) δ 181.58, 166.57, 166.39, 166.16, 164.54, 163.06, 159.86, 139.68, 138.84, 137.45, 129.52, 129.41, 129.31, 128.35, 121.24, 120.00, 119.62, 118.89, 115.40, 115.12, 46.88, 46.64, 43.08, 37.89, 31.07, 26.65, 25.92. MS (ESI) *m/z*: 697.9[M+H]<sup>+</sup>, C<sub>33</sub>H<sub>35</sub>F<sub>4</sub>N<sub>9</sub>O<sub>2</sub>S. Purity: 95.4% (LC-MS).

35. 2-(2-(4-((4-((cyclohexylmethyl)amino)-6-((4-fluorobenzyl)amino)-1,3,5-triazin-2-yl)amino)phenyl)acetyl)-N-(4-cyanophenyl)hydrazine-1-carbothioamide (**10l**)

White solid, yield: 80.3%; <sup>1</sup>H NMR (300 MHz, DMSO-*d*<sub>6</sub>) δ 10.54 – 9.70 (m, 3H), 8.99 – 8.66 (m, 1H), 7.90 – 7.55 (m, 6H), 7.53 – 7.02 (m, 7H), 6.85 (t, *J* = 30.8 Hz, 1H), 4.44 (s, 2H), 3.46 (s, 2H), 3.18 – 2.96 (m, 2H), 1.77 – 1.33 (m, 6H), 1.27 – 1.00 (m, 3H), 0.99 – 0.66 (m, 2H). <sup>13</sup>C NMR (75 MHz, DMSO-*d*<sub>6</sub>) δ 181.13, 166.27, 166.12, 164.51, 163.07, 159.86, 144.21, 139.73, 137.37, 132.82, 129.51, 129.42, 129.31, 128.34, 125.72, 125.28, 120.17, 120.00, 119.66, 119.43, 115.41, 115.12, 46.91, 46.63, 43.27, 42.97, 37.97, 31.07, 26.65, 25.93. MS (ESI) *m/z*: 639.0[M+H]<sup>+</sup>, C<sub>33</sub>H<sub>35</sub>FN<sub>10</sub>OS. Purity: 96.8% (LC-MS).

36. 2-(2-(4-((4-((cyclohexylmethyl)amino)-6-((4-fluorobenzyl)amino)-1,3,5-triazin-2-yl)amino)phenyl)acetyl)-N-(4-nitrophenyl)hydrazine-1-carbothioamide (**10m**)

Yellow solid (203 mg), yield: 77.2%; <sup>1</sup>H NMR (300 MHz, DMSO-*d*<sub>6</sub>) δ 10.59 – 9.61 (m, 3H), 9.03 – 8.60 (m, 1H), 8.21 (d, *J* = 8.6 Hz, 2H), 7.90 (d, *J* = 8.8 Hz, 2H), 7.66 (s, 2H), 7.48 – 7.03 (m, 7H), 6.85 (t, *J* = 33.4 Hz, 1H), 4.44 (s, 2H), 3.47 (s, 2H), 3.09 (s, 2H), 1.81 – 1.31 (m, 6H), 1.27 – 1.06 (m, 3H), 0.99 – 0.66 (m, 2H). <sup>13</sup>C NMR (75 MHz, DMSO-*d*<sub>6</sub>) δ 181.09, 170.78, 166.21, 166.04, 164.49, 163.07, 159.86, 146.25, 143.59, 139.71, 137.33, 129.51, 129.42, 129.32, 128.34, 125.03, 124.70, 124.40, 124.28, 120.03, 119.93, 119.67, 115.41, 115.13, 46.94, 46.65, 43.23, 42.98, 37.94, 31.07, 26.64, 25.93. MS (ESI) *m/z*: 658.9[M+H]<sup>+</sup>, C<sub>32</sub>H<sub>35</sub>FN<sub>10</sub>O<sub>3</sub>S. Purity: 97.5% (LC-MS).

37. 2-(2-(4-((4-((cyclohexylmethyl)amino)-6-((4-fluorobenzyl)amino)-1,3,5-triazin-2-yl)amino)phenyl)acetyl)-N-phenylhydrazine-1-carbothioamide (**10n**)

White solid, yield: 65.8%; <sup>1</sup>H NMR (300 MHz, DMSO-*d*<sub>6</sub>) δ 10.11 (s, 1H), 9.61 (s, 2H), 8.98 – 8.63 (m, 1H), 7.80 – 7.56 (m, 2H), 7.44 (d, *J* = 7.5 Hz, 2H), 7.33 (t, *J* = 7.6 Hz, 4H), 7.15 (dd, *J* = 15.6, 7.2 Hz, 6H), 6.84 (t, *J* = 34.0 Hz, 1H), 4.44 (s, 2H), 3.52 – 3.40 (m, 2H), 3.16 – 2.95 (m, 2H), 1.74 – 1.41 (m, 6H), 1.23 – 1.02 (m, 3H), 0.96 – 0.73 (m, 2H). <sup>13</sup>C NMR (75 MHz, DMSO-*d*<sub>6</sub>) δ 181.52, 170.70, 170.64, 166.44, 166.29, 166.16, 164.55, 163.07, 159.87, 139.70, 139.61, 137.38, 129.53, 129.42, 129.31, 128.57, 128.44, 125.93, 125.58, 125.44, 119.96, 119.63, 115.40, 115.12, 46.65, 43.24, 37.96, 31.08, 26.66, 25.93. MS (ESI) *m/z*: 614.0[M+H]<sup>+</sup>,

C<sub>32</sub>H<sub>36</sub>FN<sub>9</sub>OS. Purity: 97.0% (LC-MS).

38. 2-(2-(4-((4-((cyclohexylmethyl)amino)-6-((4-fluorobenzyl)amino)-1,3,5-triazin-2-yl)amino)phenyl)acetyl)-N-benzylhydrazine-1-carbothioamide (**10o**)  
White solid, yield: 60.3%; <sup>1</sup>H NMR (300 MHz, DMSO-*d*<sub>6</sub>) δ 10.08 (s, 1H), 9.42 (s, 1H), 8.97 – 8.64 (m, 1H), 8.50 (s, 1H), 7.86 – 7.52 (m, 2H), 7.49 – 7.05 (m, 11H), 7.03 – 6.64 (m, 1H), 4.74 (d, *J* = 5.7 Hz, 2H), 4.45 (d, *J* = 5.0 Hz, 2H), 3.41 (s, 2H), 3.17 – 2.98 (m, 2H), 1.87 – 1.29 (m, 6H), 1.25 – 1.05 (m, 3H), 0.99 – 0.66 (m, 2H). <sup>13</sup>C NMR (75 MHz, DMSO-*d*<sub>6</sub>) δ 182.69, 170.73, 166.42, 166.29, 166.13, 164.55, 163.08, 159.87, 139.76, 139.68, 137.38, 129.50, 129.31, 128.52, 128.40, 127.48, 127.07, 119.99, 119.86, 119.58, 115.40, 115.13, 47.17, 46.91, 46.62, 43.22, 42.93, 37.97, 31.07, 30.95, 26.66, 25.93. MS (ESI) *m/z*: 627.9[M+H]<sup>+</sup>, C<sub>33</sub>H<sub>38</sub>FN<sub>9</sub>OS. Purity: 96.9% (LC-MS).
39. N<sup>2</sup>-(cyclohexylmethyl)-N<sup>4</sup>-(4-fluorobenzyl)-N<sup>6</sup>-(4-((4-chlorophenyl)amino)-1,3,4-oxadiazol-2-yl)methylphenyl)-1,3,5-triazine-2,4,6-triamine (**11c**)  
White solid, yield: 55.2%; <sup>1</sup>H NMR (300 MHz, DMSO-*d*<sub>6</sub>) δ 10.55 (s, 1H), 9.06 – 8.72 (m, 1H), 7.81 – 7.62 (m, 2H), 7.55 (d, *J* = 8.9 Hz, 2H), 7.47 – 7.23 (m, 5H), 7.21 – 7.04 (t, *J* = 8.7 Hz, 4H), 6.85 (t, *J* = 34.5 Hz, 1H), 4.43 (s, 2H), 4.08 (s, 2H), 3.16 – 2.95 (m, 2H), 1.72 – 1.45 (m, 6H), 1.19 – 1.00 (m, 3H), 0.97 – 0.73 (m, 2H). <sup>13</sup>C NMR (75 MHz, DMSO-*d*<sub>6</sub>) δ 166.39, 166.28, 166.13, 164.55, 164.51, 163.07, 162.77, 160.14, 159.86, 159.73, 140.25, 140.22, 140.20, 138.23, 137.36, 137.31, 129.34, 129.01, 127.57, 125.69, 120.34, 120.11, 118.84, 115.39, 115.11, 100.03, 46.97, 46.63, 43.27, 37.90, 31.05, 30.57, 26.63, 25.91. MS (ESI) *m/z*: 614.0[M+H]<sup>+</sup>, C<sub>32</sub>H<sub>33</sub>ClFN<sub>9</sub>O. Purity: 96.7% (LC-MS).
40. N<sup>2</sup>-(cyclohexylmethyl)-N<sup>4</sup>-(4-fluorobenzyl)-N<sup>6</sup>-(4-((5-(*p*-tolylamino)-1,3,4-oxadiazol-2-yl)methylphenyl)-1,3,5-triazine-2,4,6-triamine (**11i**)  
White solid, yield: 48.6%; <sup>1</sup>H NMR (300 MHz, DMSO-*d*<sub>6</sub>) δ 10.23 (s, 1H), 9.03 – 8.71 (m, 1H), 7.83 – 7.61 (m, 2H), 7.49 – 7.05 (m, 11H), 6.86 (t, *J* = 34.7 Hz, 1H), 4.43 (s, 2H), 4.06 (s, 2H), 3.15 – 2.97 (m, 2H), 2.23 (s, 3H), 1.77 – 1.46 (m, 6H), 1.19 – 1.01 (m, 3H), 0.97 – 0.68 (m, 2H). <sup>13</sup>C NMR (75 MHz, DMSO-*d*<sub>6</sub>) δ 170.85, 166.40, 166.29, 166.17, 164.56, 163.07, 159.87, 155.82, 139.65, 137.50, 131.12, 129.50, 129.29, 128.70, 120.02, 119.68, 118.94, 115.40, 115.12, 46.89, 46.67, 43.20, 42.91, 37.95, 31.07, 26.65, 25.93, 20.78. MS (ESI) *m/z*: 594.0[M+H]<sup>+</sup>, C<sub>33</sub>H<sub>36</sub>FN<sub>9</sub>O. Purity: 96.4% (LC-MS).
41. N<sup>2</sup>-(cyclohexylmethyl)-N<sup>4</sup>-(4-fluorobenzyl)-N<sup>6</sup>-(4-((5-((4-(trifluoromethyl)phenyl)amino)-1,3,4-oxadiazol-2-yl)methylphenyl)-1,3,5-triazine-2,4,6-triamine (**11j**)  
White solid, yield: 47.1%; <sup>1</sup>H NMR (300 MHz, DMSO-*d*<sub>6</sub>) δ 10.87 (s, 1H), 9.09 – 8.70 (m, 1H), 7.70 (s, 6H), 7.51 – 7.05 (m, 7H), 6.85 (t, *J* = 35.9 Hz, 1H), 4.43 (s, 2H), 4.11 (s, 2H), 3.12 – 2.97 (m, 2H), 1.81 – 1.38 (m, 6H), 1.25 – 1.08 (m, 3H), 0.96 – 0.69 (m, 2H). <sup>13</sup>C NMR (75 MHz, DMSO-*d*<sub>6</sub>) δ 166.35, 166.26, 166.18, 164.54, 163.06, 160.08, 159.92, 142.73, 140.27, 137.33, 129.41, 129.31, 129.03, 127.49, 126.87, 126.82, 122.34, 121.91, 120.31, 120.13, 117.21, 115.39, 115.11, 46.92, 46.66, 43.27, 42.91, 37.90, 31.05, 30.57, 26.62, 25.90. MS (ESI) *m/z*: 647.9[M+H]<sup>+</sup>, C<sub>33</sub>H<sub>33</sub>F<sub>4</sub>N<sub>9</sub>O. Purity: 96.2% (LC-MS).



# <sup>1</sup>H NMR, <sup>13</sup>C NMR, HPLC purity and ESI-MS of All Compounds

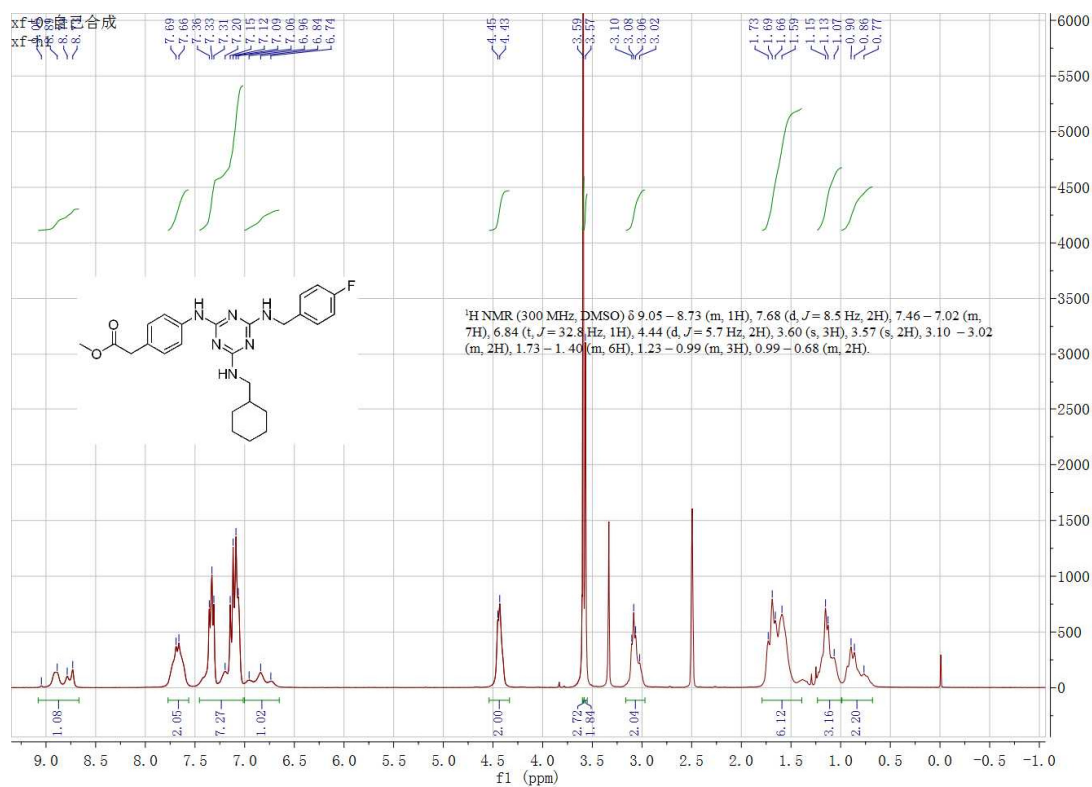

<sup>1</sup>H-NMR of 4

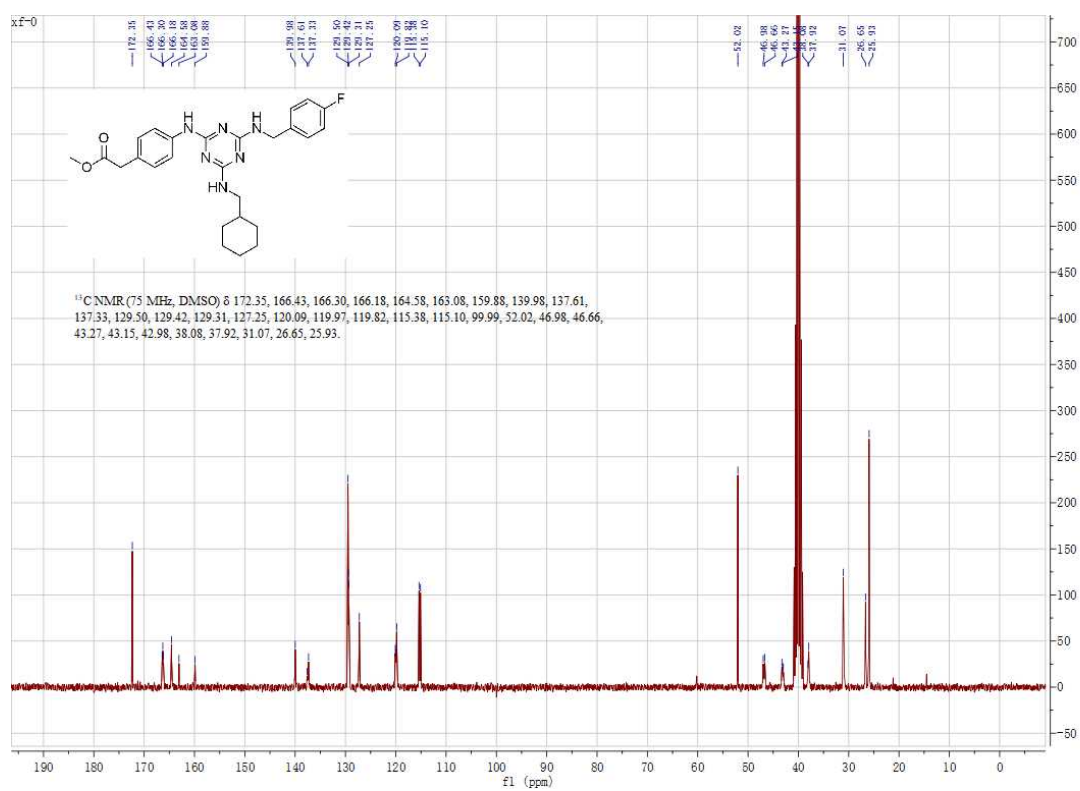

<sup>13</sup>C-NMR of 4

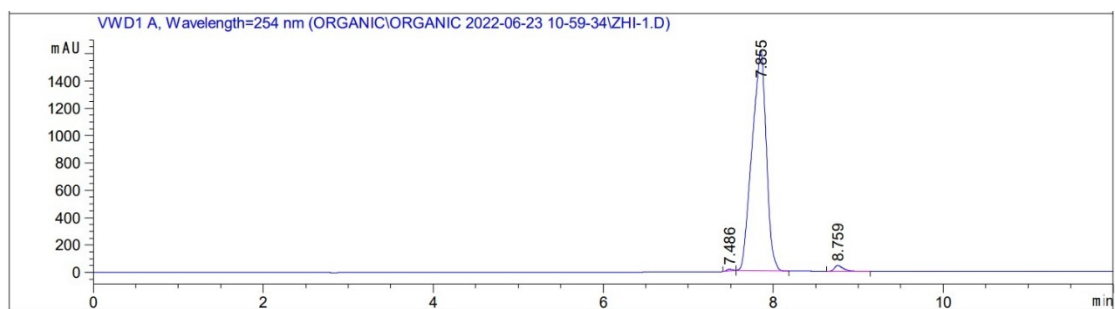

HPLC purity of 4

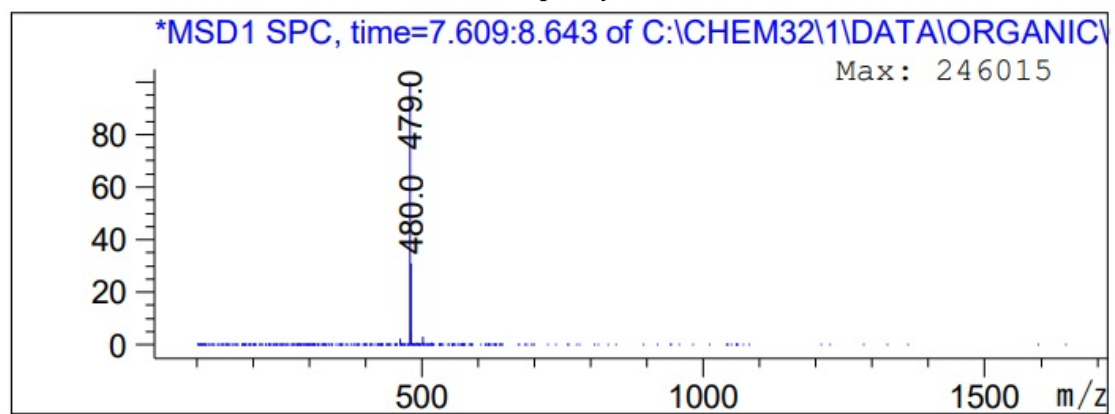

ESI-MS of 4

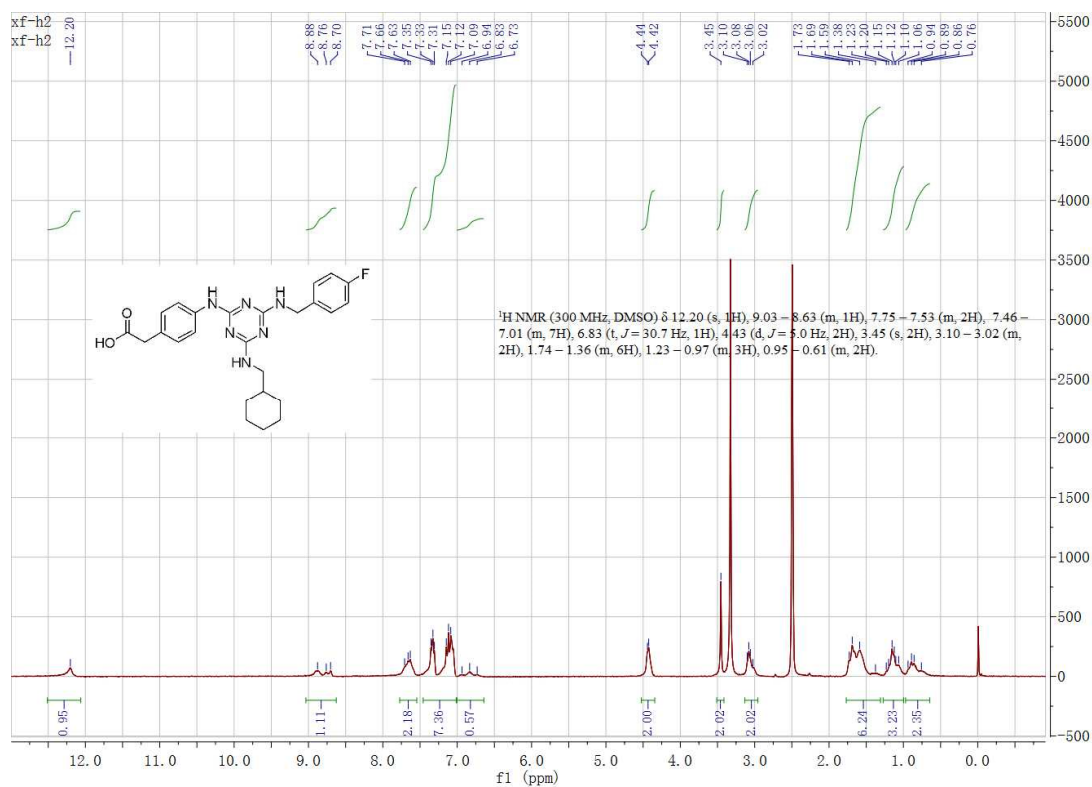

$^1\text{H}$ -NMR of 5

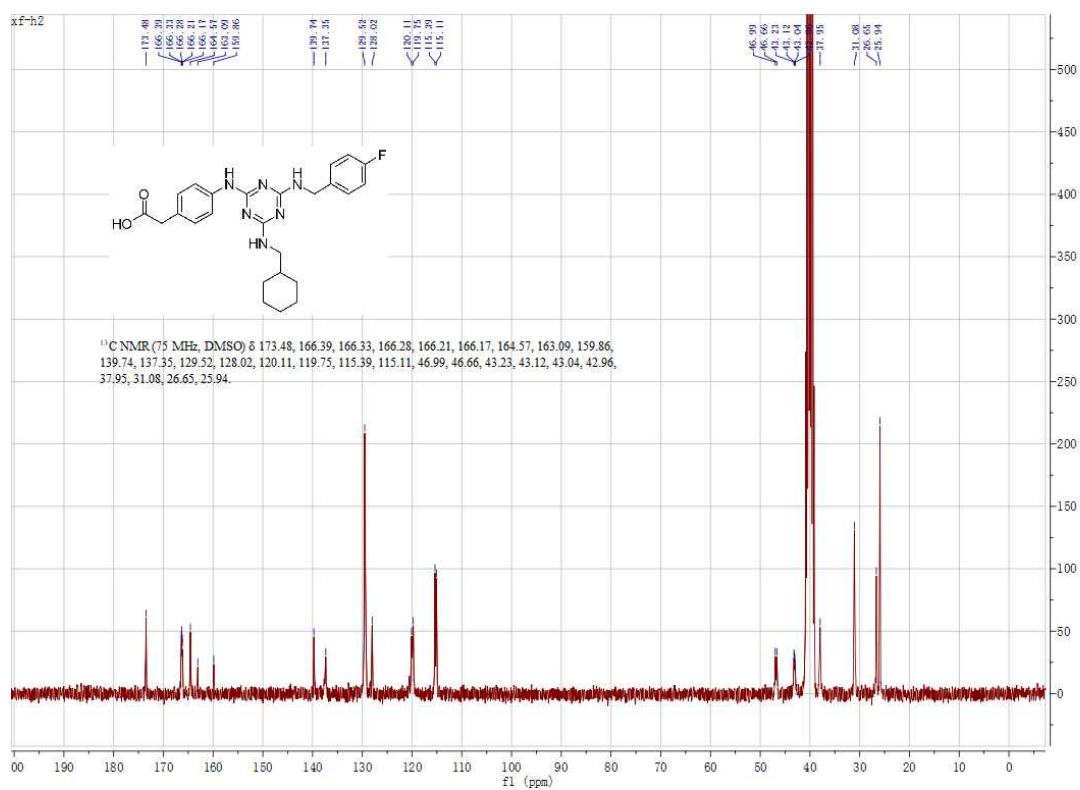

$^{13}\text{C}$ -NMR of 5

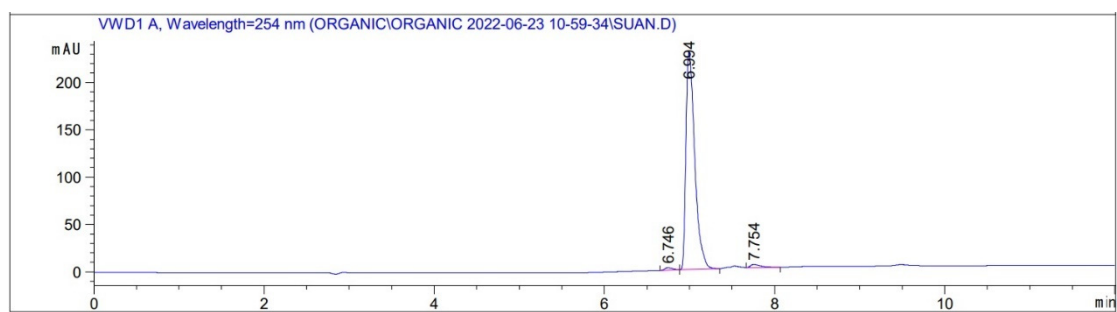

HPLC purity of 5

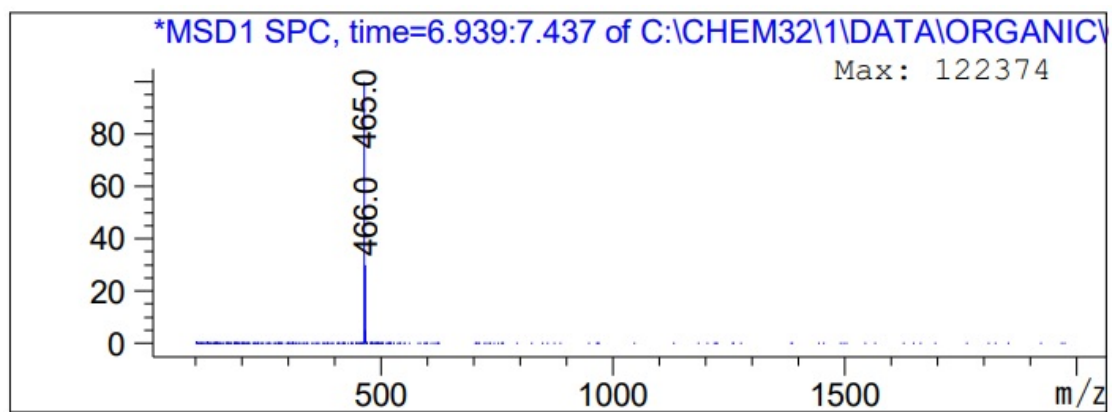

ESI-MS of 5

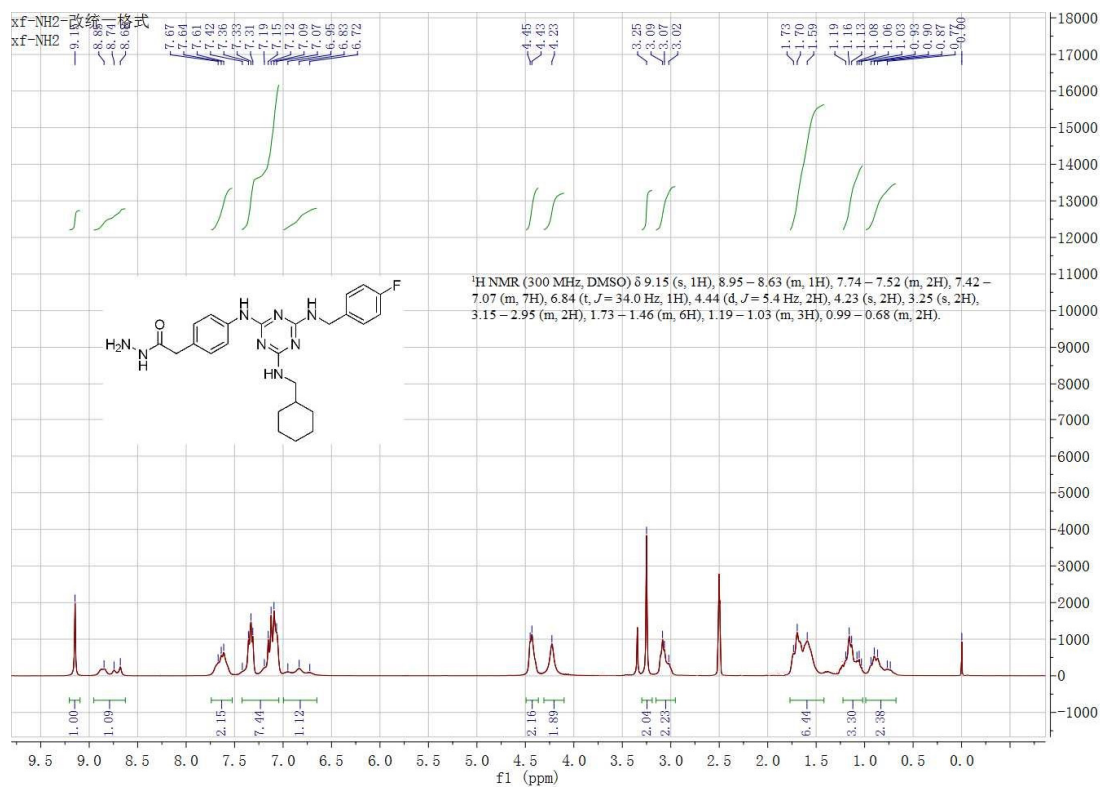

**<sup>1</sup>H-NMR of 6**

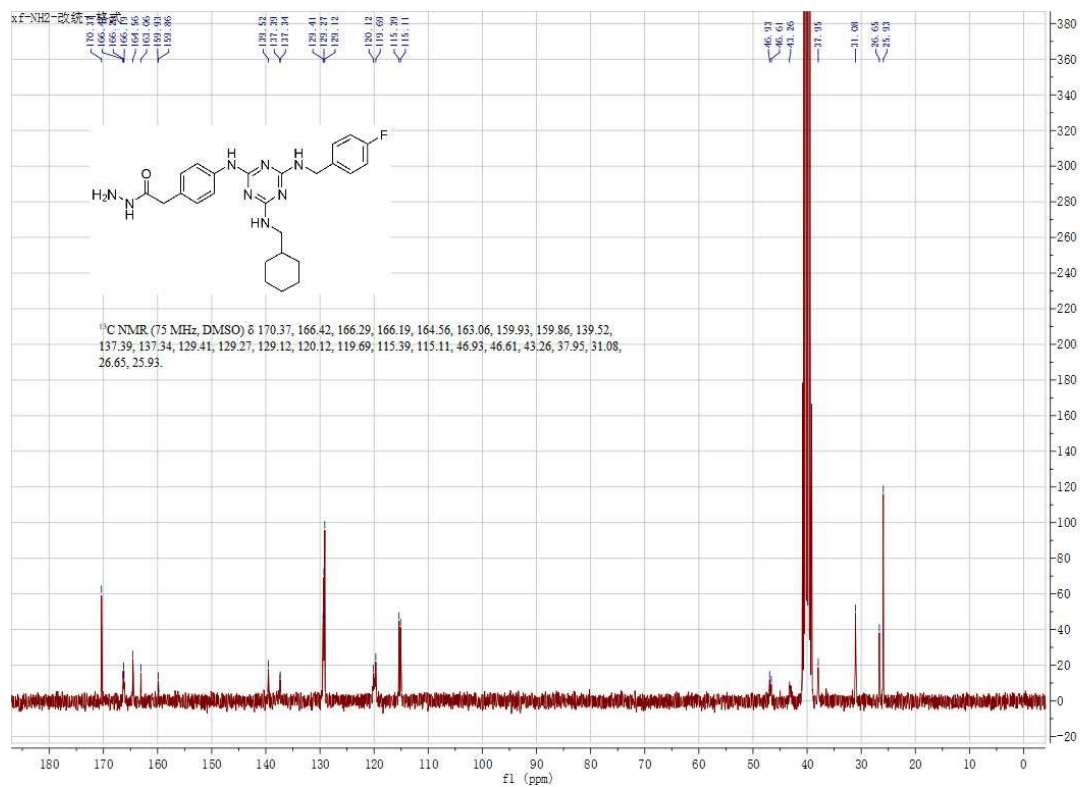

**<sup>13</sup>C-NMR of 6**

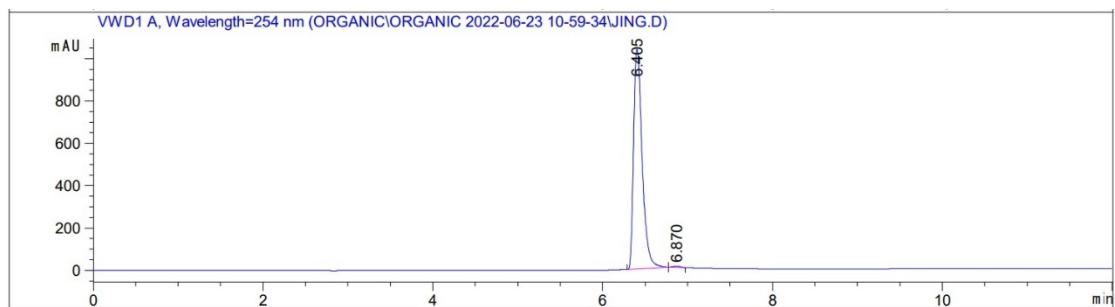

HPLC purity of 6

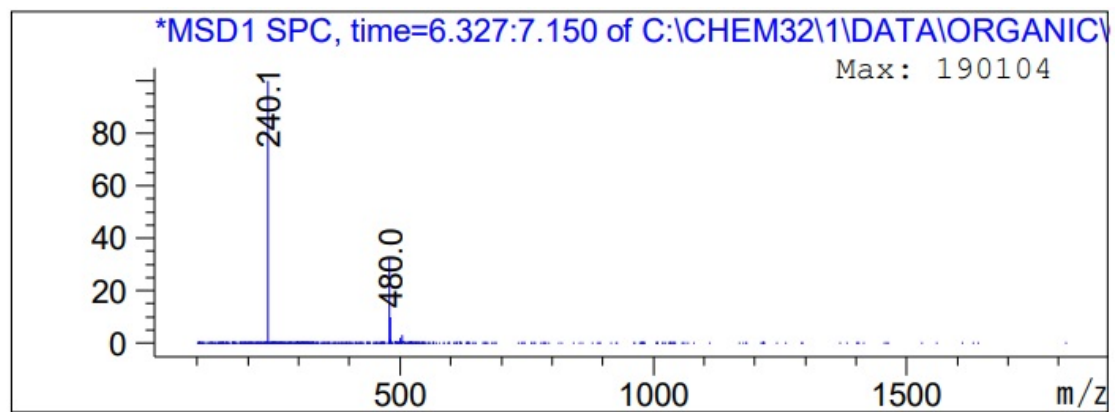

ESI-MS of 6

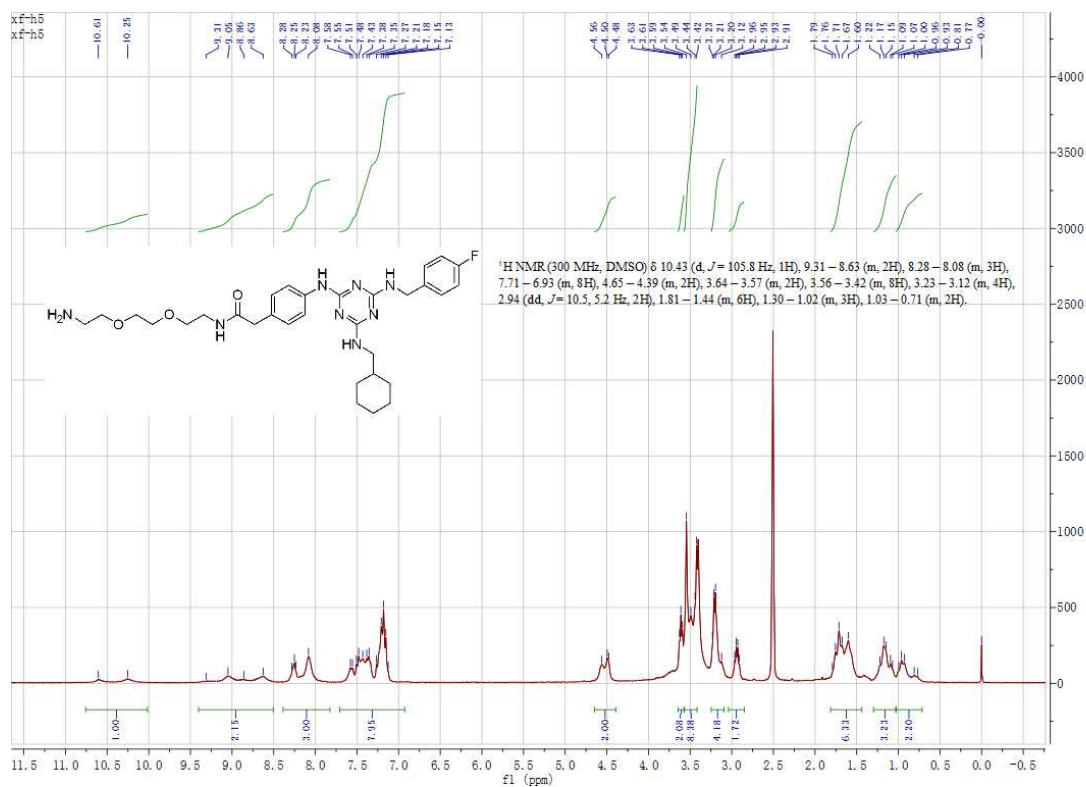

$^1\text{H}$ -NMR of 8

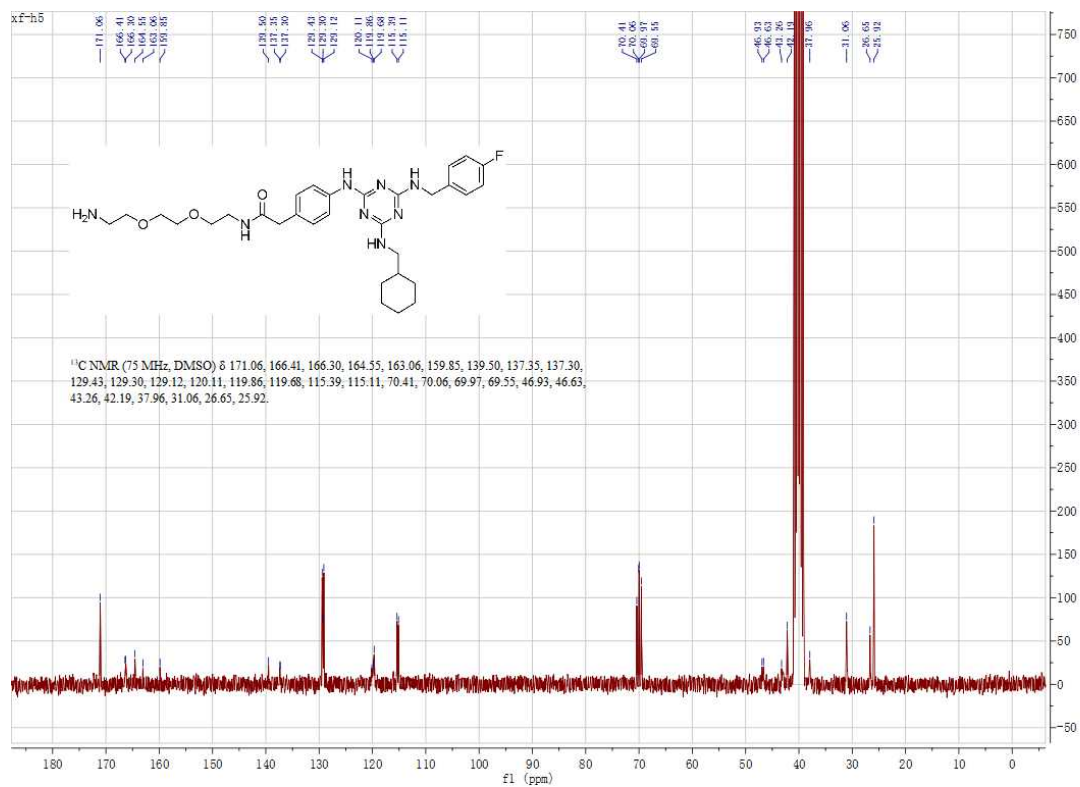

$^{13}\text{C}$ -NMR of 8

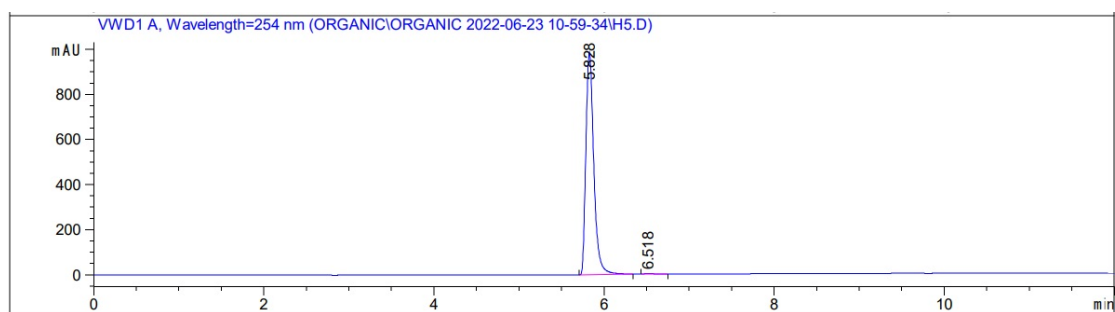

HPLC purity of 8

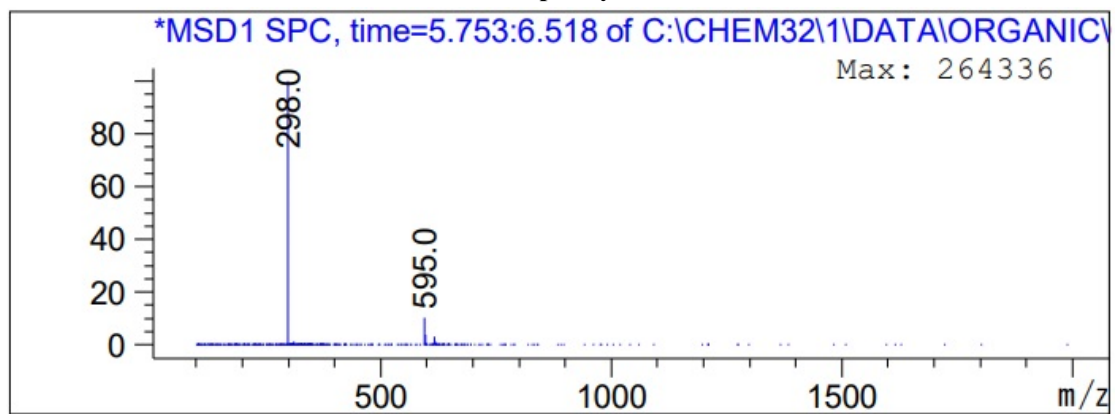

ESI-MS of 8



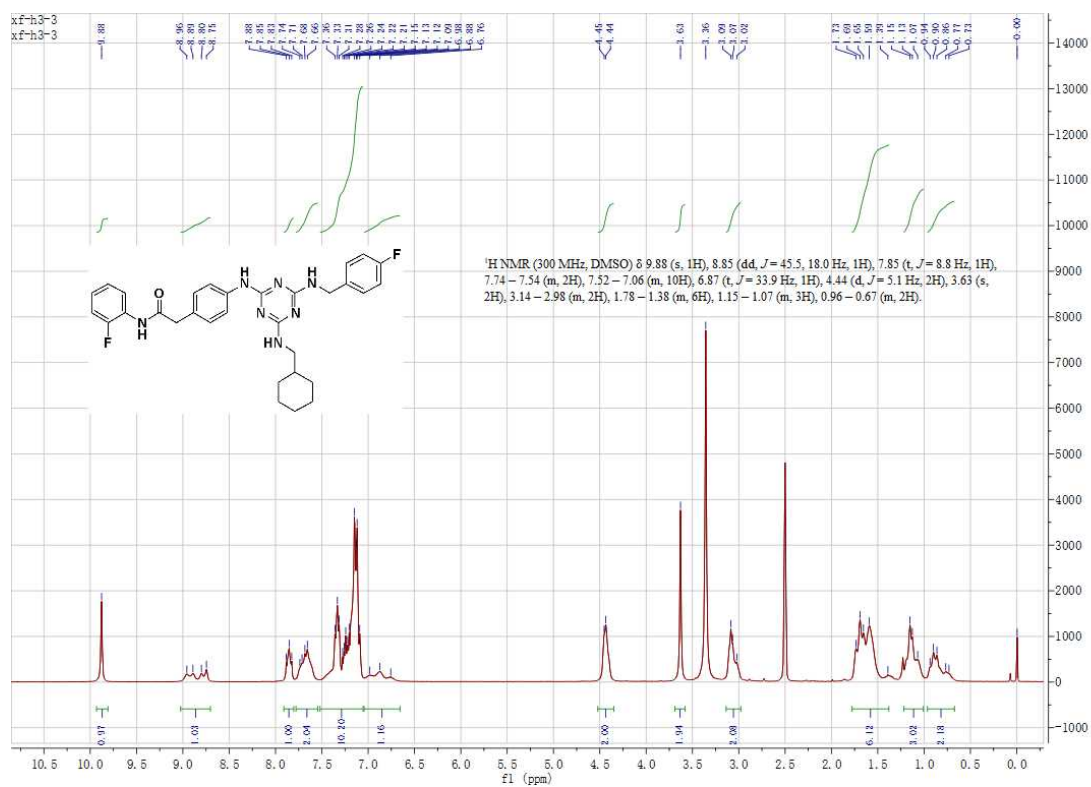

**<sup>1</sup>H-NMR of 8b**

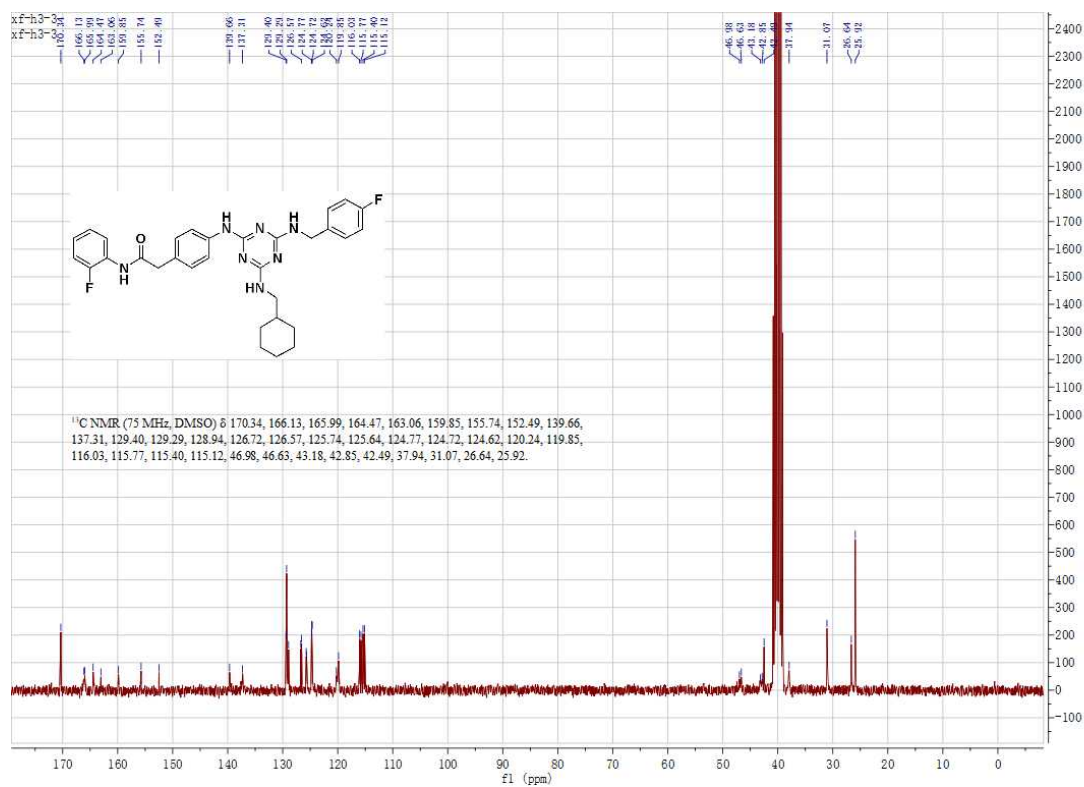

**<sup>13</sup>C-NMR of 8b**

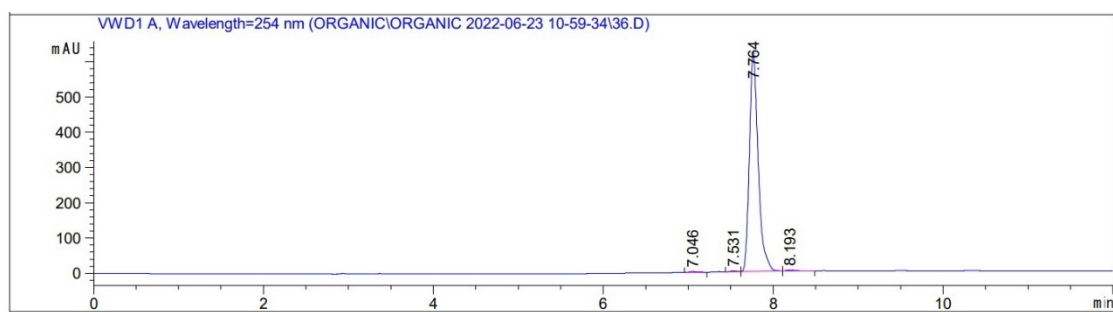

HPLC purity of 8b

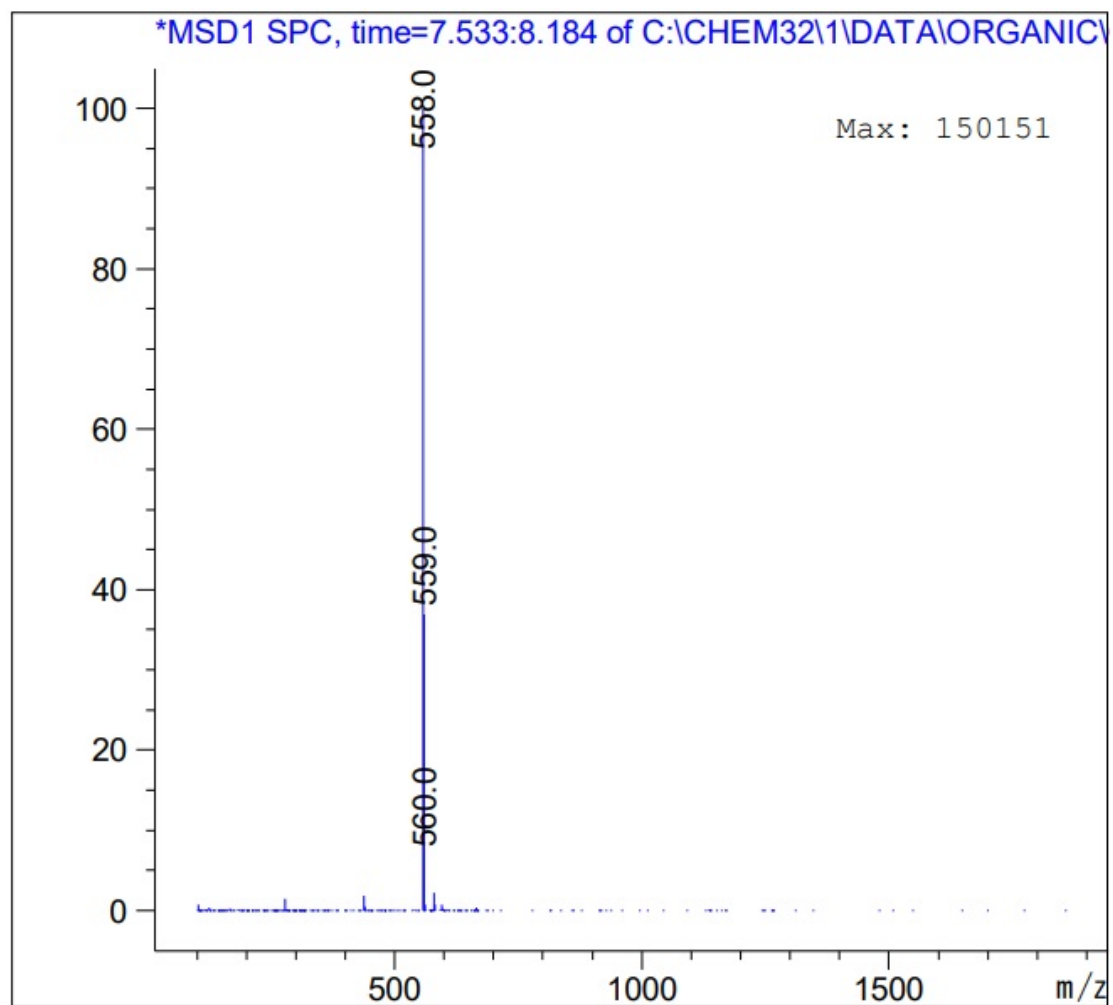

ESI-MS of 8b

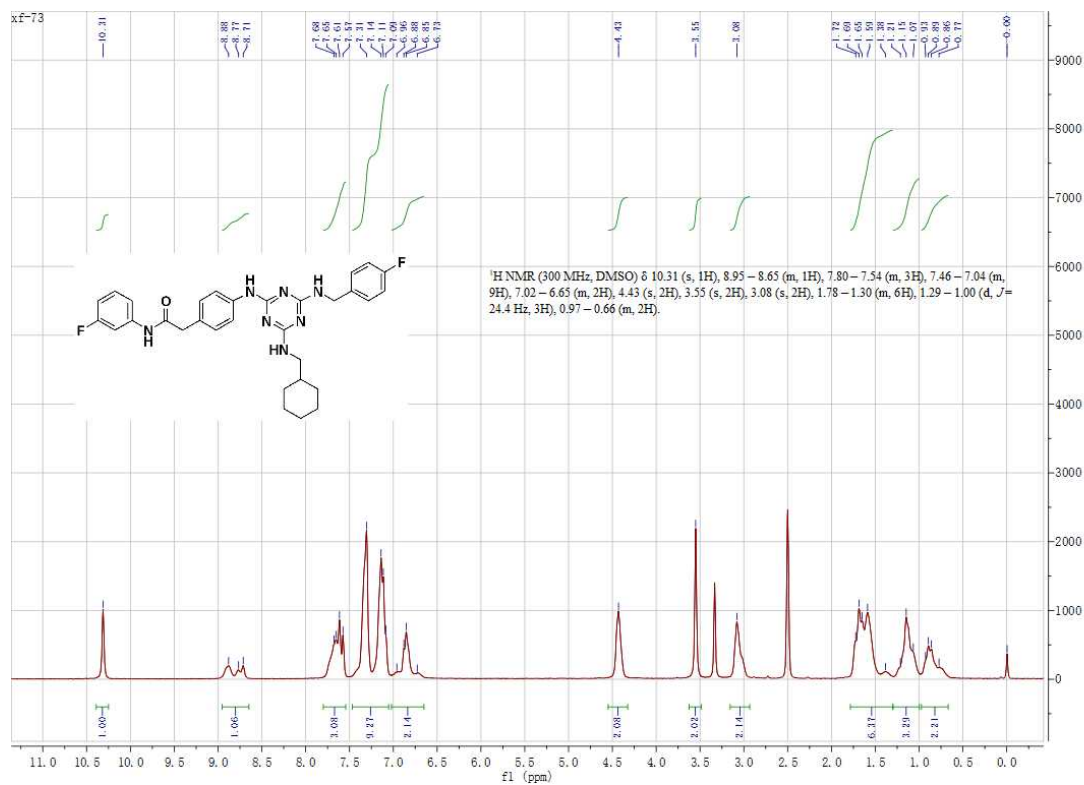

<sup>1</sup>H-NMR of 8c

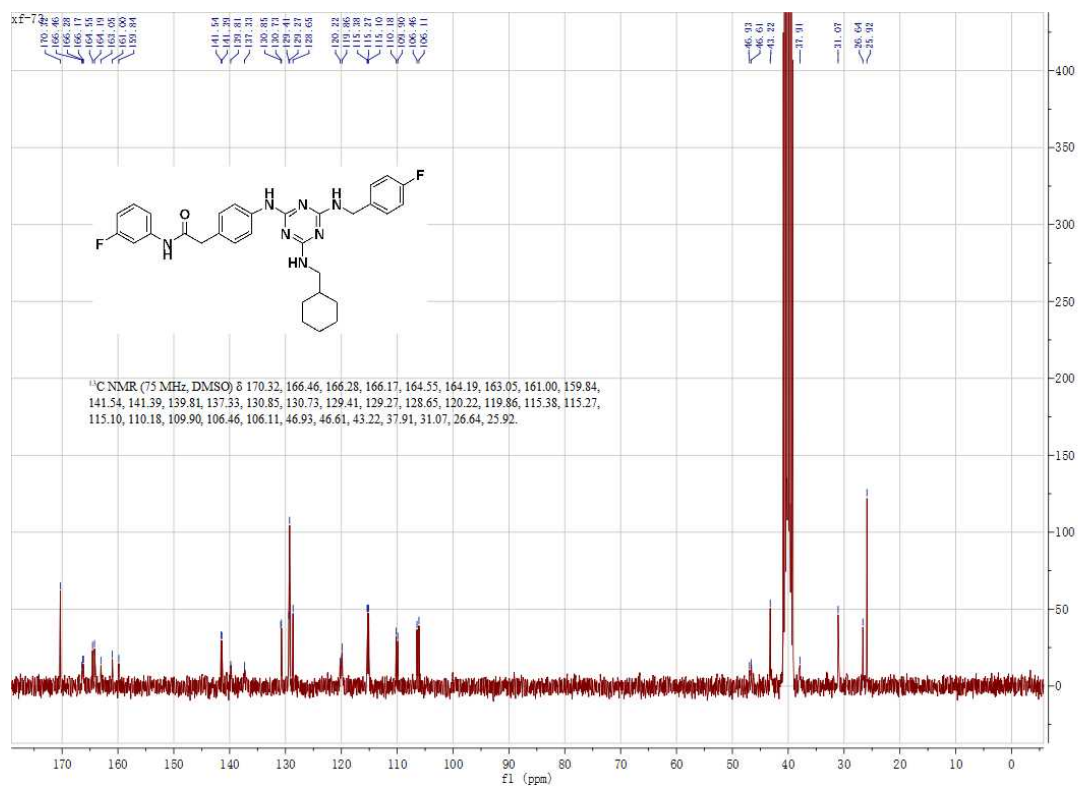

<sup>13</sup>C-NMR of 8c

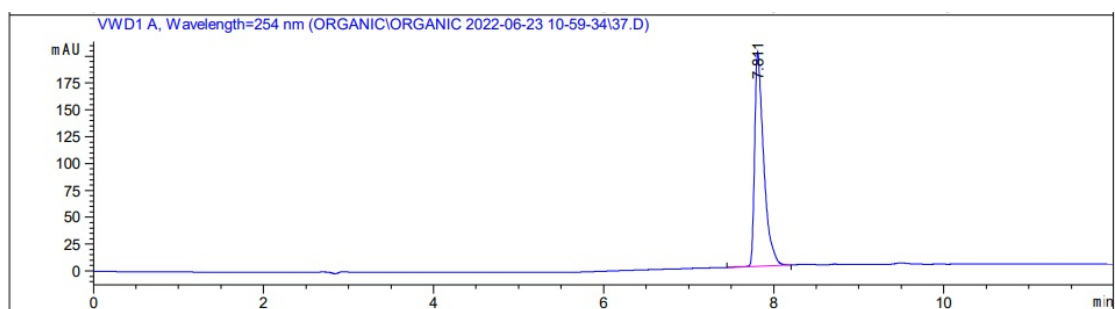

HPLC purity of 8c

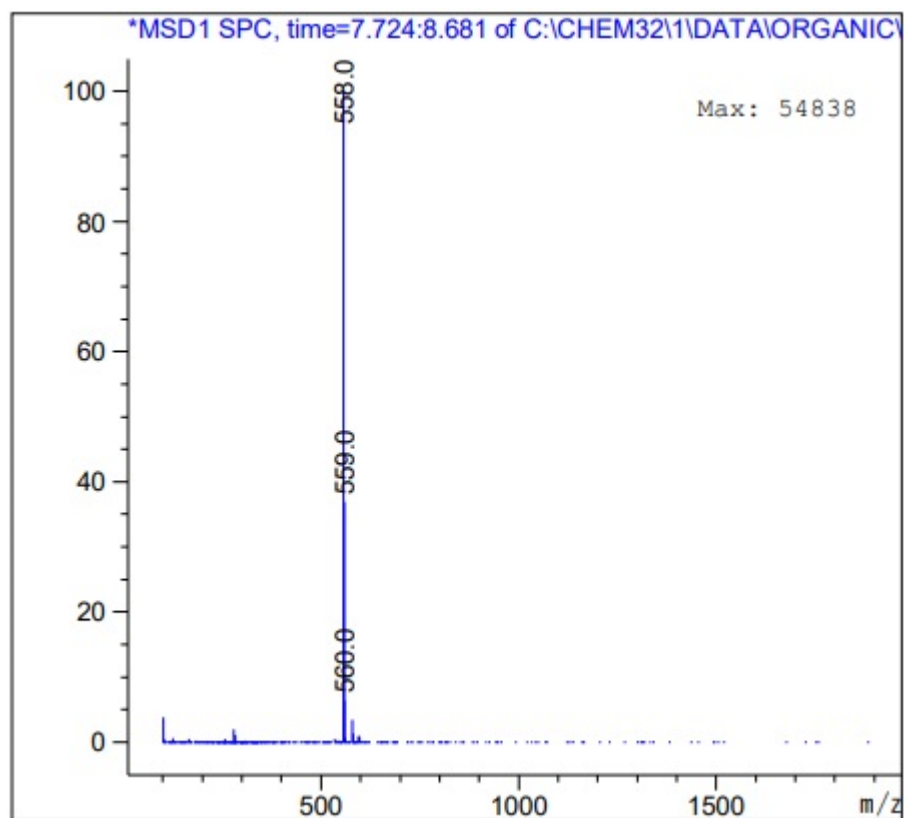

ESI-MS of 8c

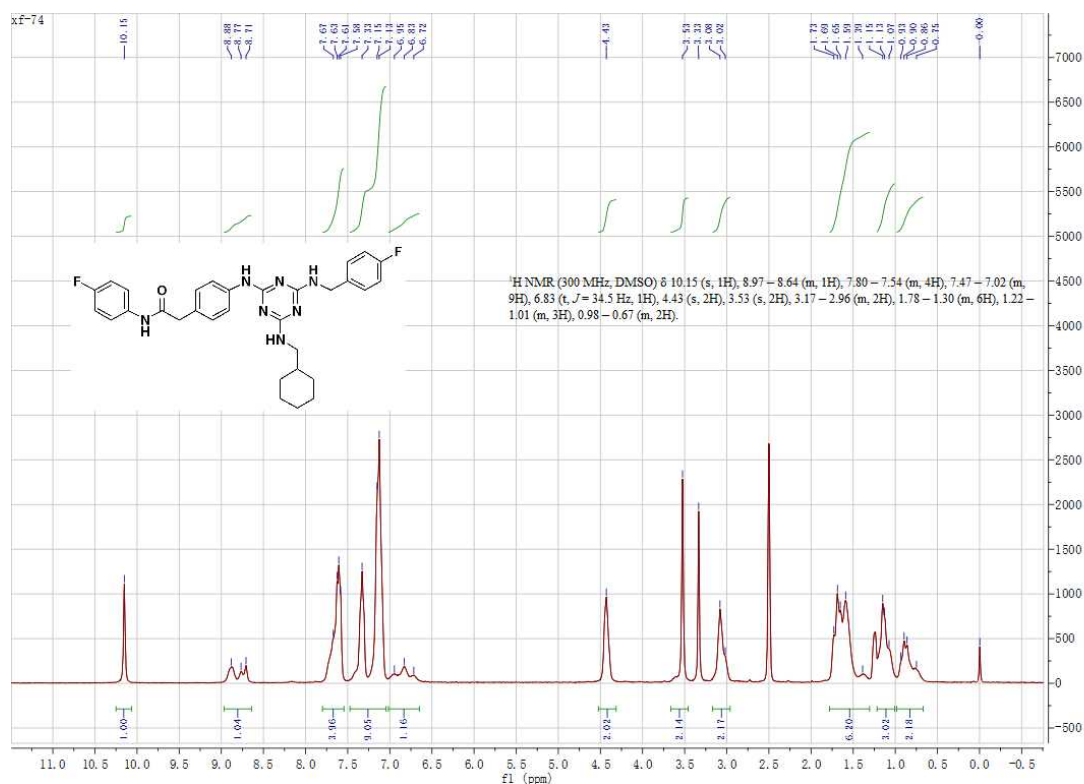

<sup>1</sup>H-NMR of 8d

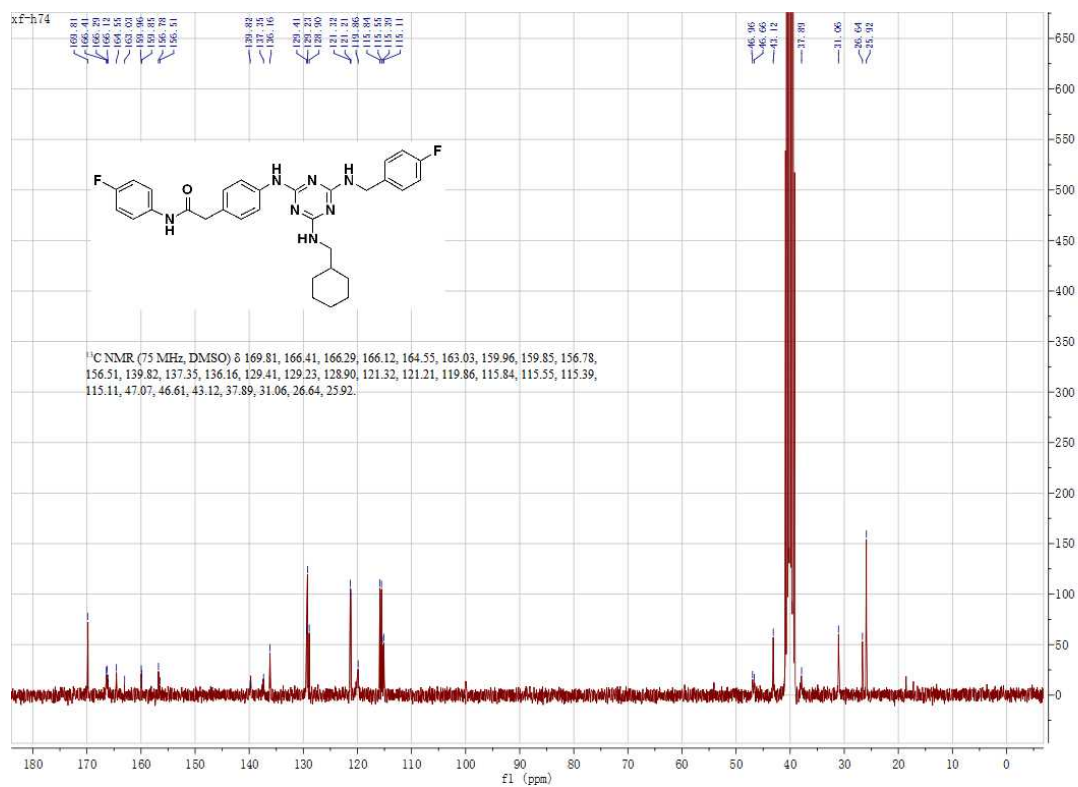

<sup>13</sup>C-NMR of 8d

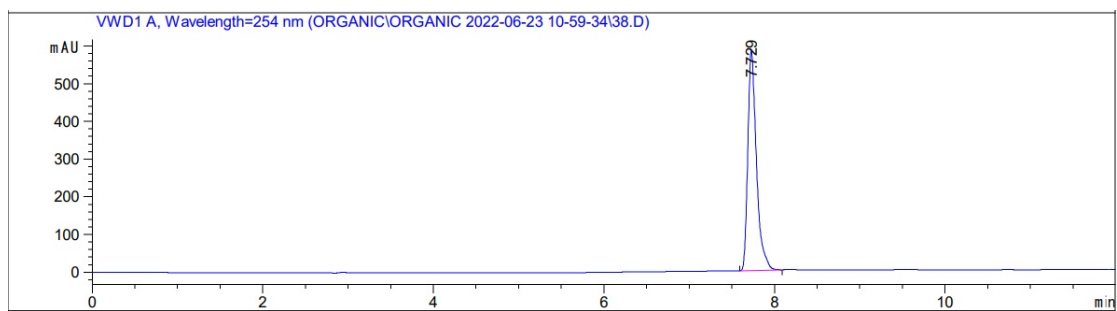

HPLC purity of 8d

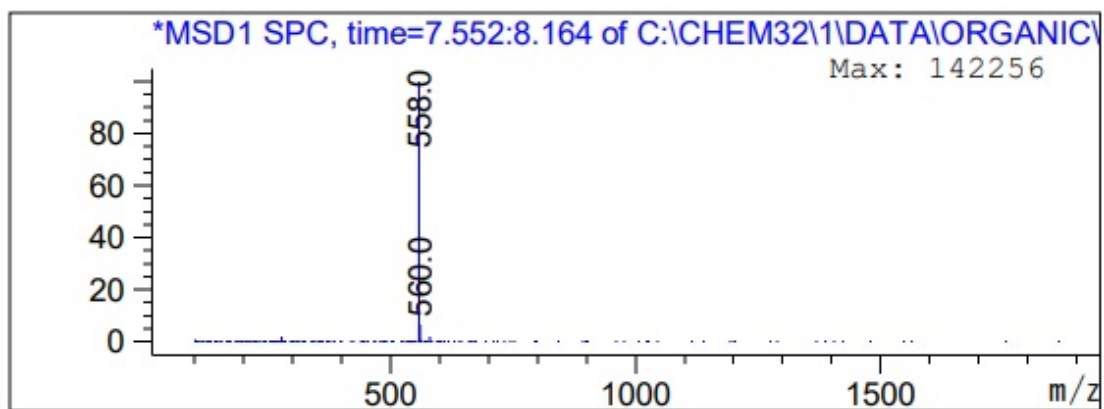

ESI-MS of 8d

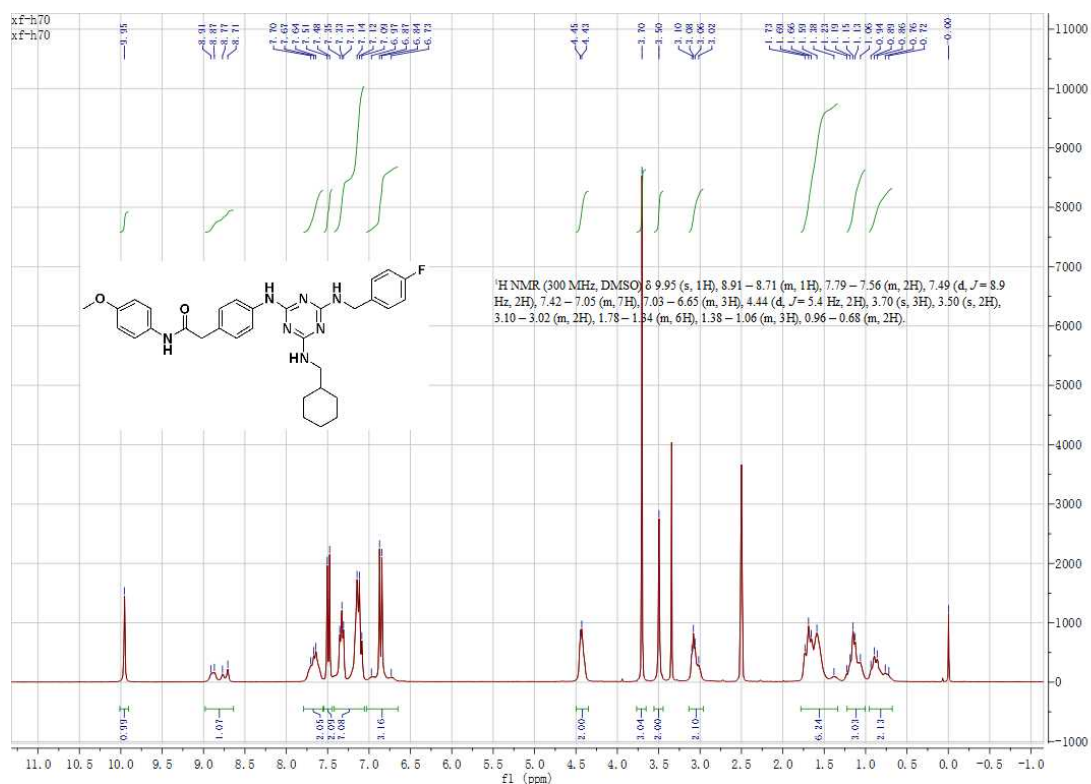

<sup>1</sup>H-NMR of 8e

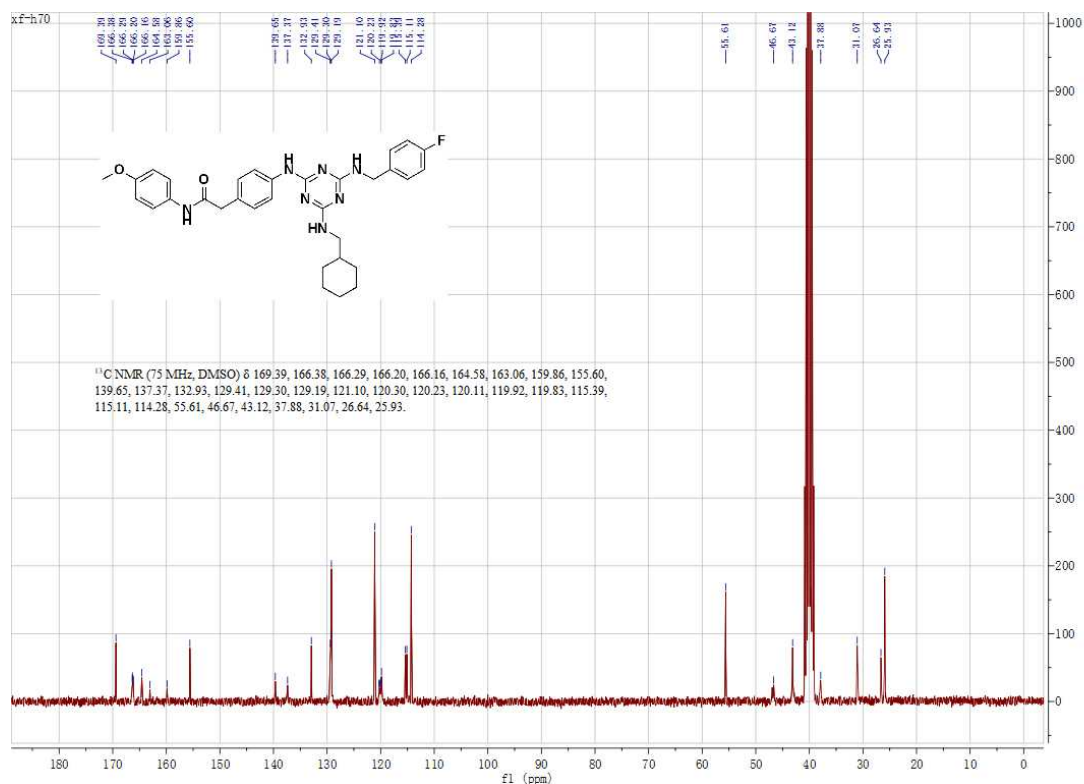

<sup>13</sup>C-NMR of 8e

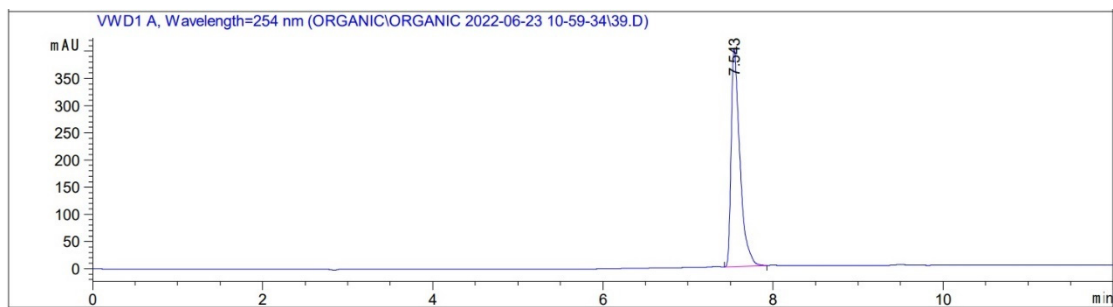

HPLC purity of 8e

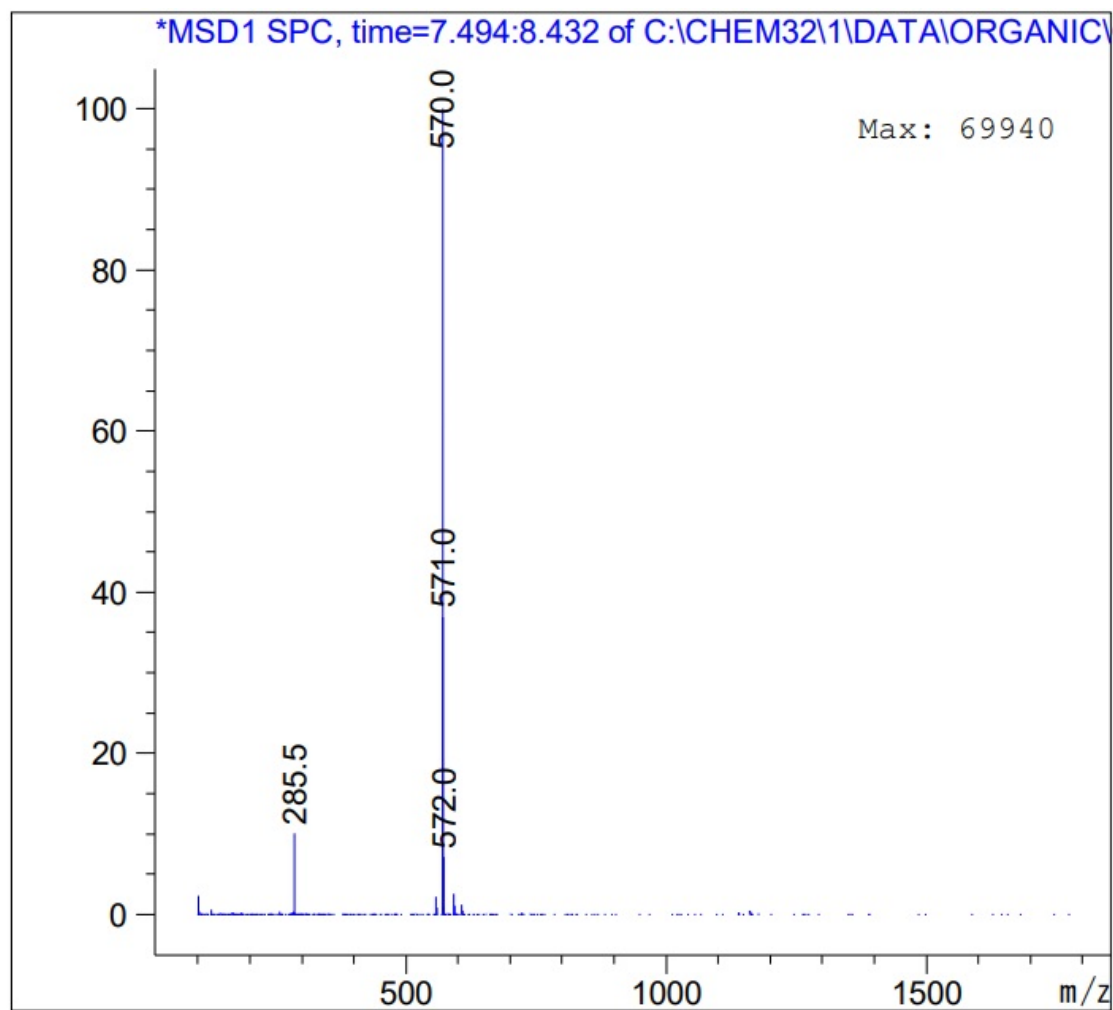

ESI-MS of 8e



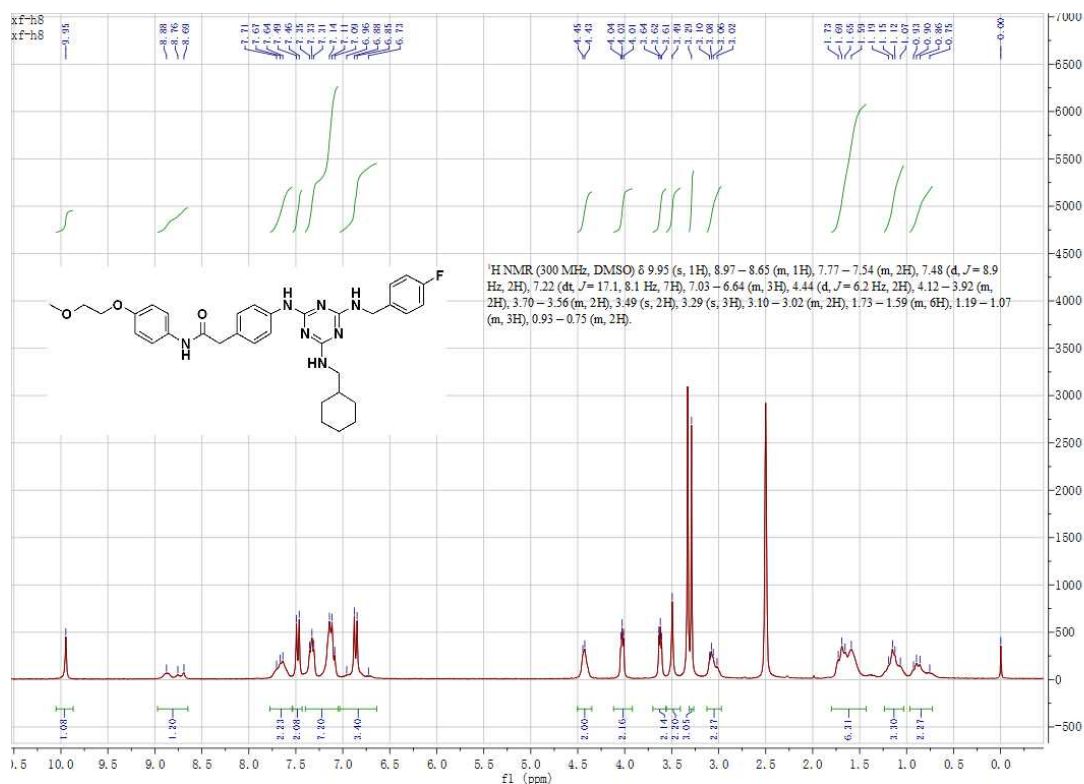

**<sup>1</sup>H-NMR of 8f**

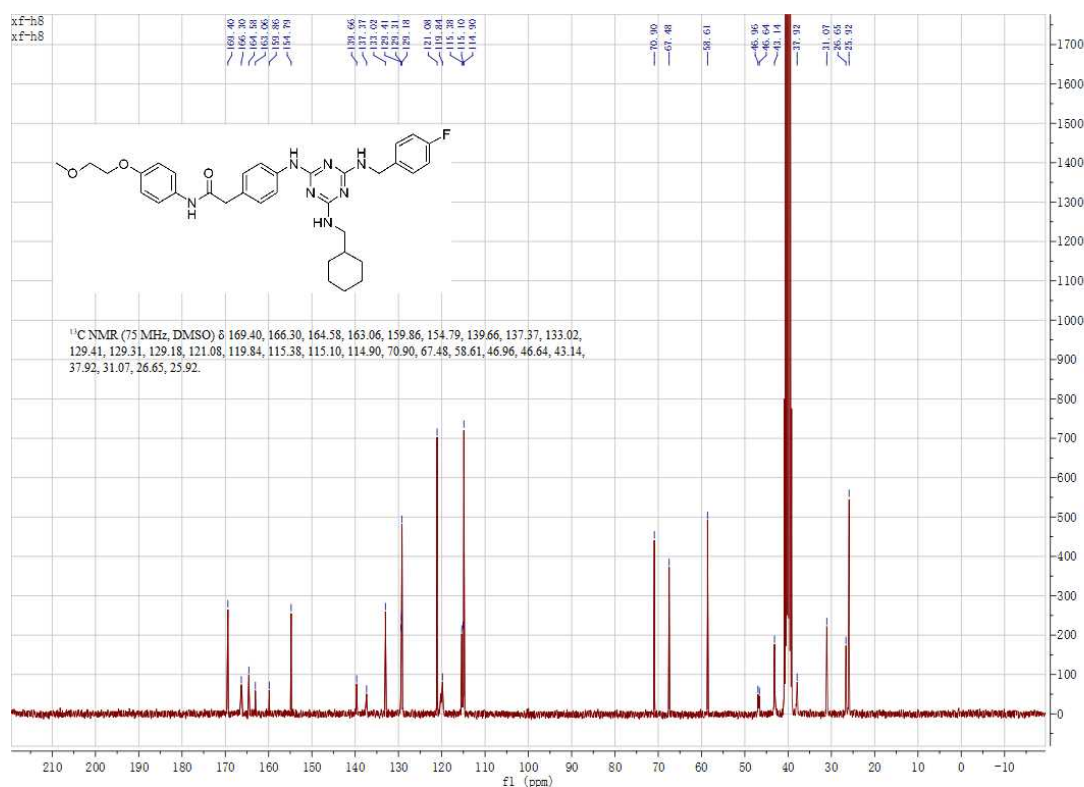

**<sup>13</sup>C-NMR of 8f**

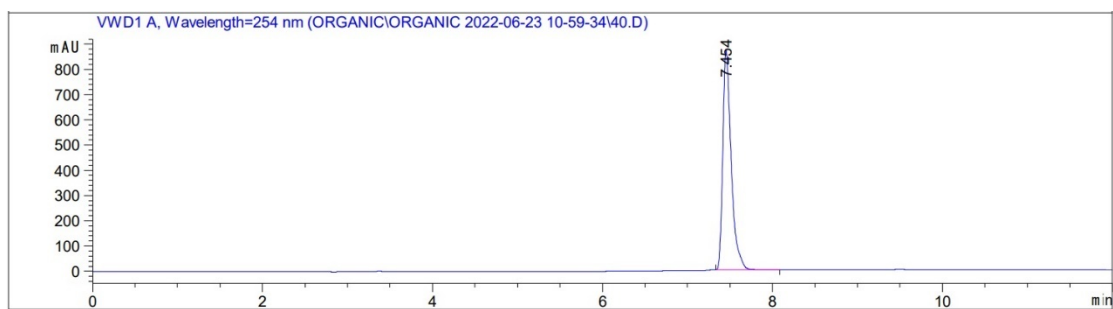

HPLC purity of 8f

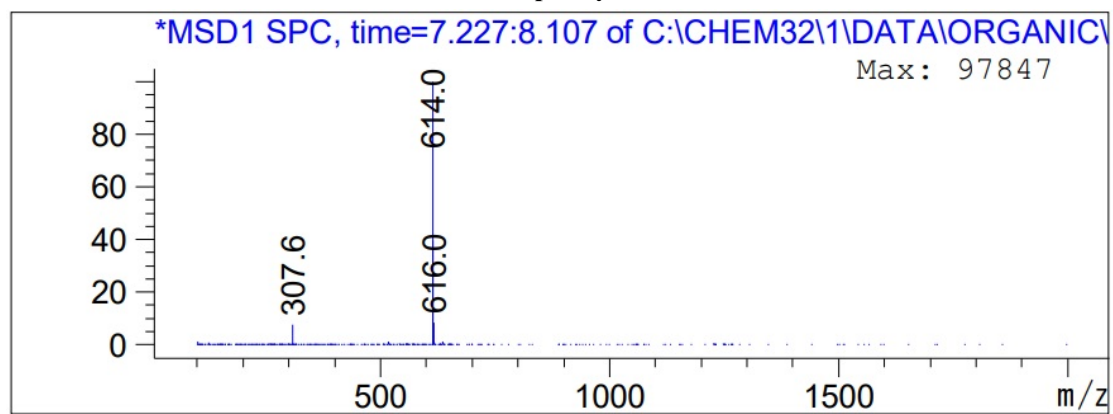

ESI-MS of 8f

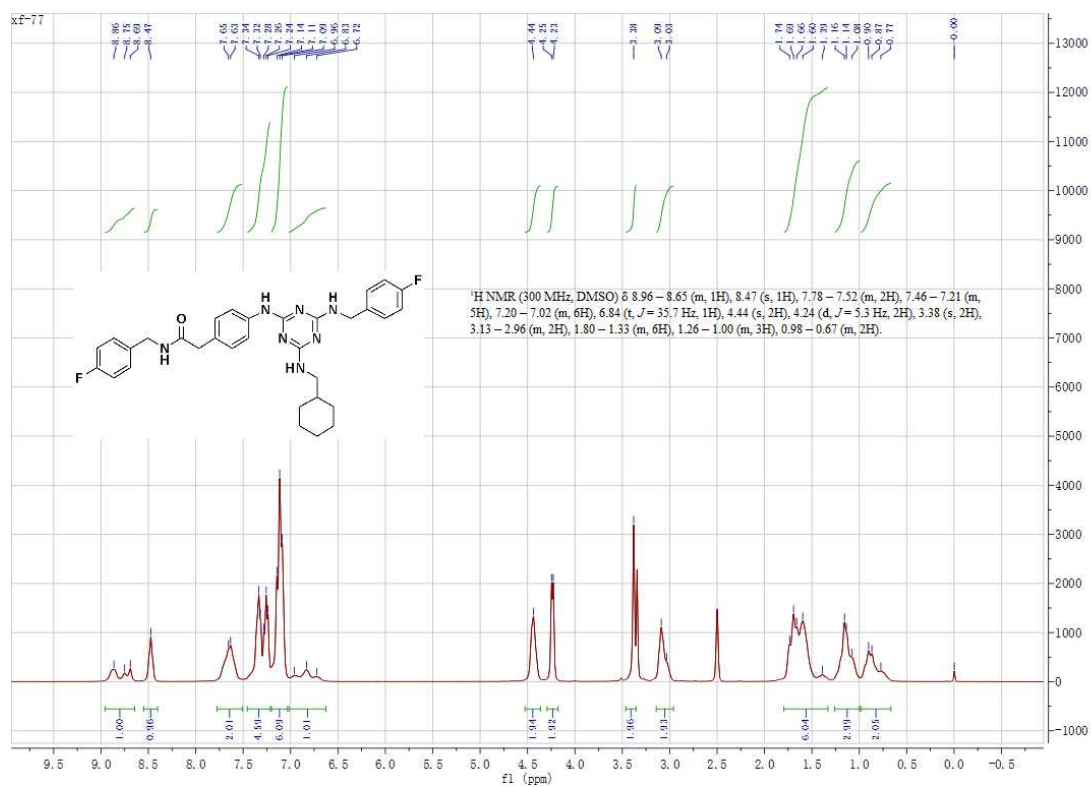

<sup>1</sup>H-NMR of 8g

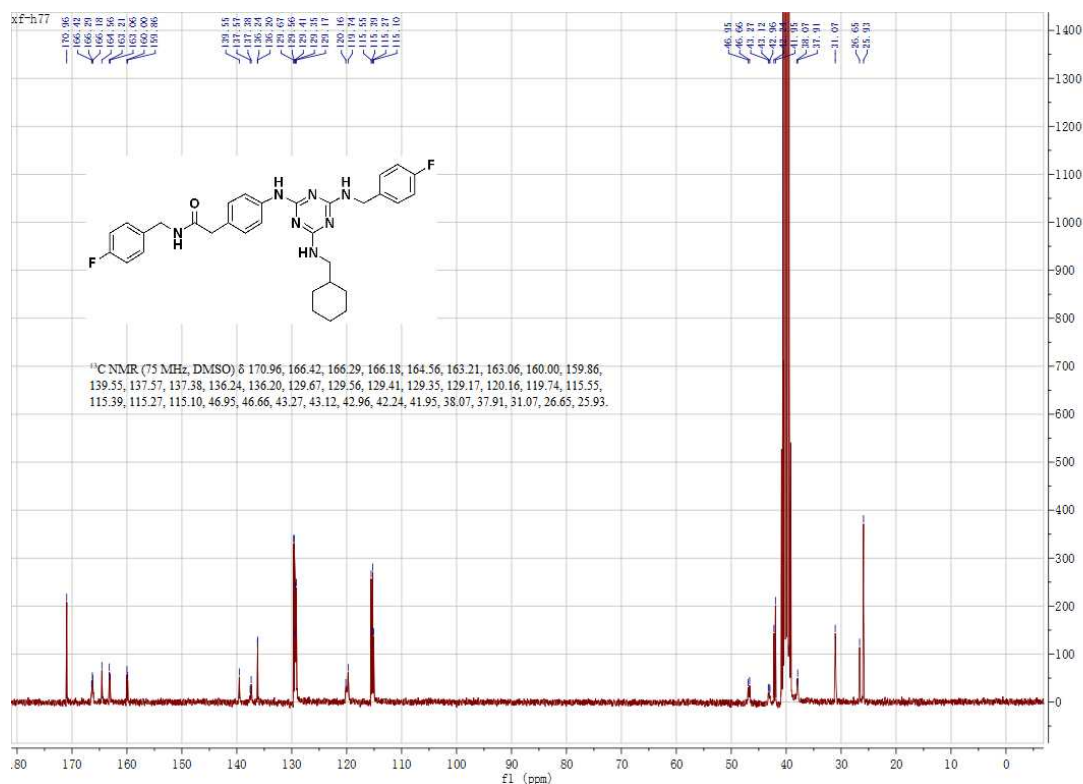

<sup>13</sup>C-NMR of 8g

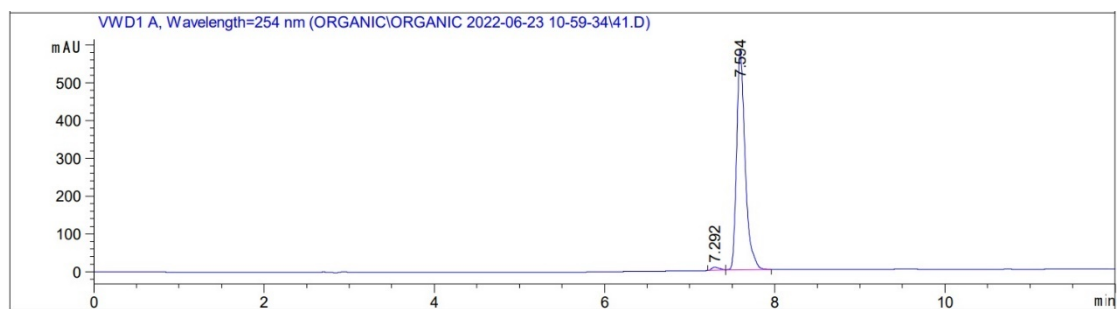

HPLC purity of 8g

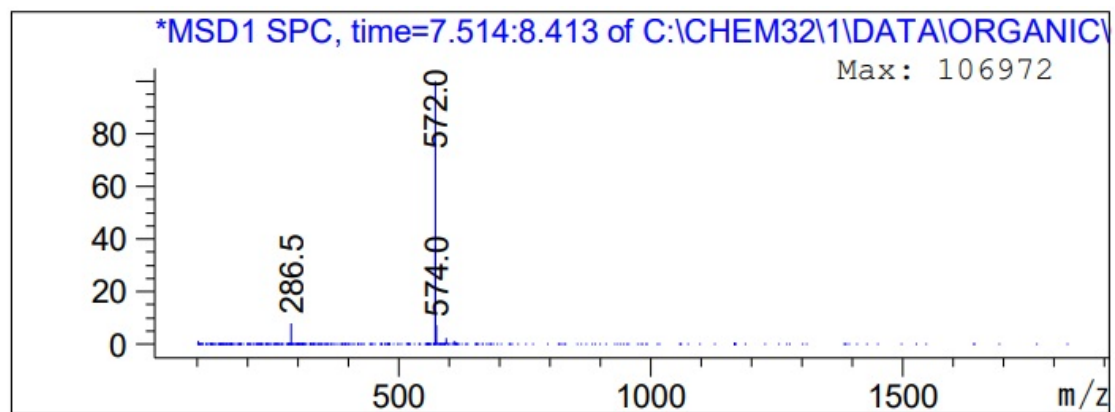

ESI-MS of 8g

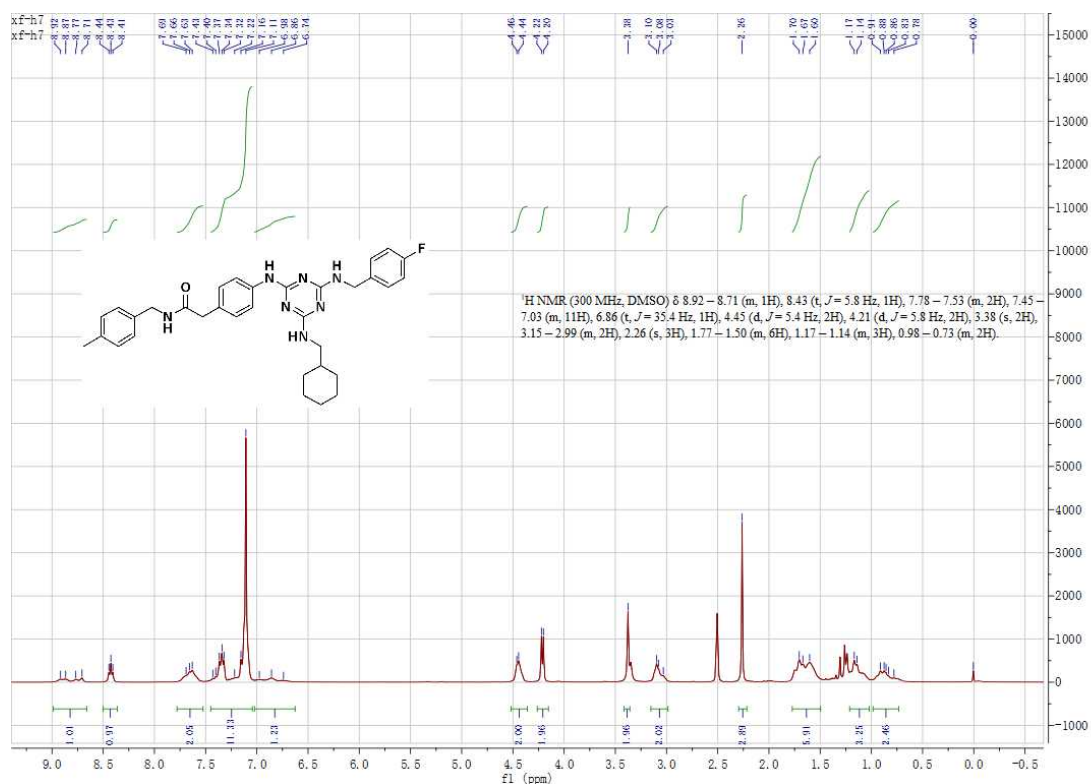

**<sup>1</sup>H-NMR of 8h**

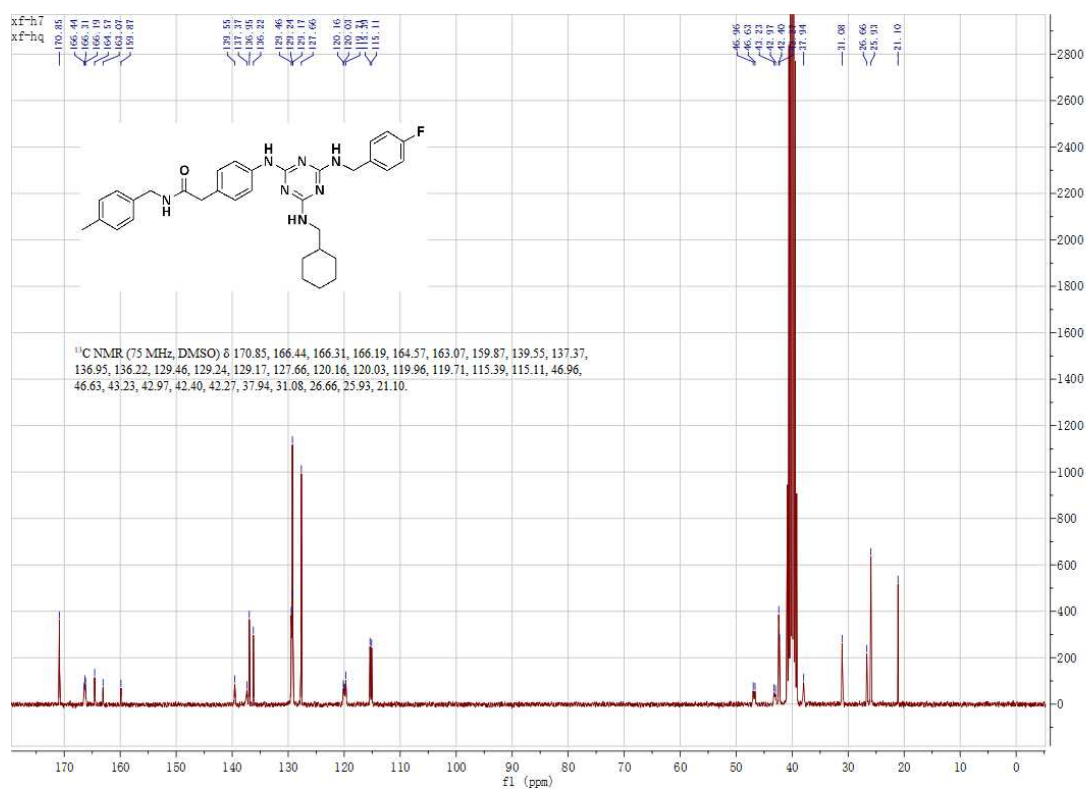

**<sup>13</sup>C-NMR of 8h**

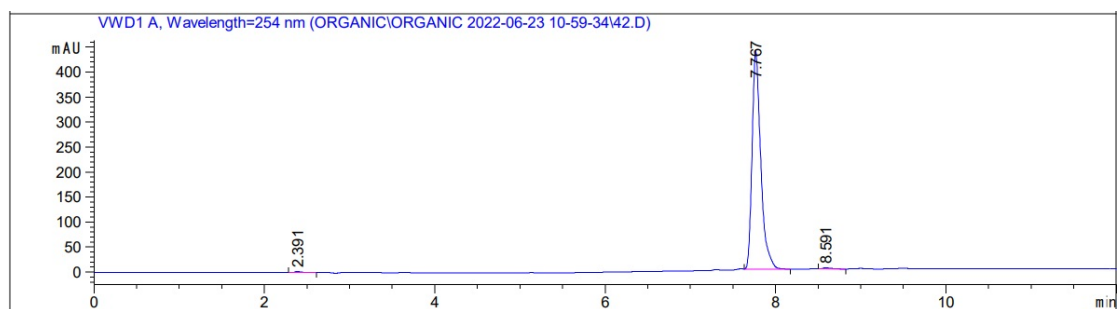

HPLC purity of 8h

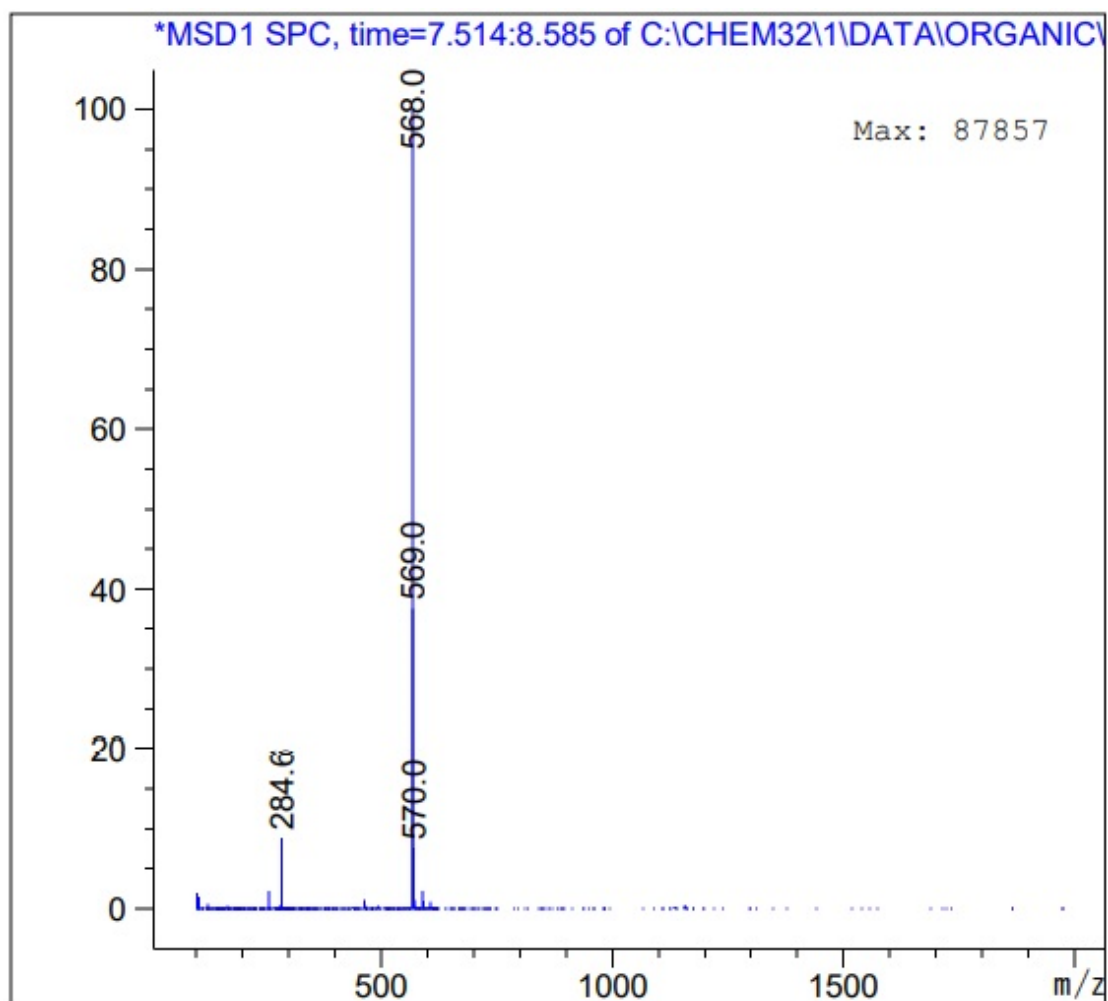

ESI-MS of 8h

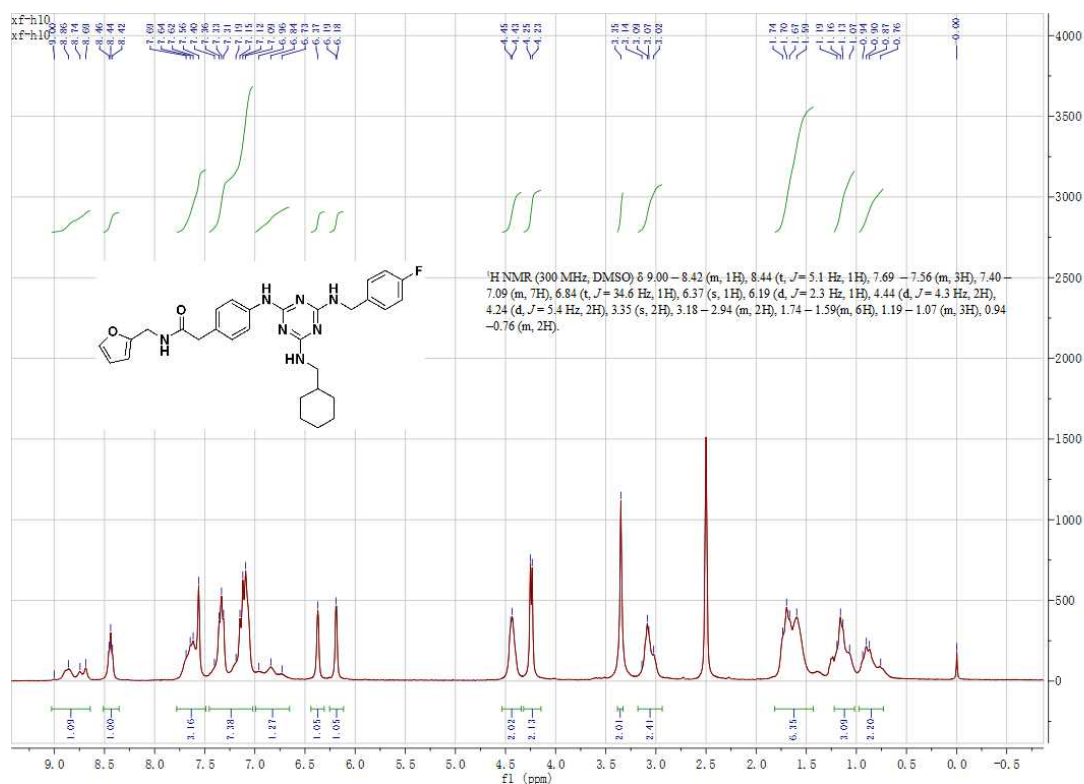

**<sup>1</sup>H-NMR of 8i**

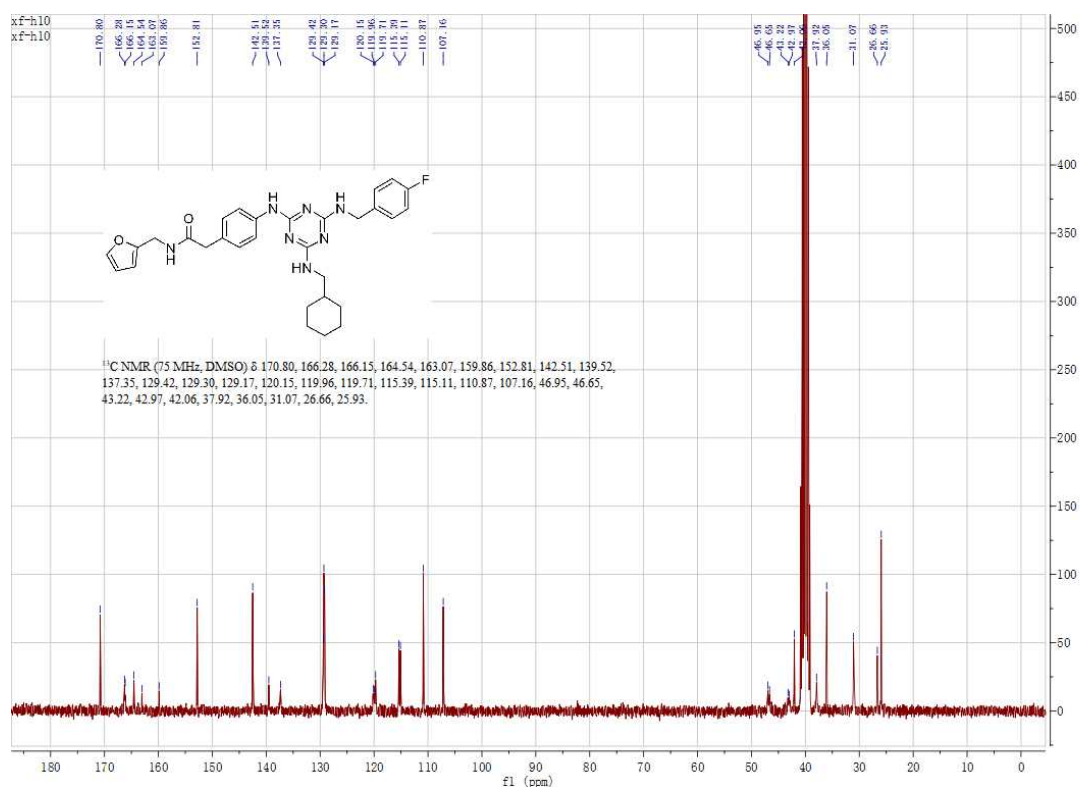

**<sup>13</sup>C-NMR of 8i**

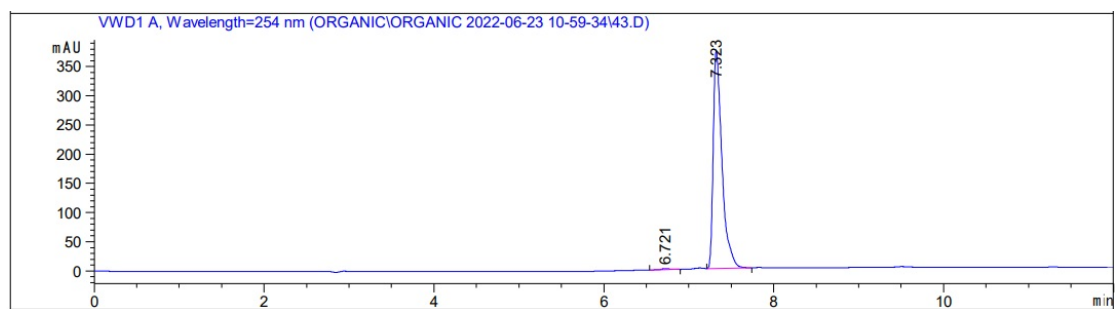

**HPLC purity of 8i**

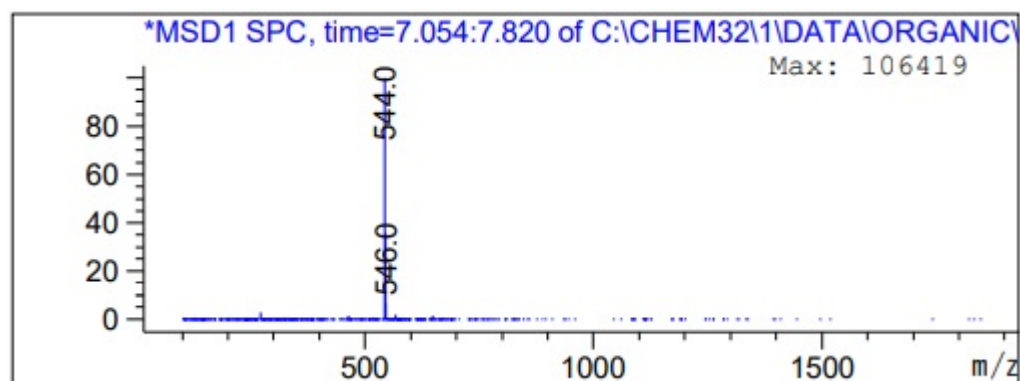

**ESI-MS of 8i**



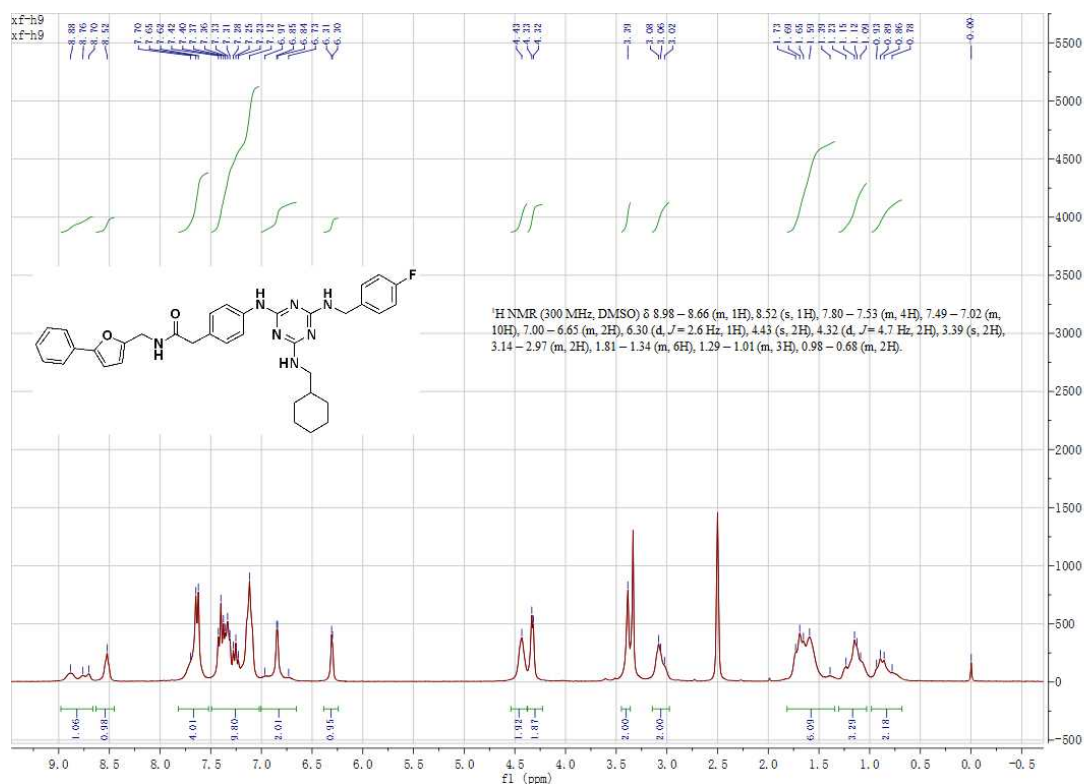

$^1\text{H}$ -NMR of 8j

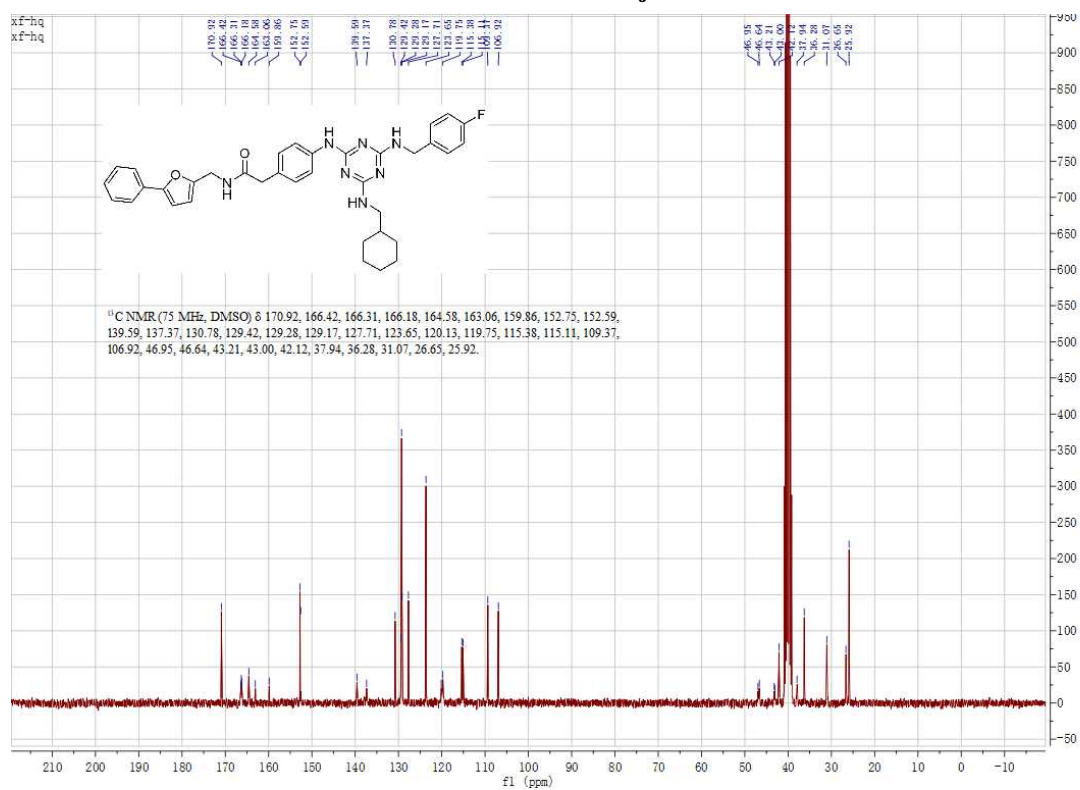

$^{13}\text{C}$ -NMR of 8j

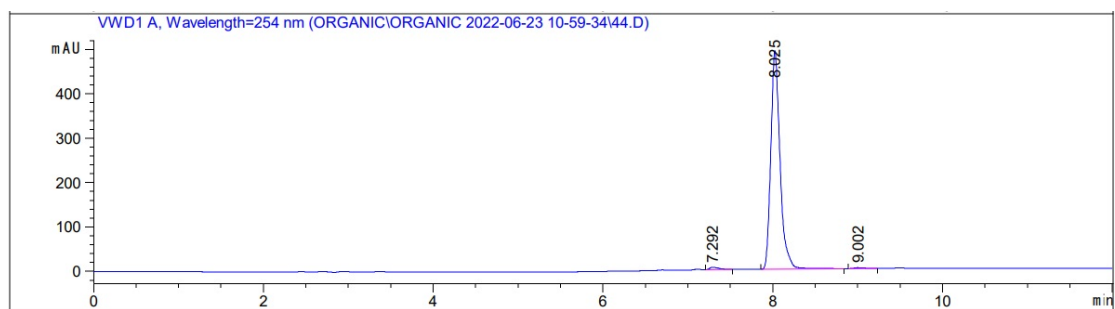

HPLC purity of 8j

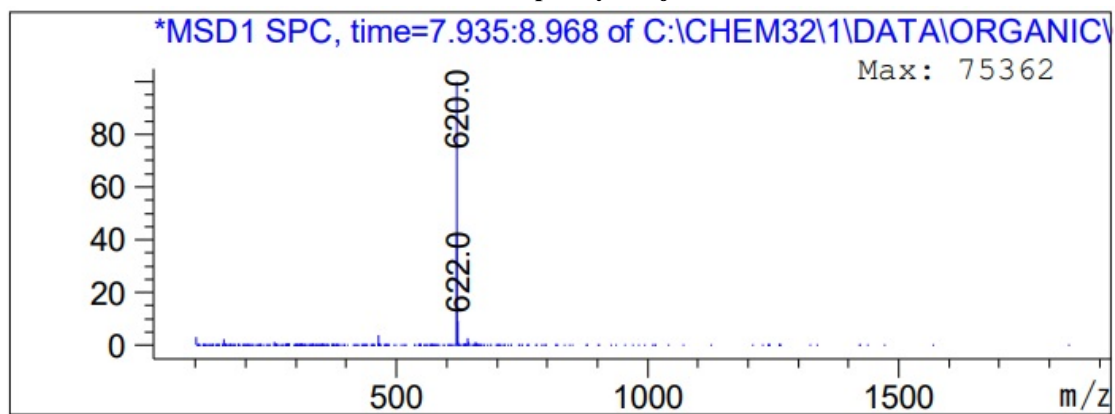

ESI-MS of 8j

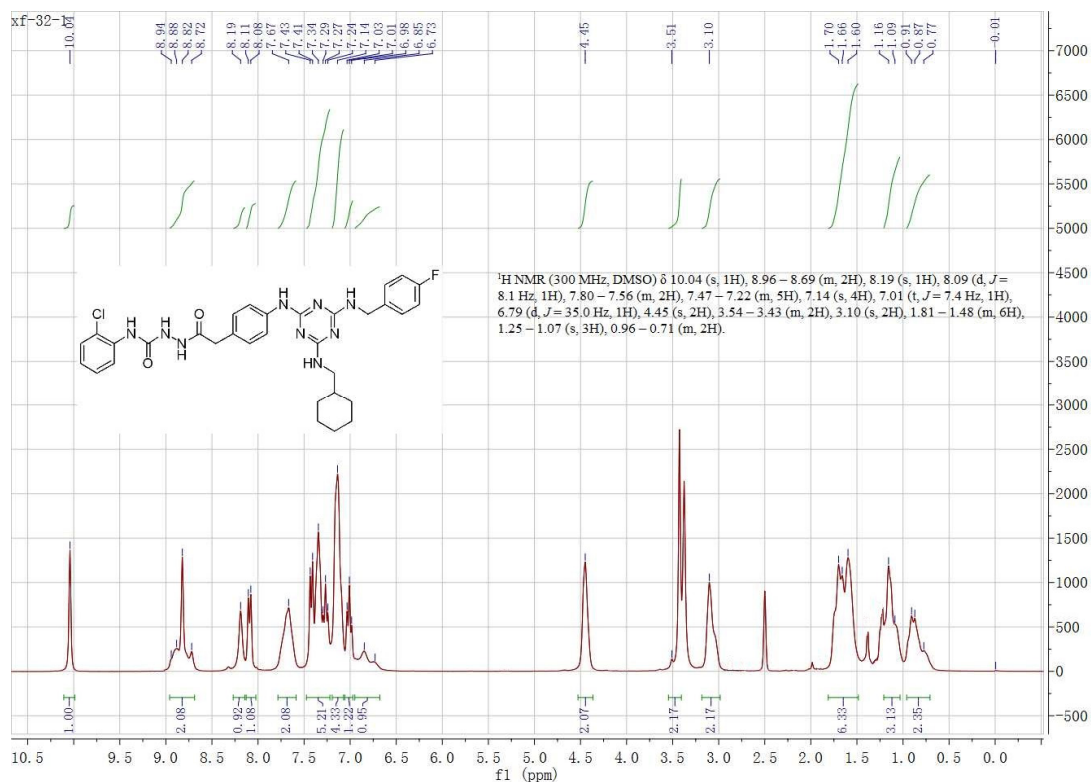

$^1\text{H-NMR}$  of 9a

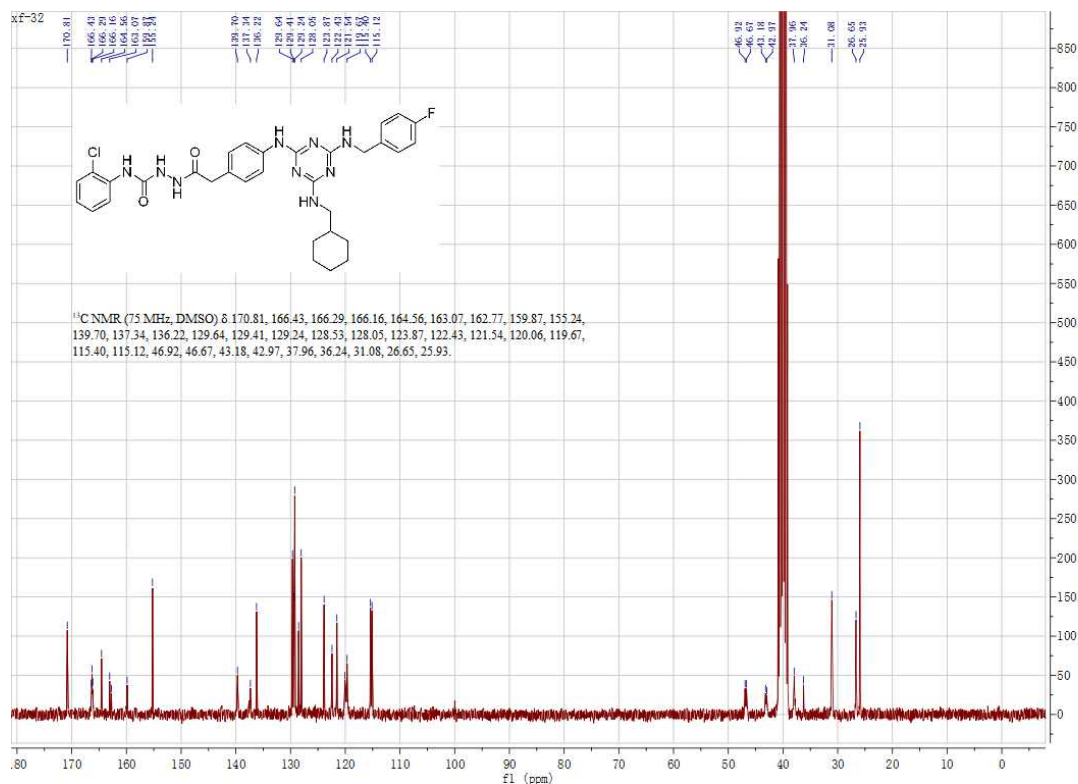

$^{13}\text{C-NMR}$  of 9a

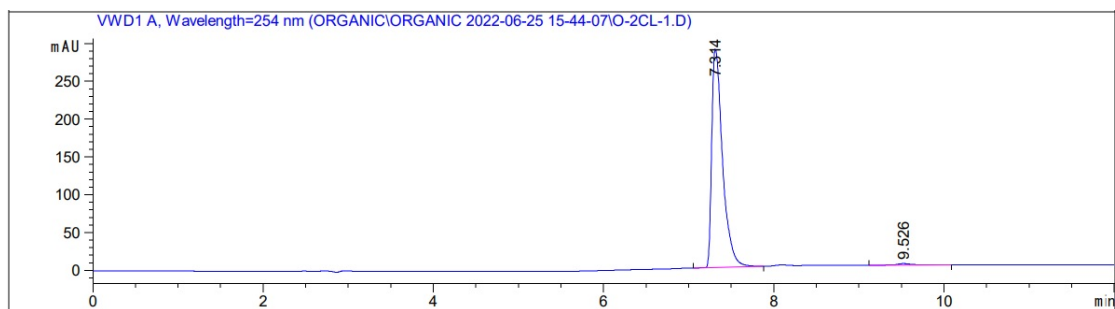

HPLC purity of 9a

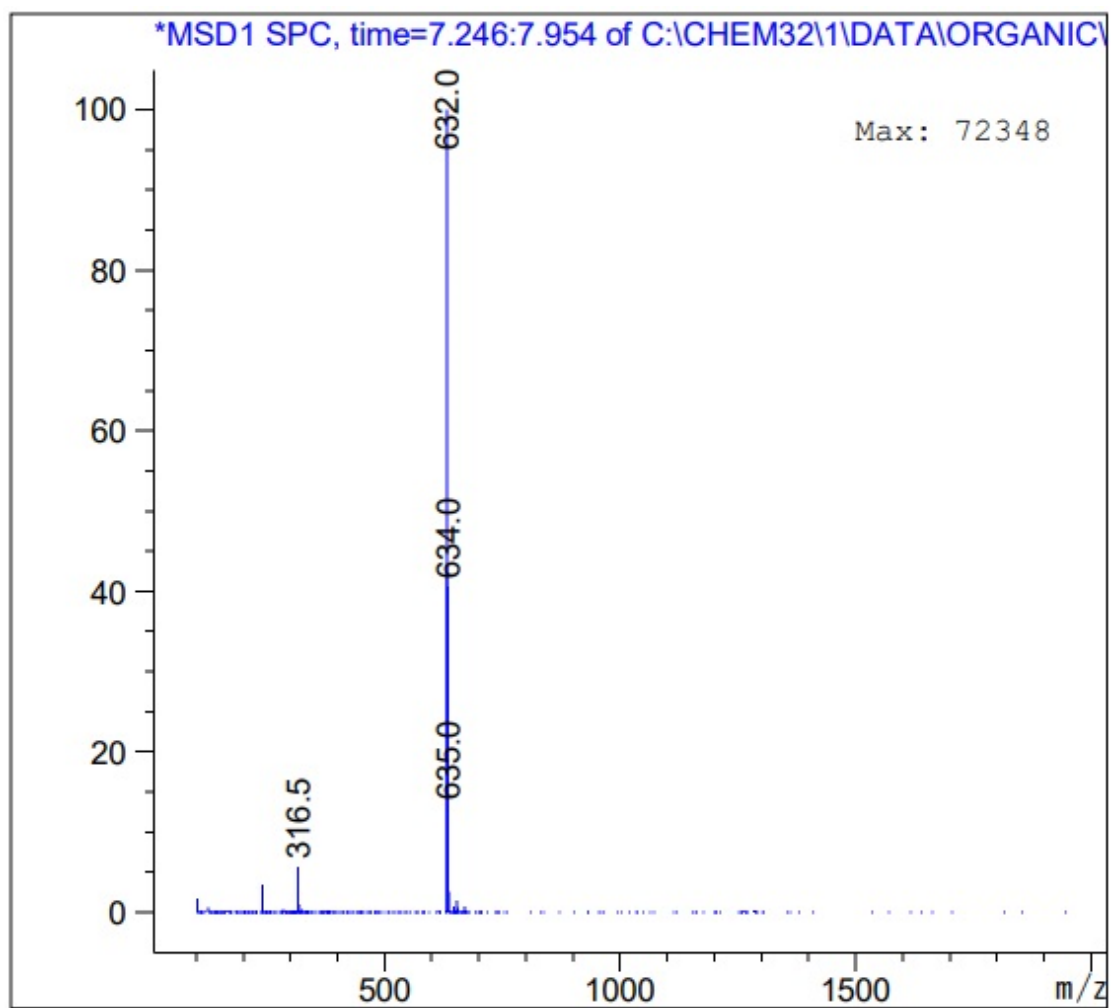

ESI-MS of 9a

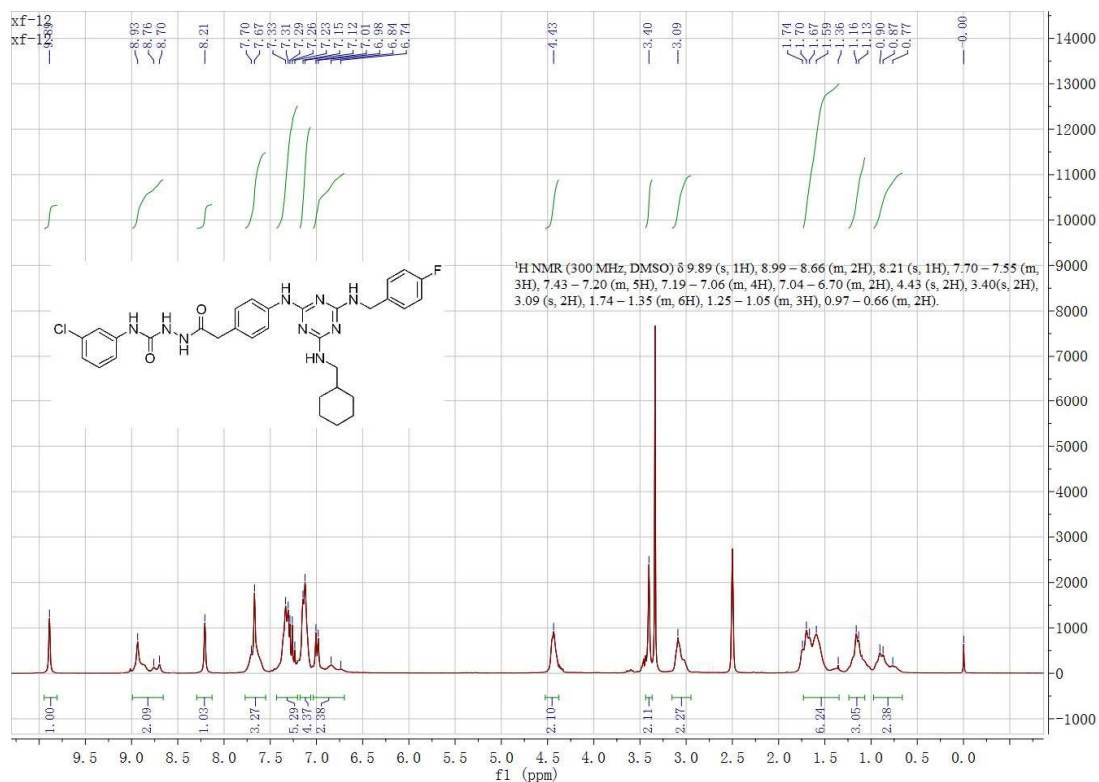

$^1\text{H}$ -NMR of 9b

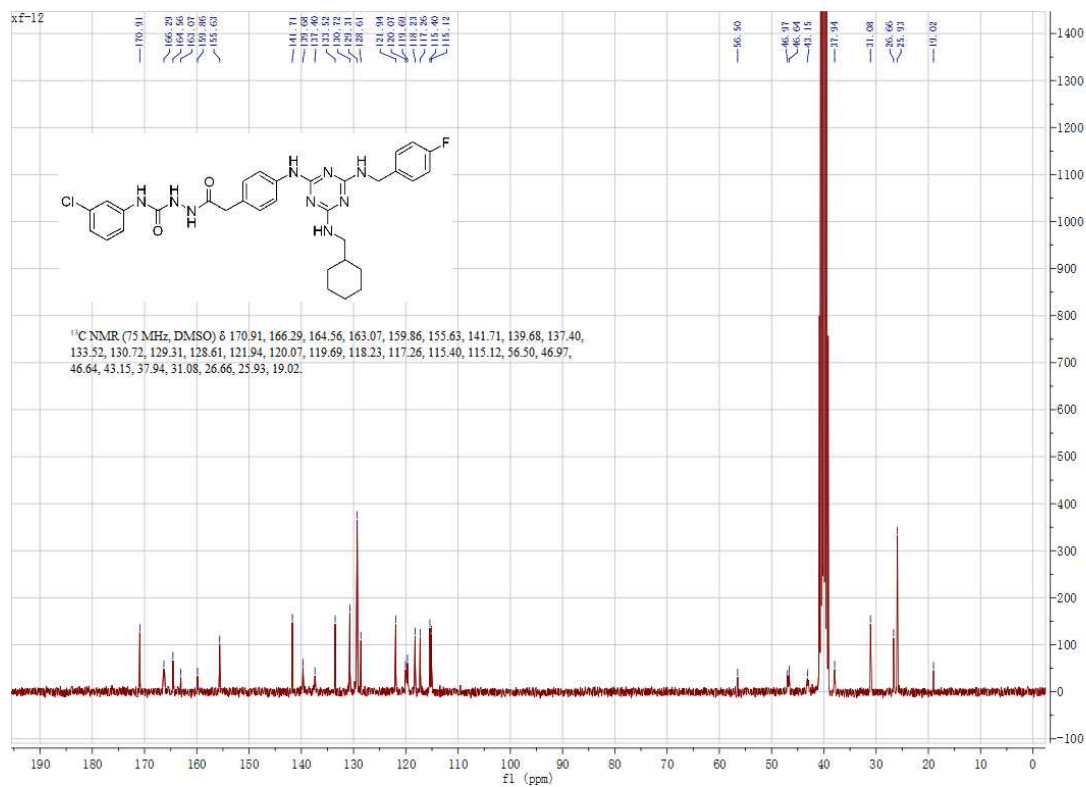

$^{13}\text{C}$ -NMR of 9b

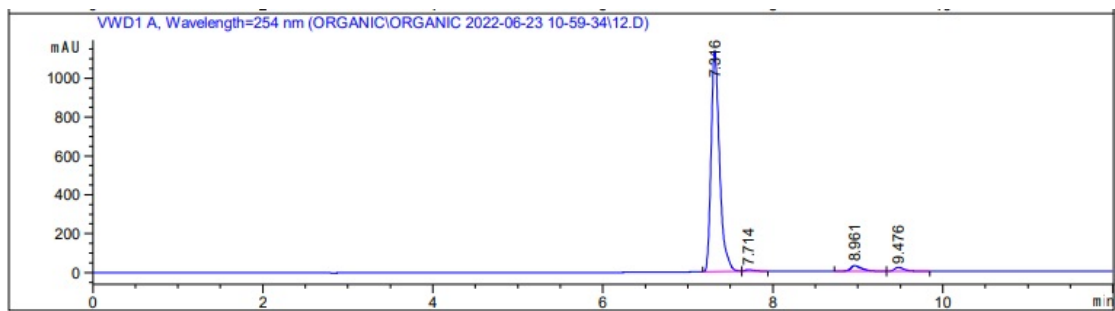

HPLC purity of 9b

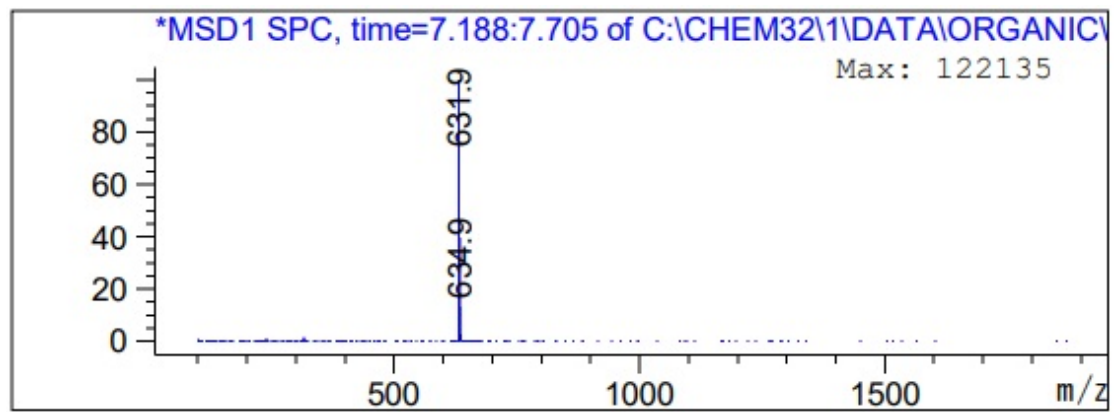

ESI-MS of 9b

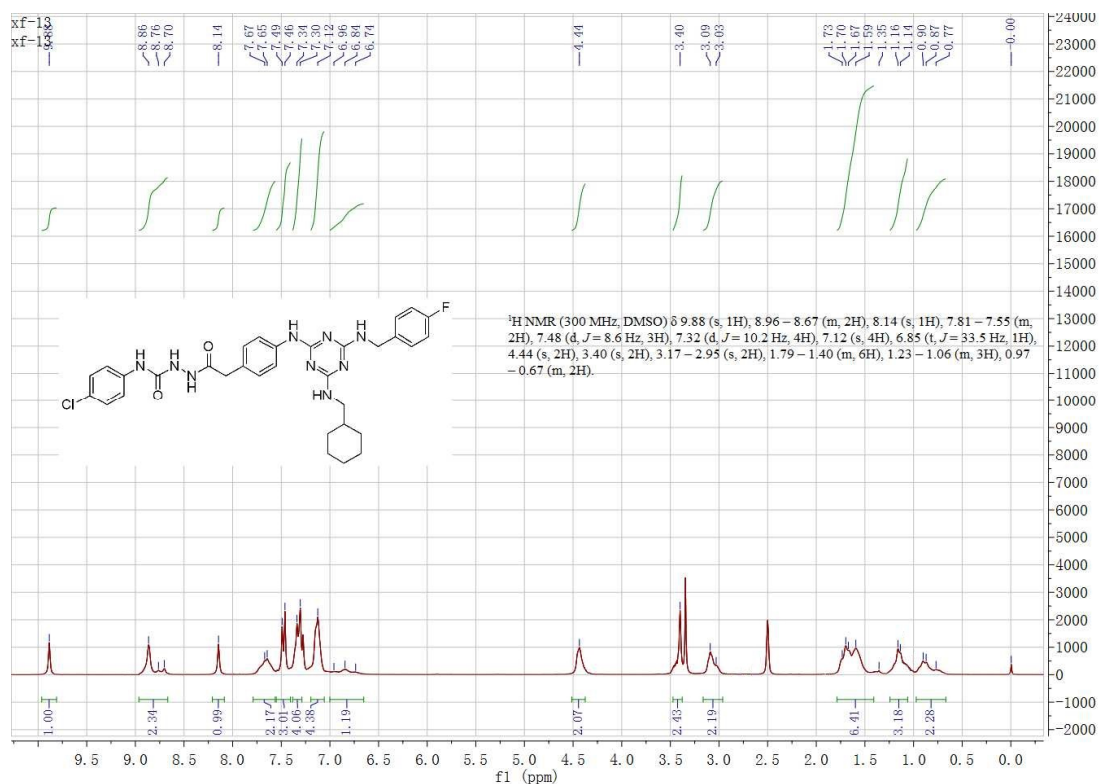

$^1\text{H}$ -NMR of 9c

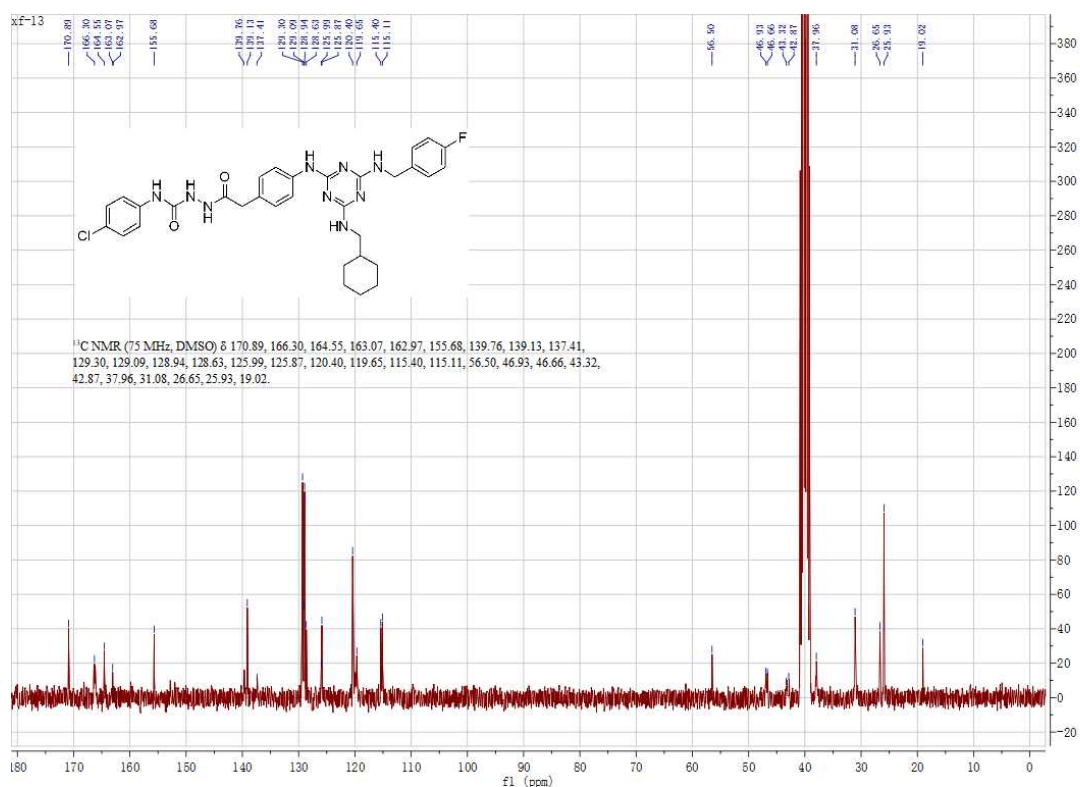

$^{13}\text{C}$ -NMR of 9c

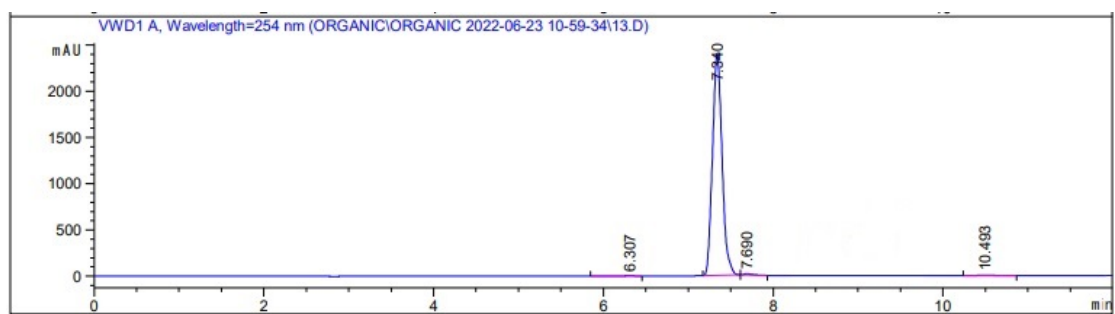

HPLC purity of 9c

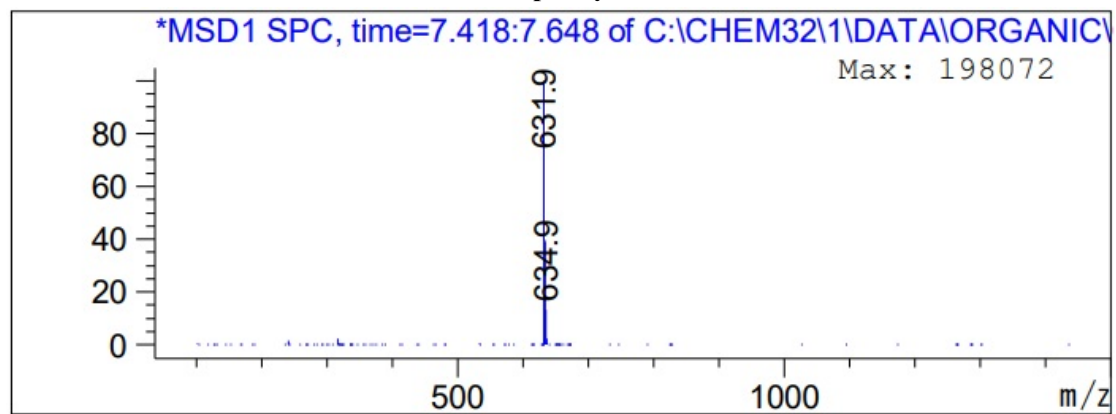

ESI-MS of 9c



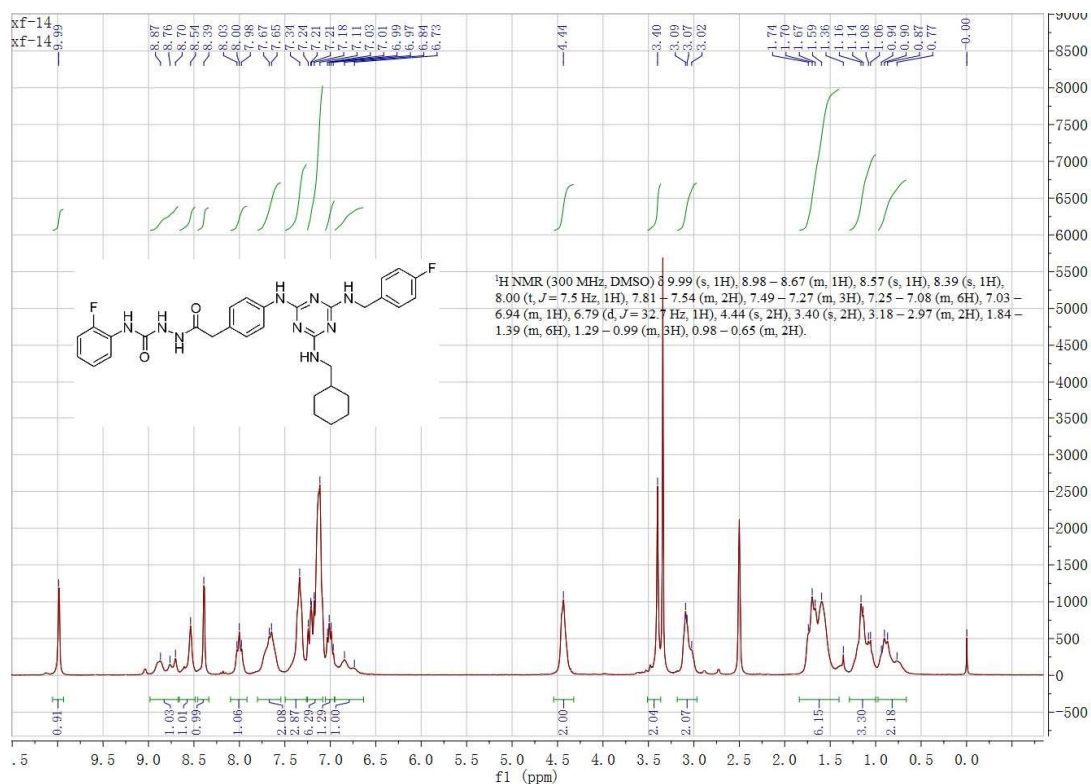

**<sup>1</sup>H-NMR of 9d**

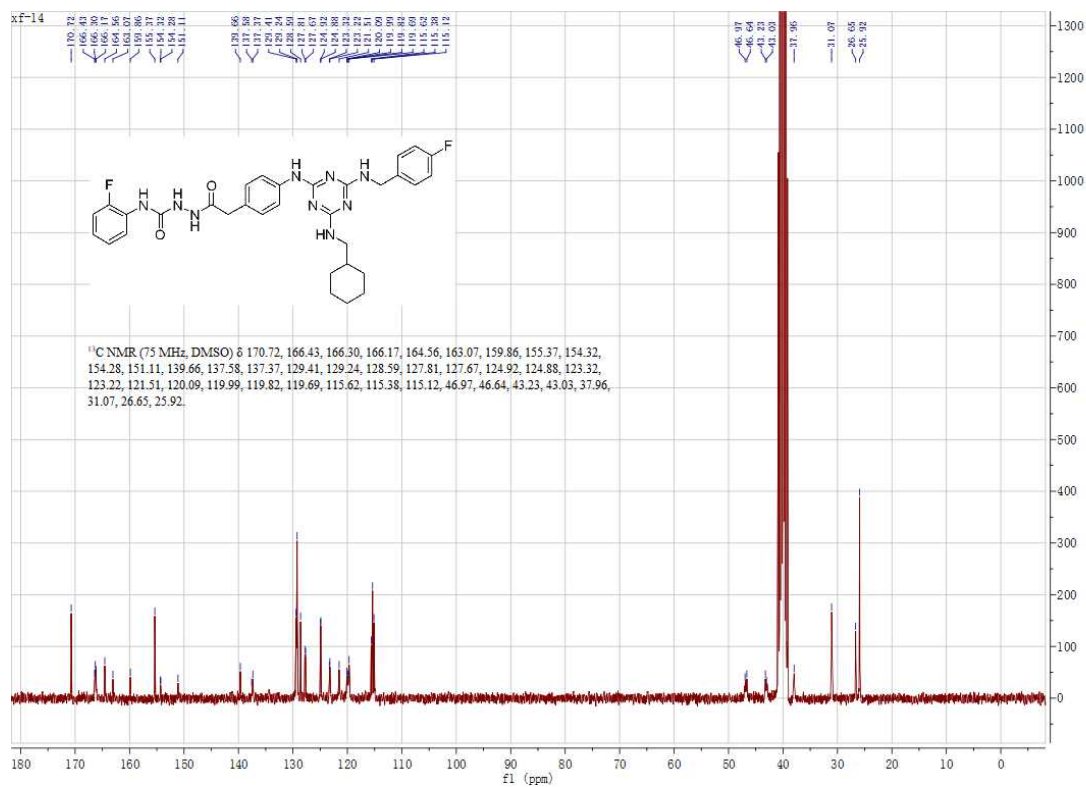

**<sup>13</sup>C-NMR of 9d**

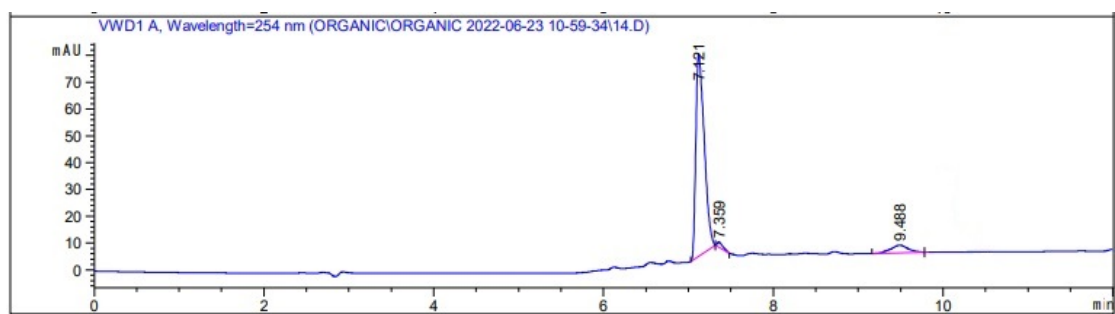

HPLC purity of 9d

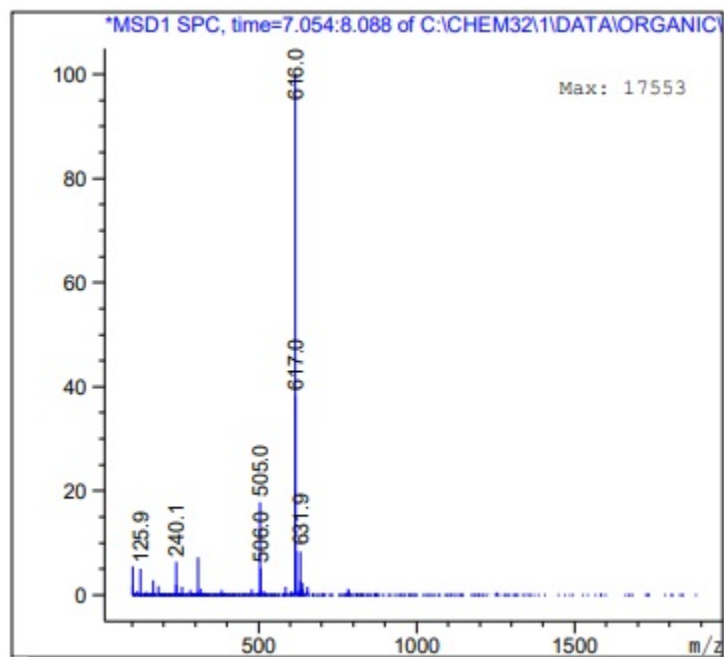

ESI-MS of 9d

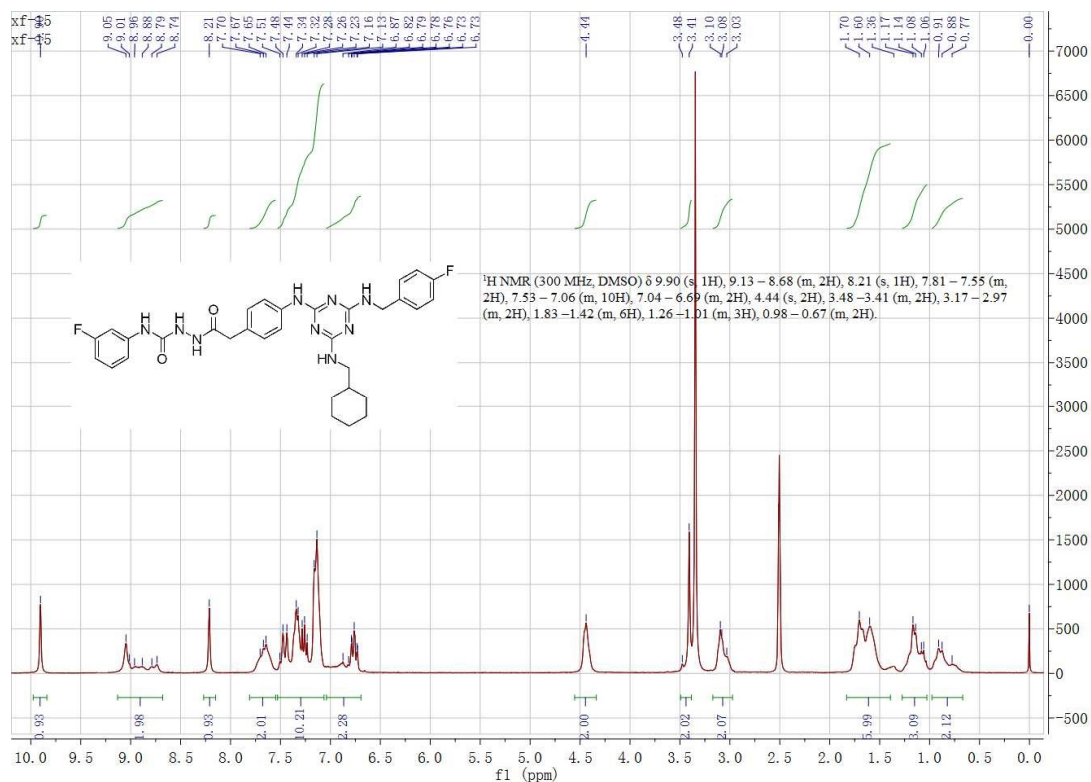

**<sup>1</sup>H-NMR of 9e**

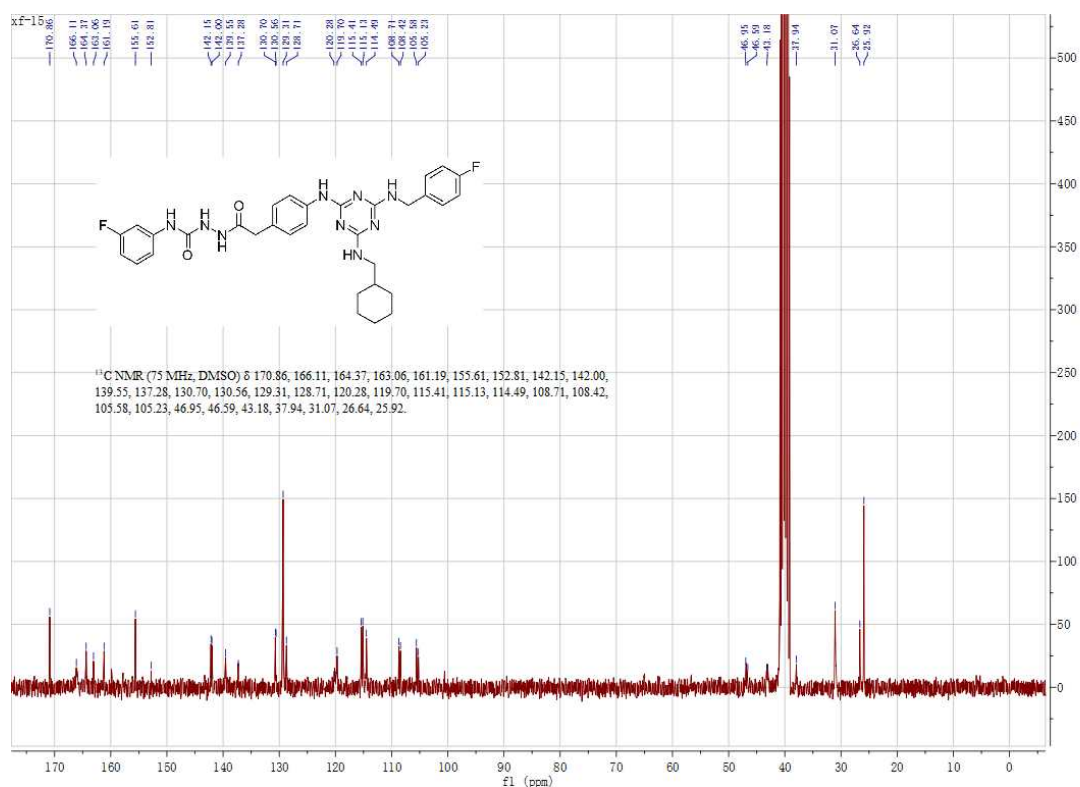

**<sup>13</sup>C-NMR of 9e**

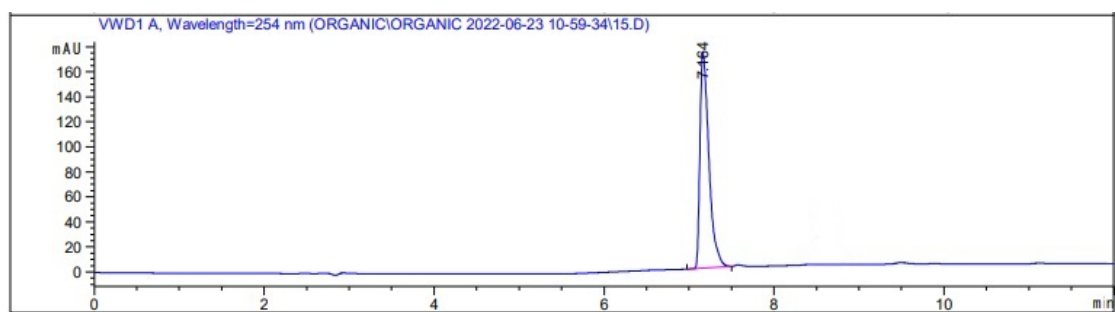

**HPLC purity of 9e**

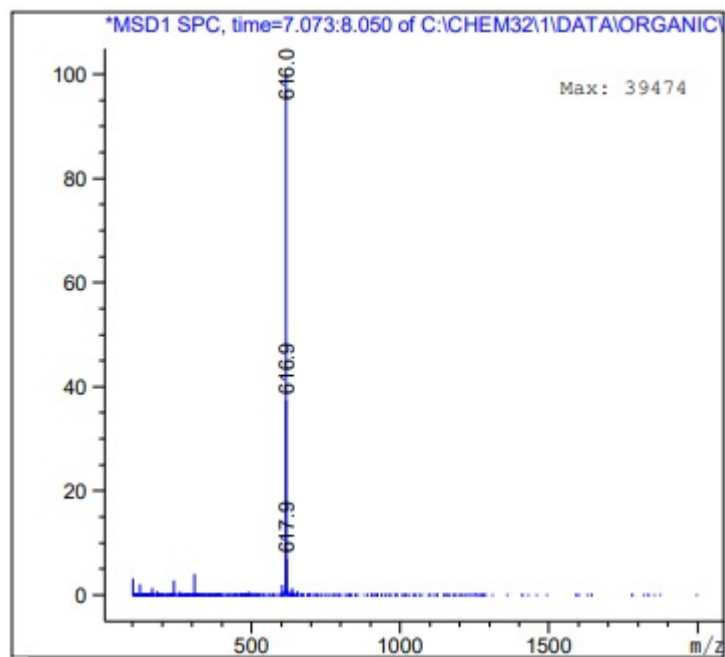

**ESI-MS of 9e**

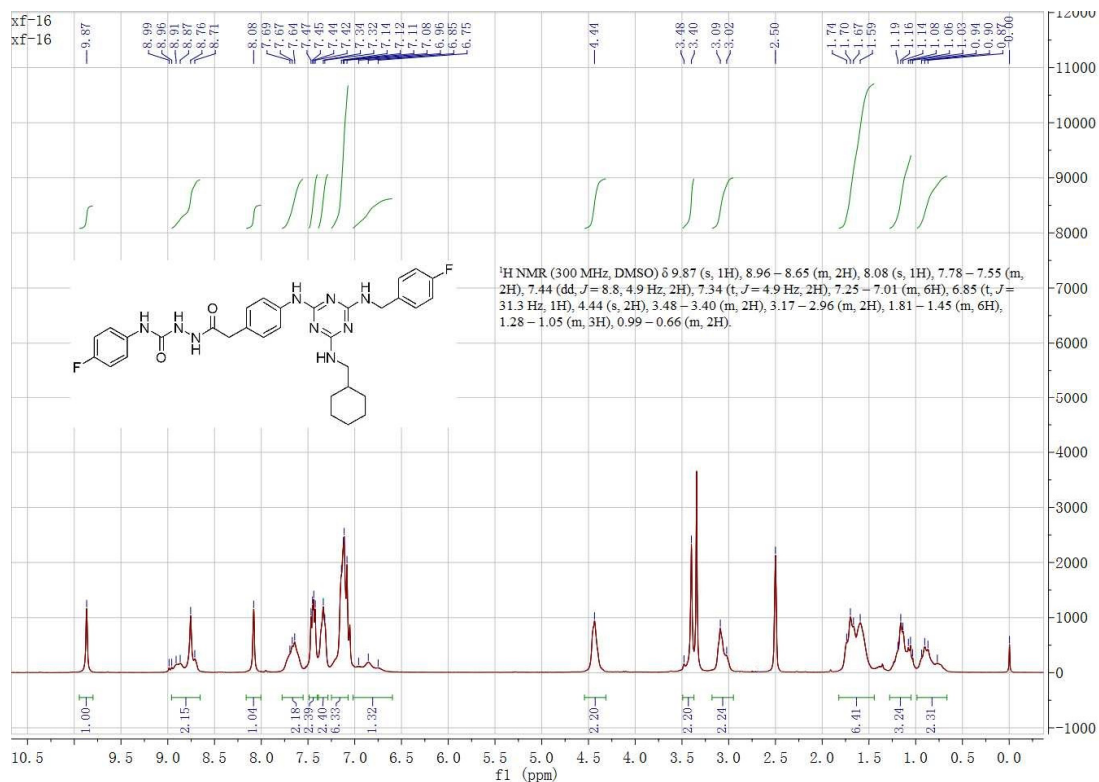

$^1\text{H}$ -NMR of 9f

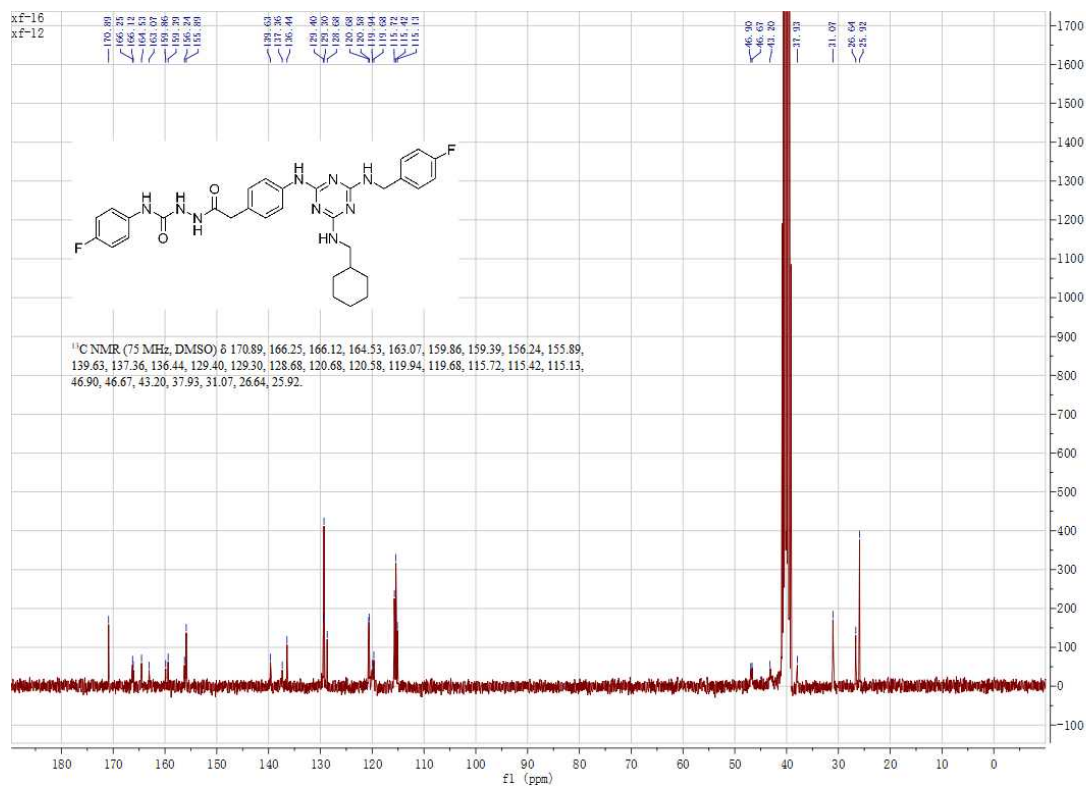

$^{13}\text{C}$ -NMR of 9f

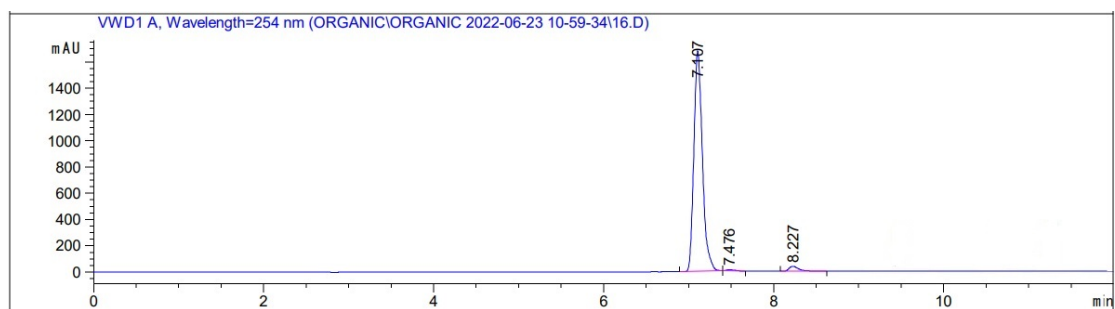

HPLC purity of 9f

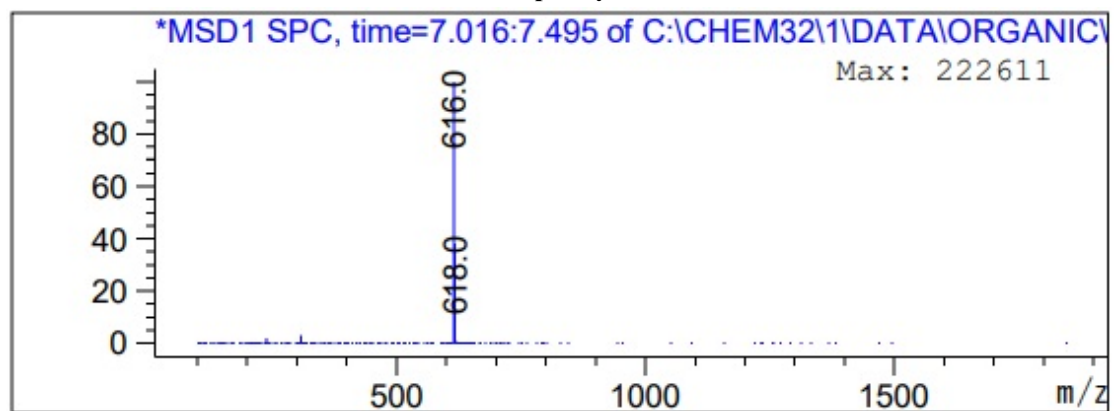

ESI-MS of 9f

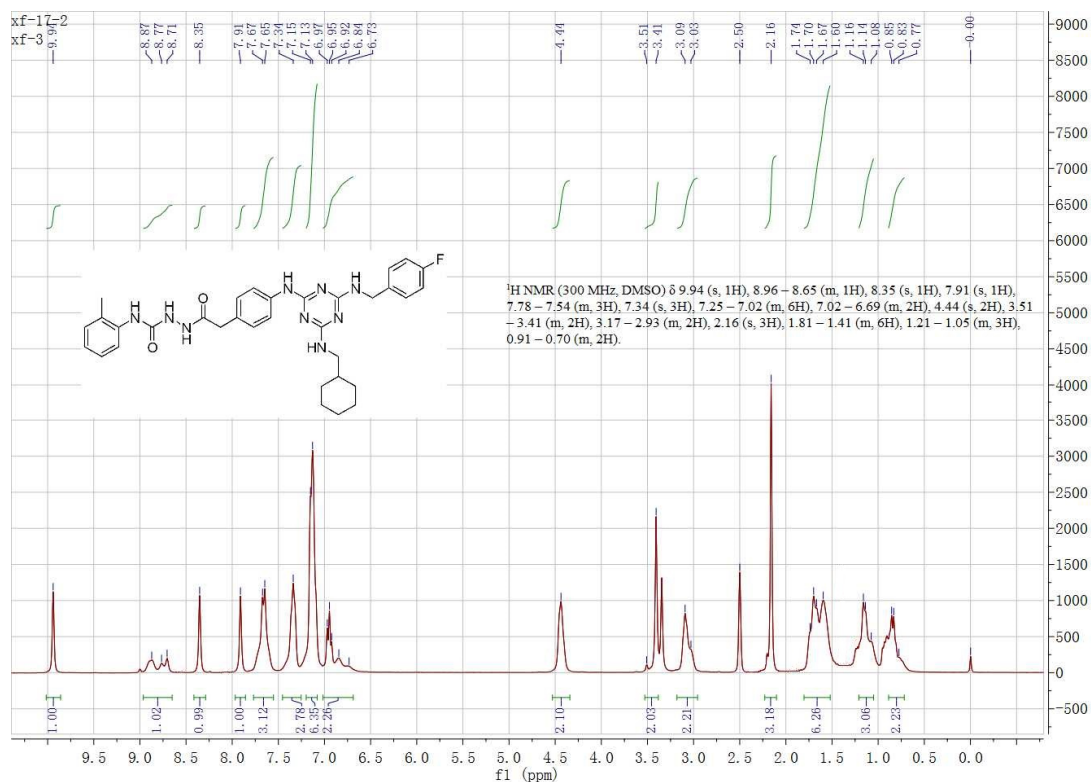

$^1\text{H-NMR}$  of 9g

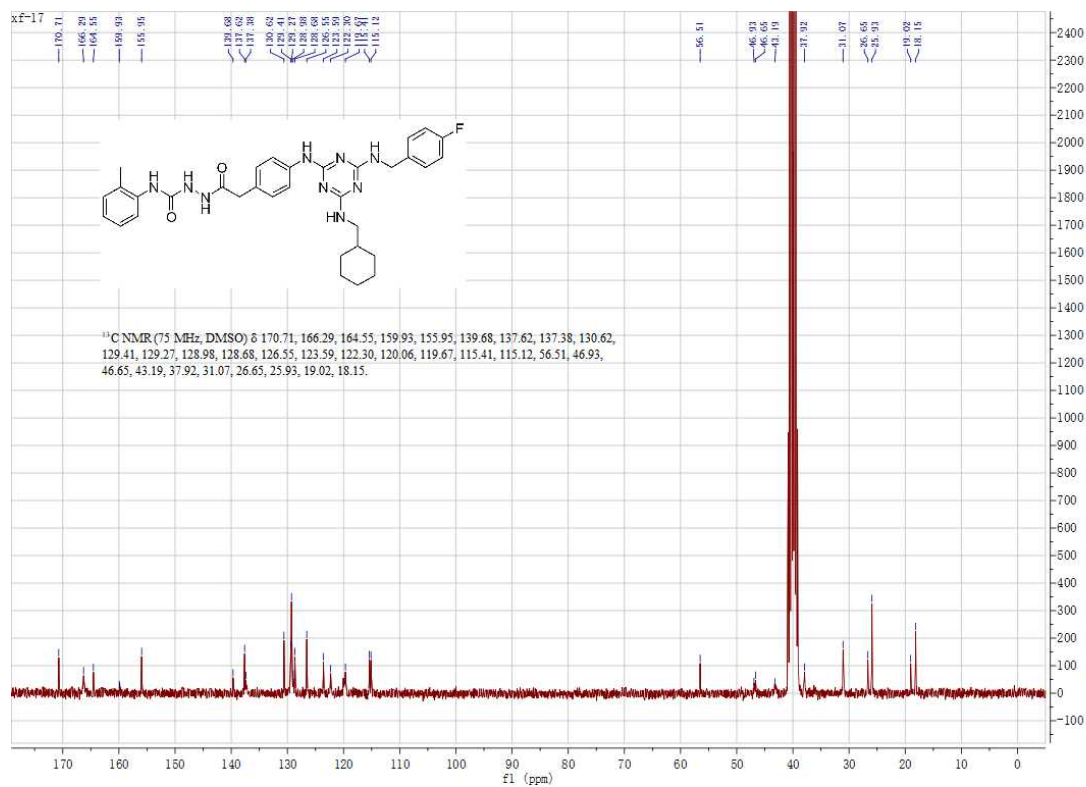

$^{13}\text{C-NMR}$  of 9g

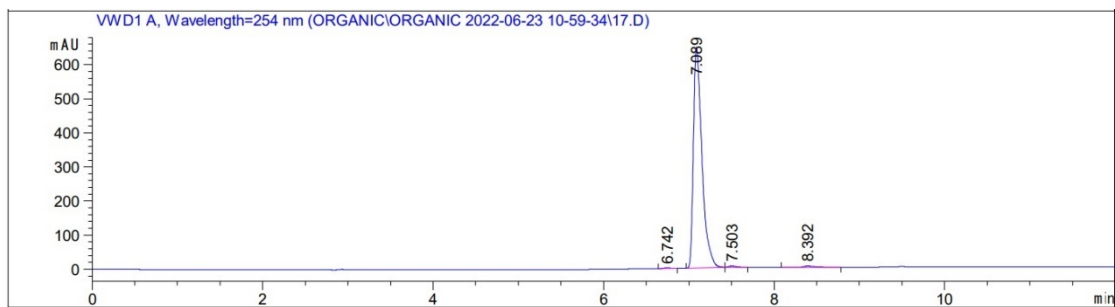

HPLC purity of 9g

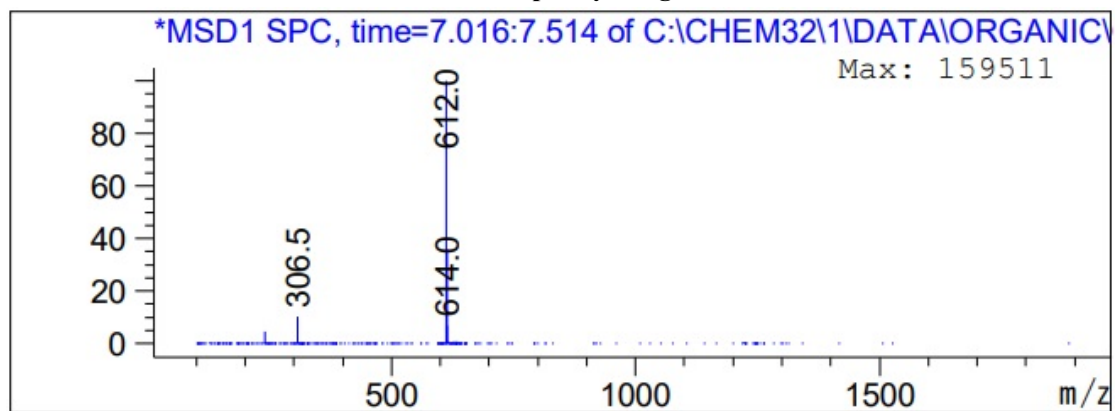

ESI-MS of 9g



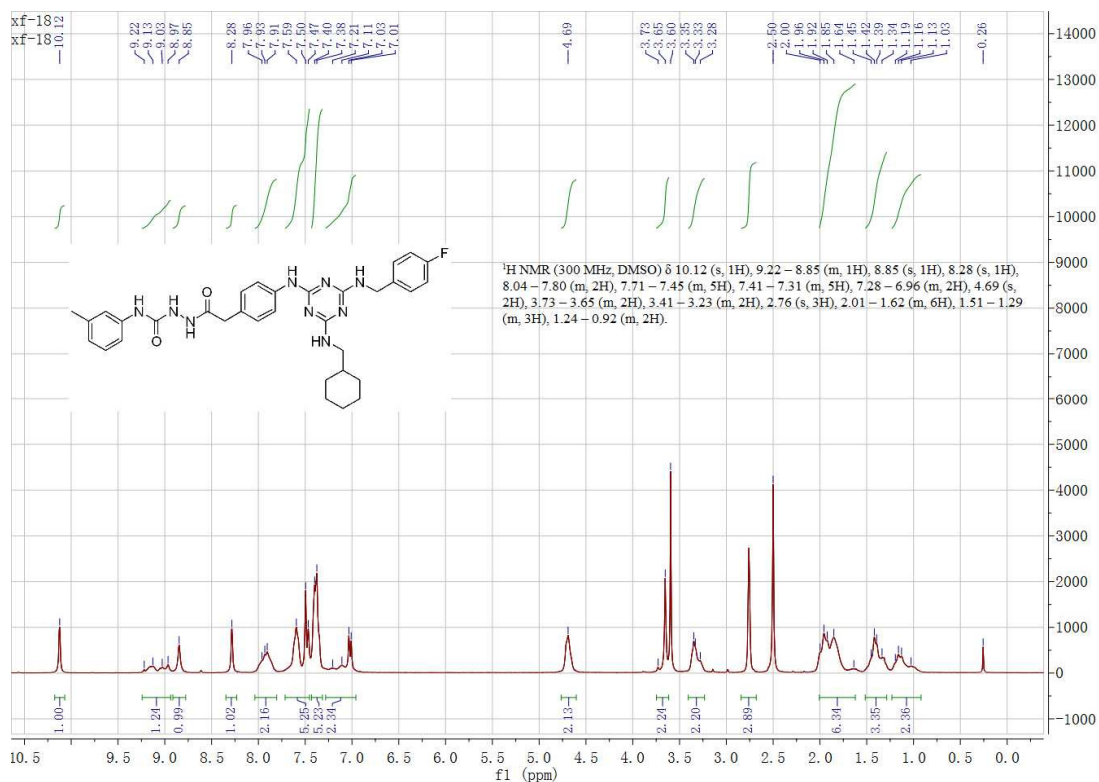

$^1\text{H}$ -NMR of 9h

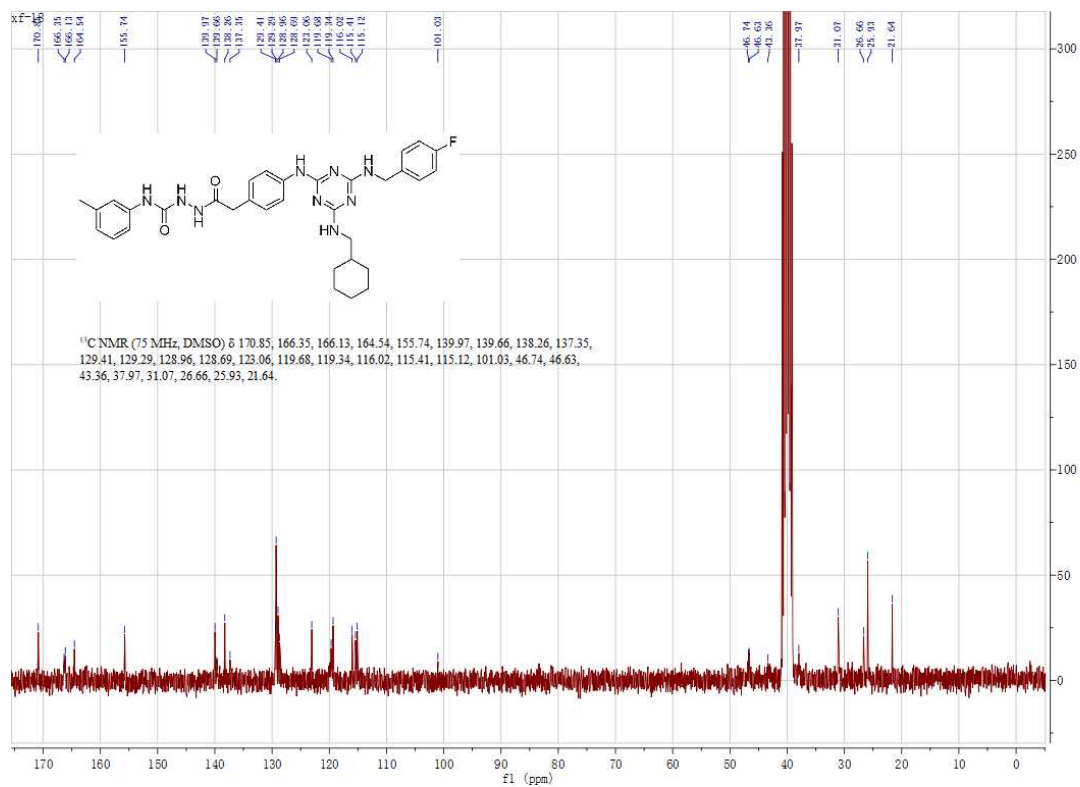

$^{13}\text{C}$ -NMR of 9h

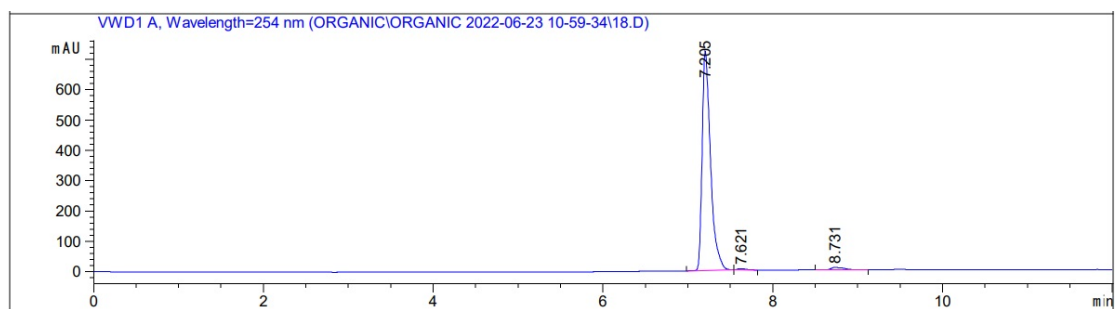

HPLC purity of 9h

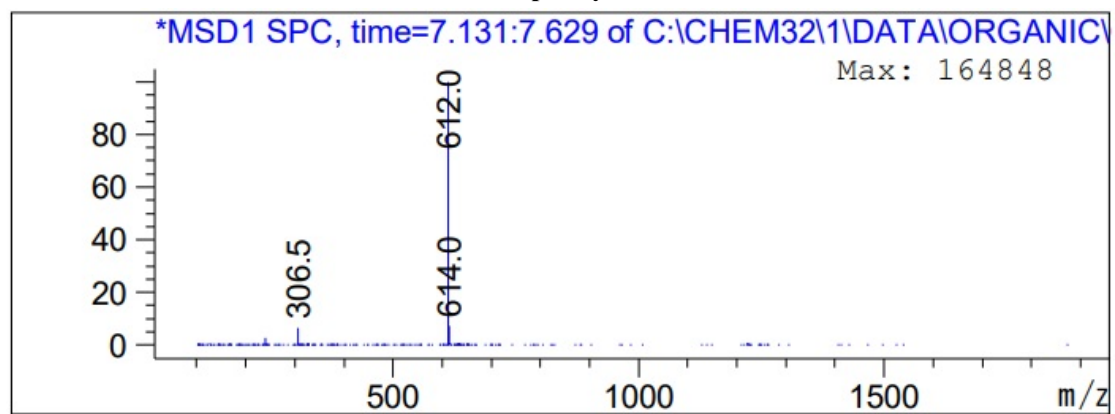

ESI-MS of 9h

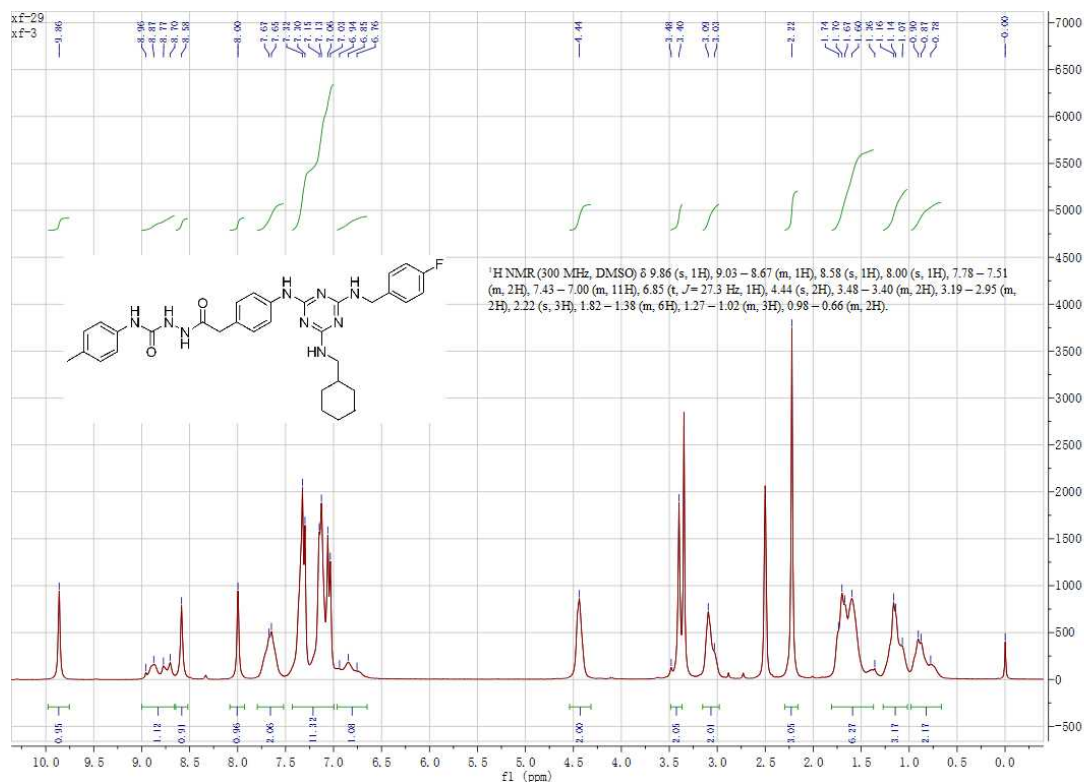

<sup>1</sup>H-NMR of 9i

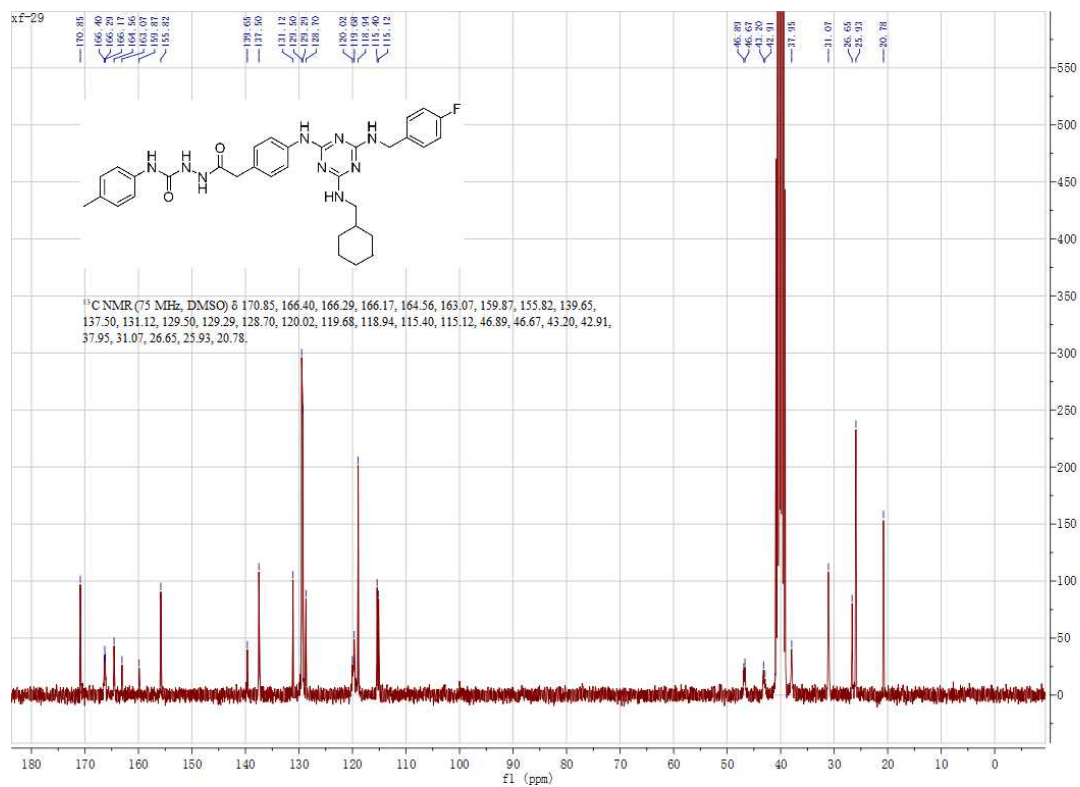

<sup>13</sup>C-NMR of 9i

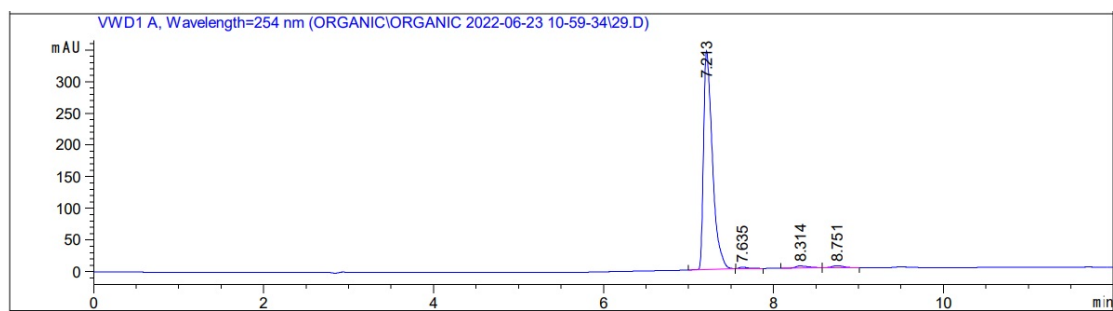

HPLC purity of 9i

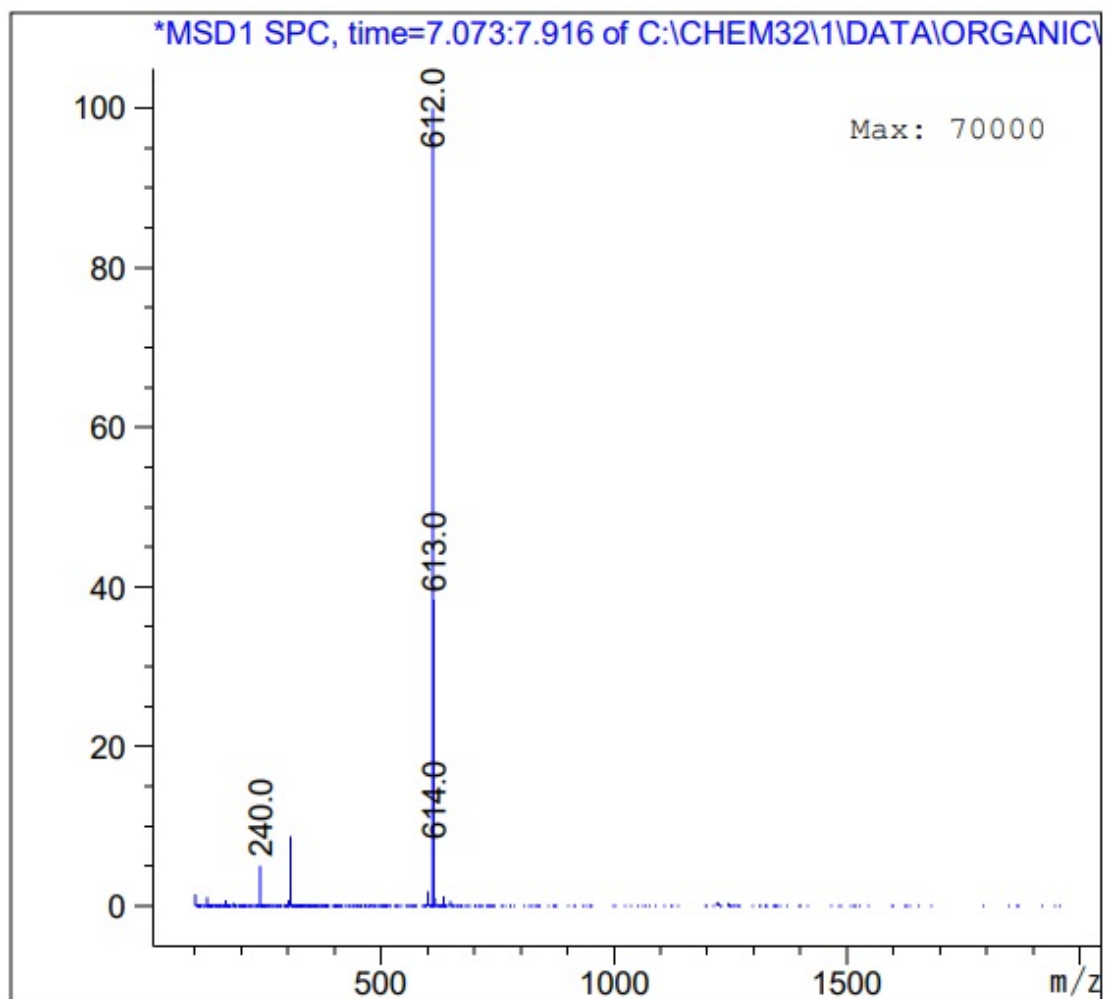

ESI-MS of 9i

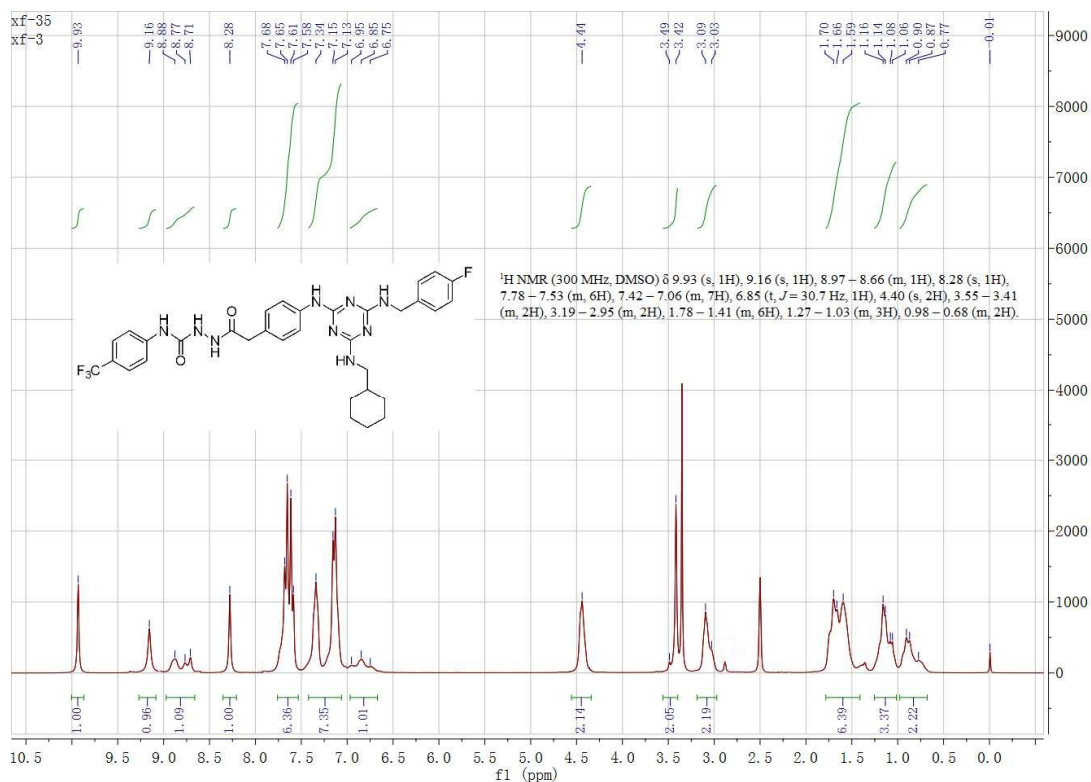

**<sup>1</sup>H-NMR of 9j**

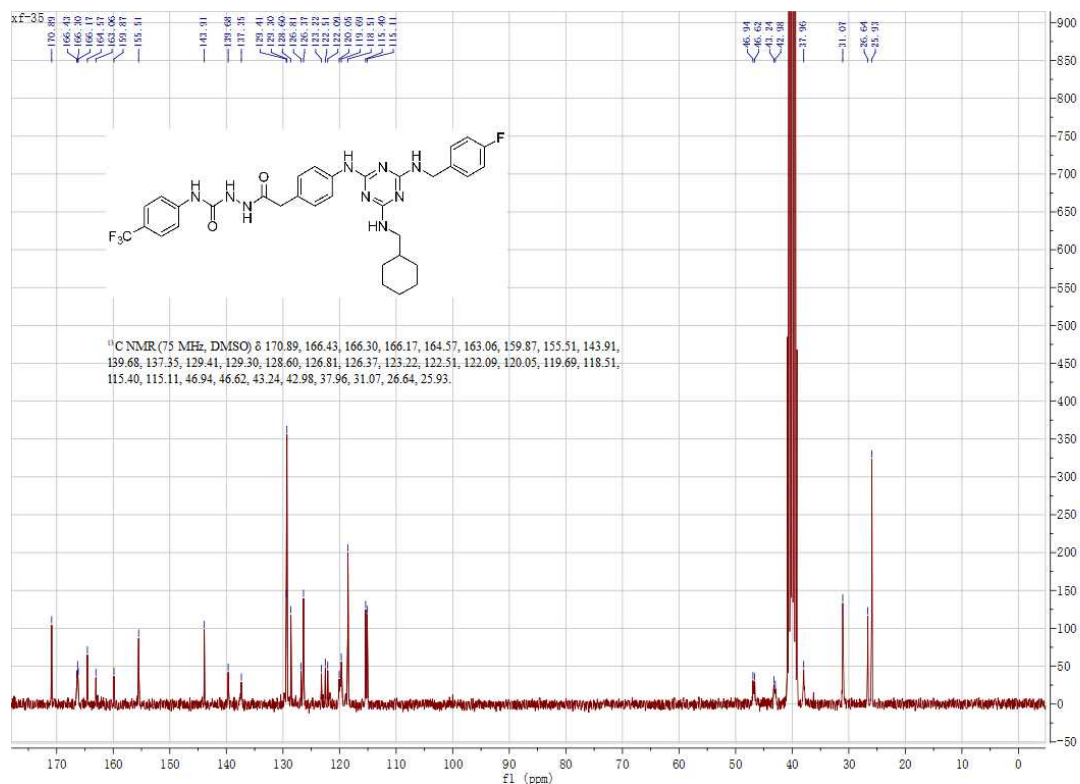

**<sup>13</sup>C-NMR of 9j**

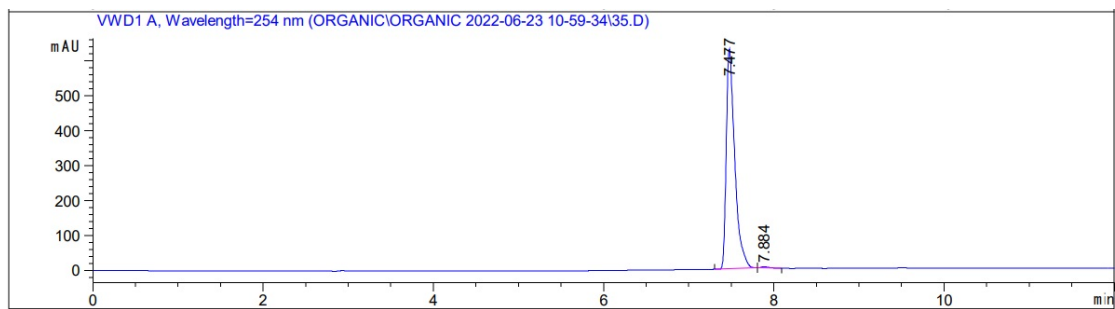

HPLC purity of 9j

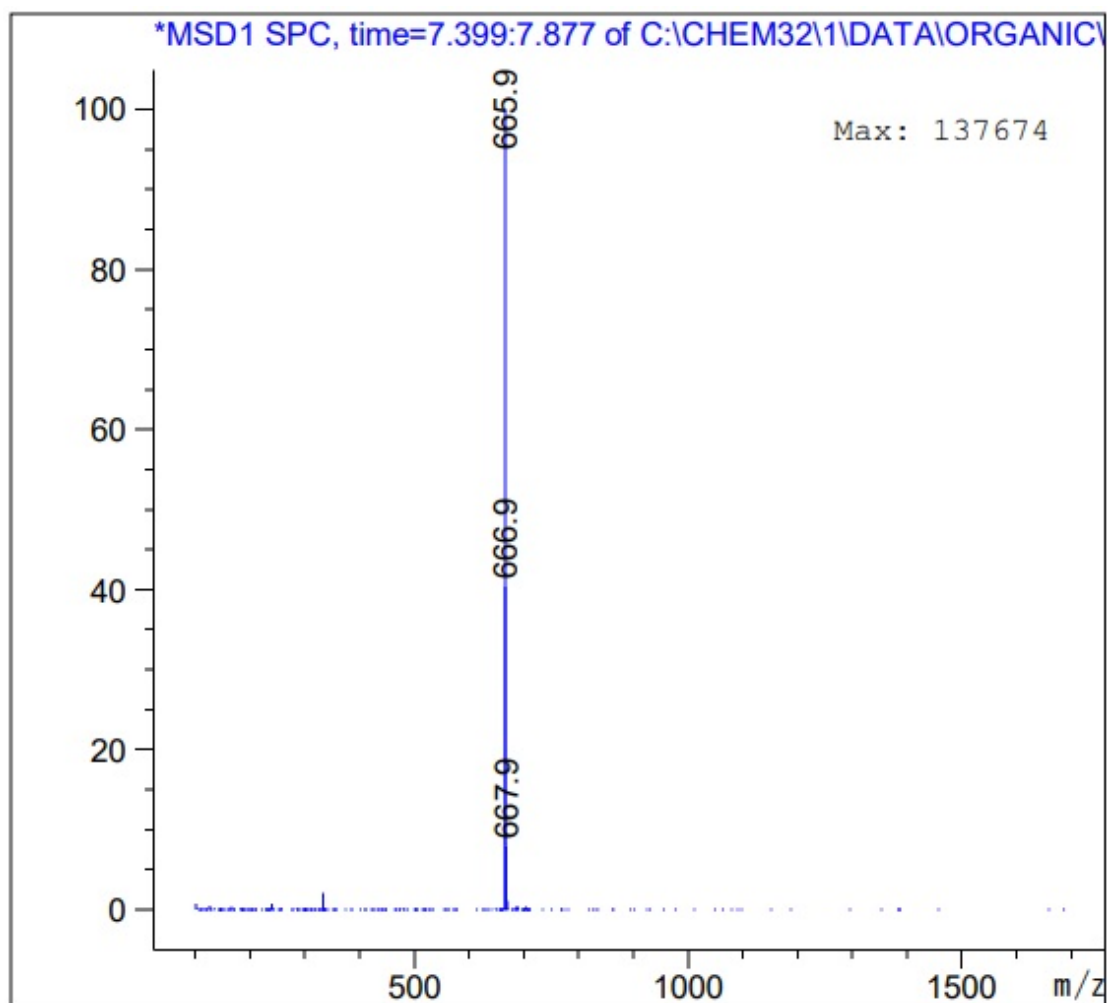

ESI-MS of 9j

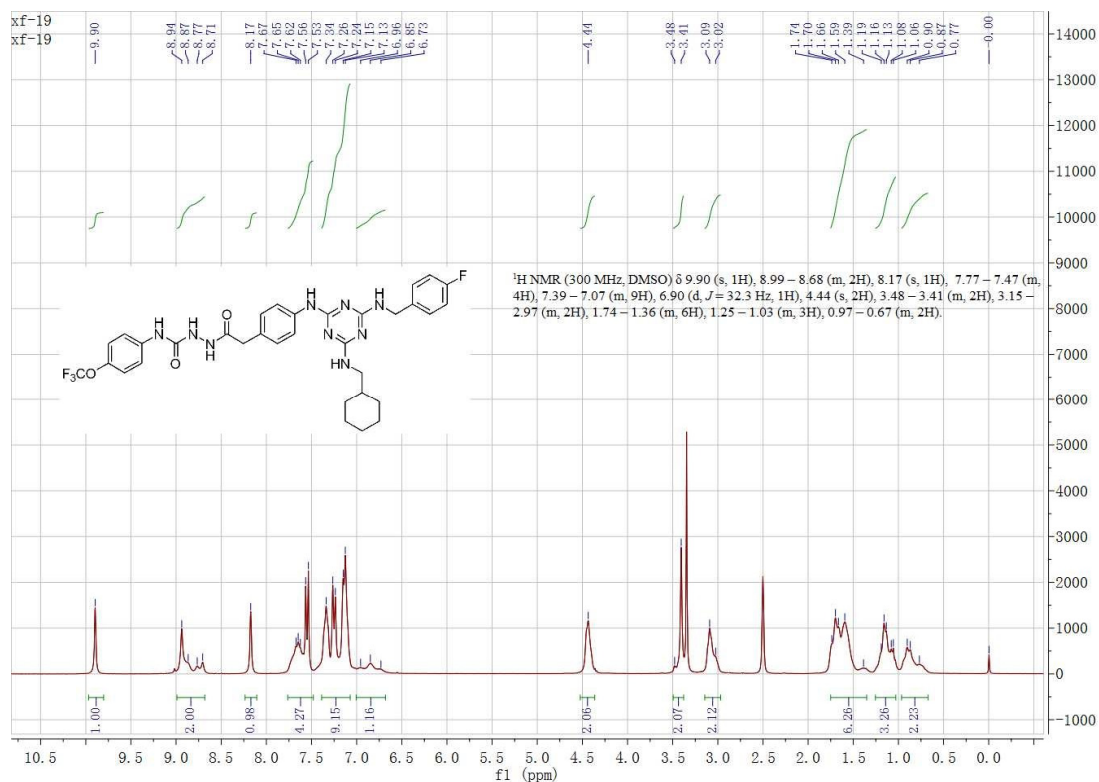

$^1\text{H-NMR}$  of 9k

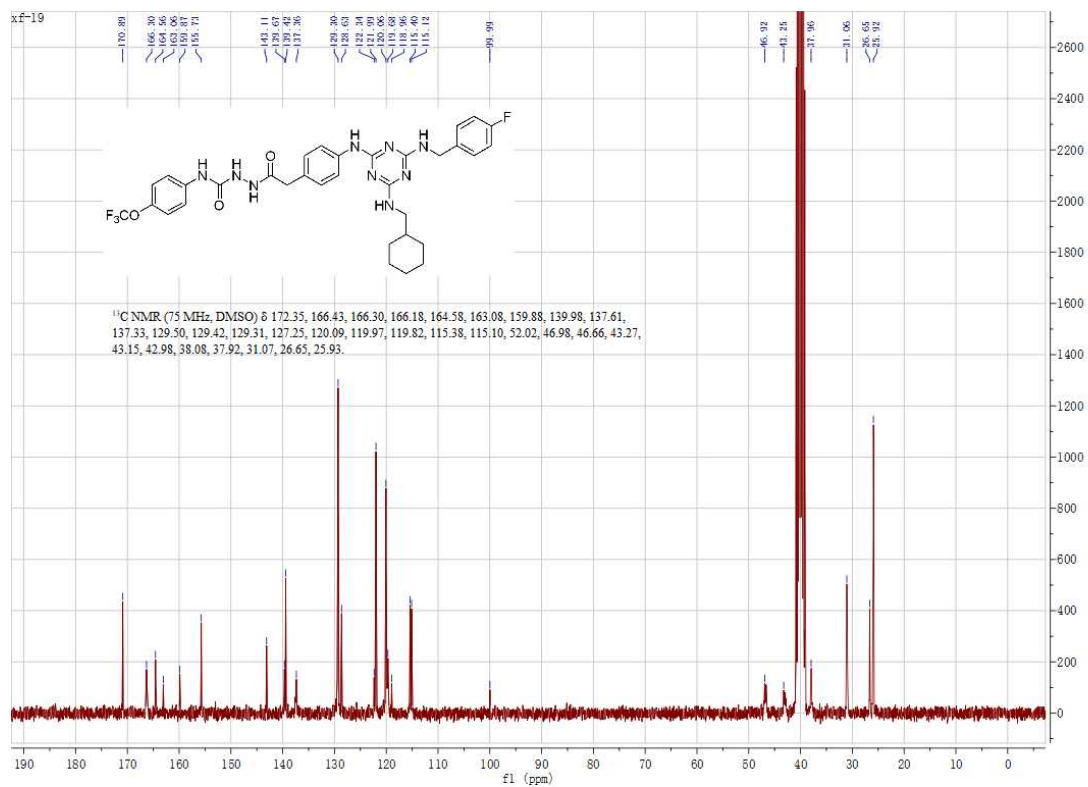

$^{13}\text{C-NMR}$  of 9k

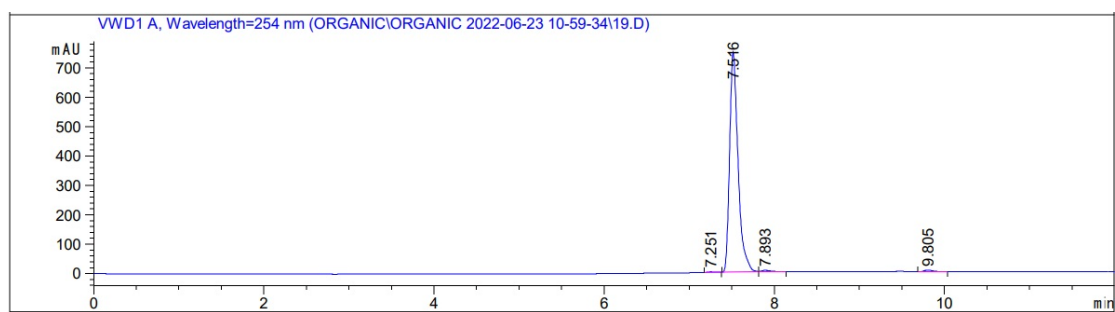

HPLC purity of 9k

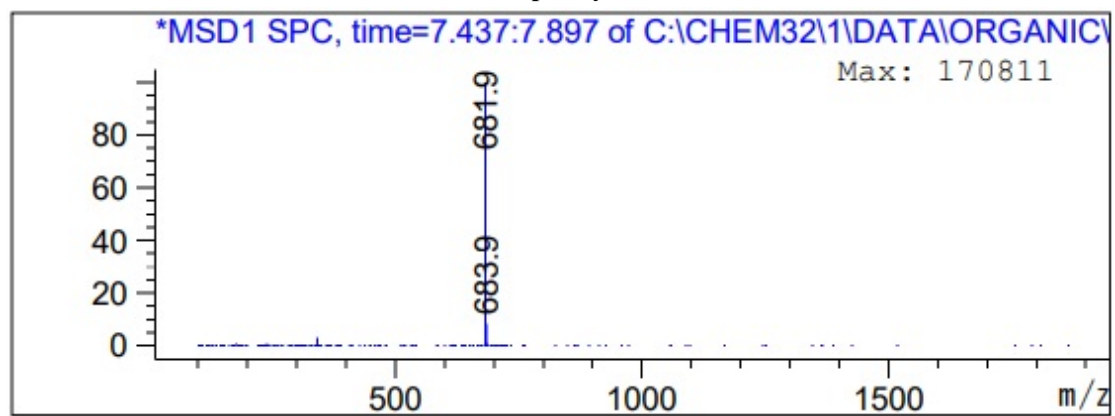

ESI-MS of 9k



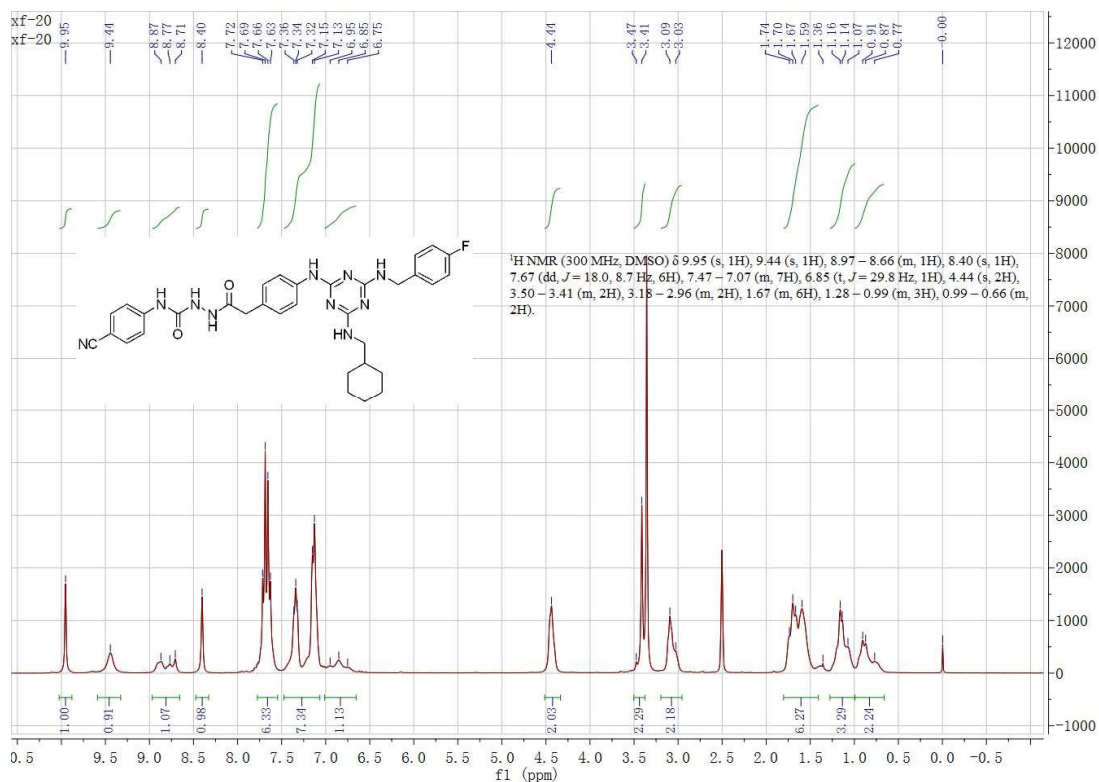

$^1\text{H-NMR}$  of 91

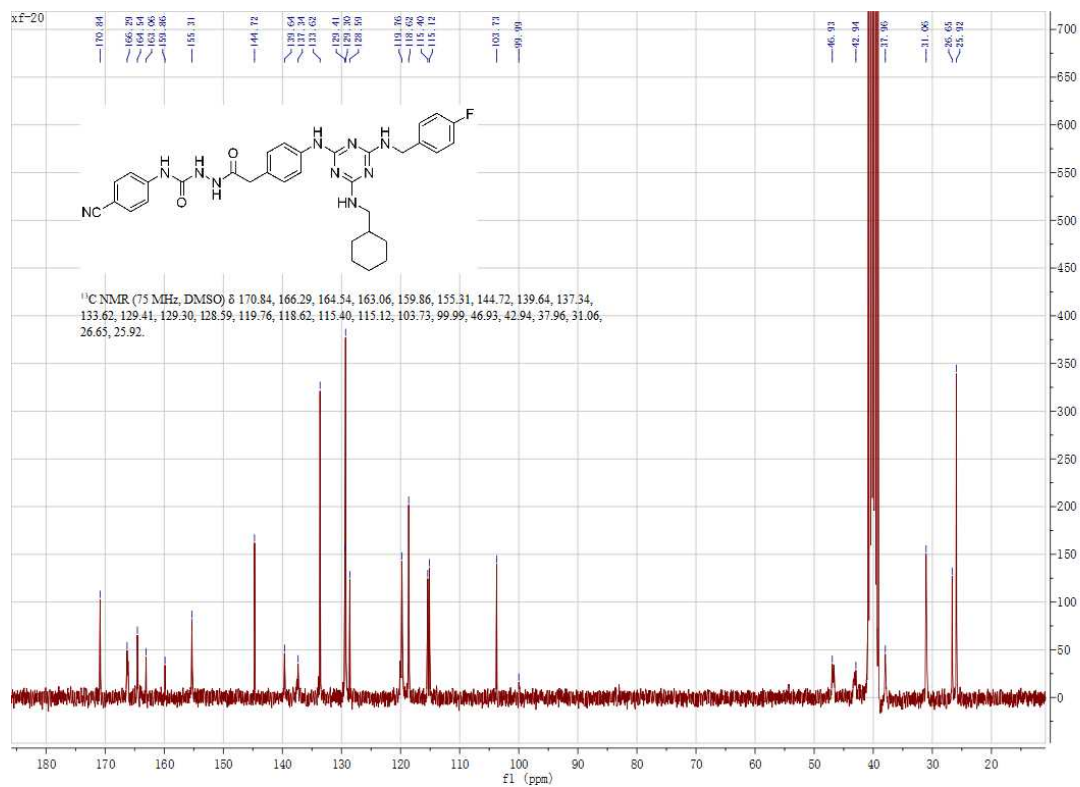

$^{13}\text{C-NMR}$  of 91

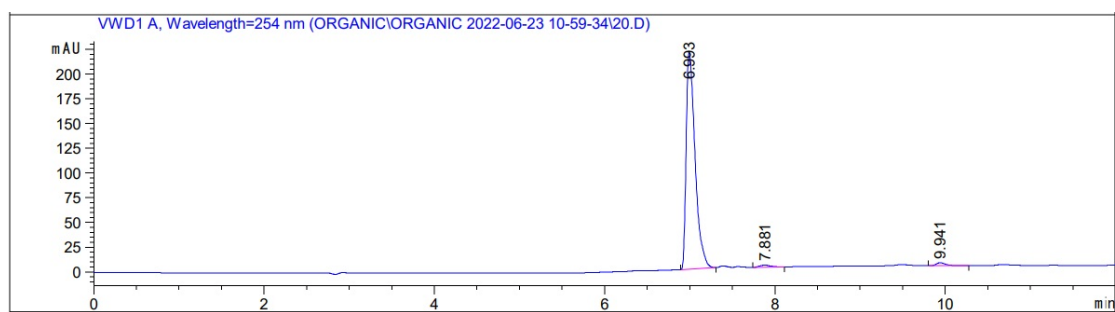

HPLC purity of 9I

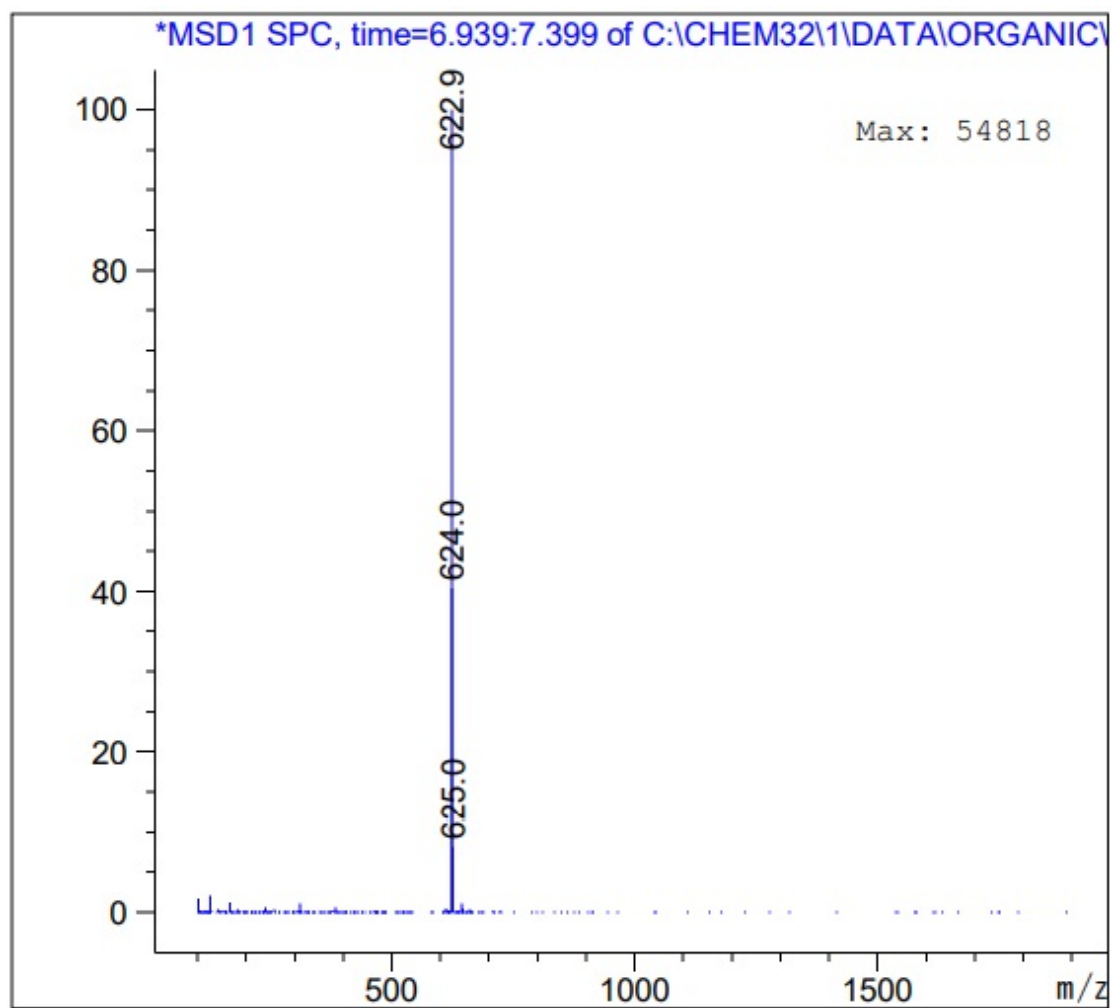

ESI-MS of 9I

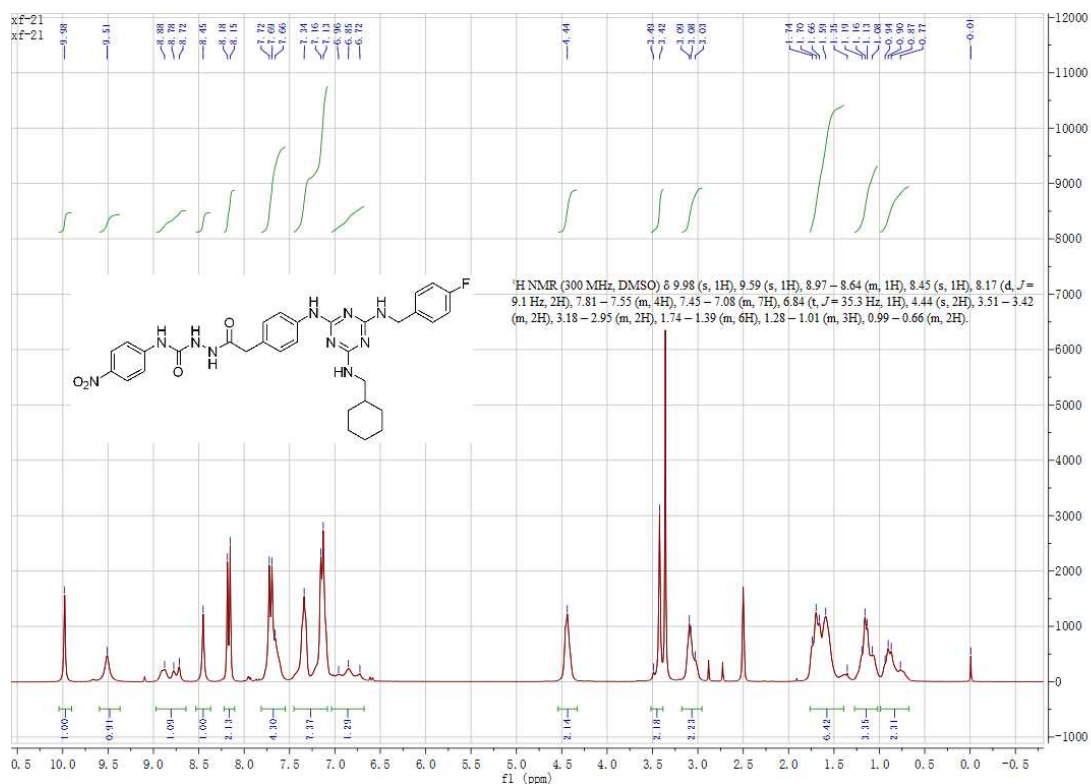

<sup>1</sup>H-NMR of 9m

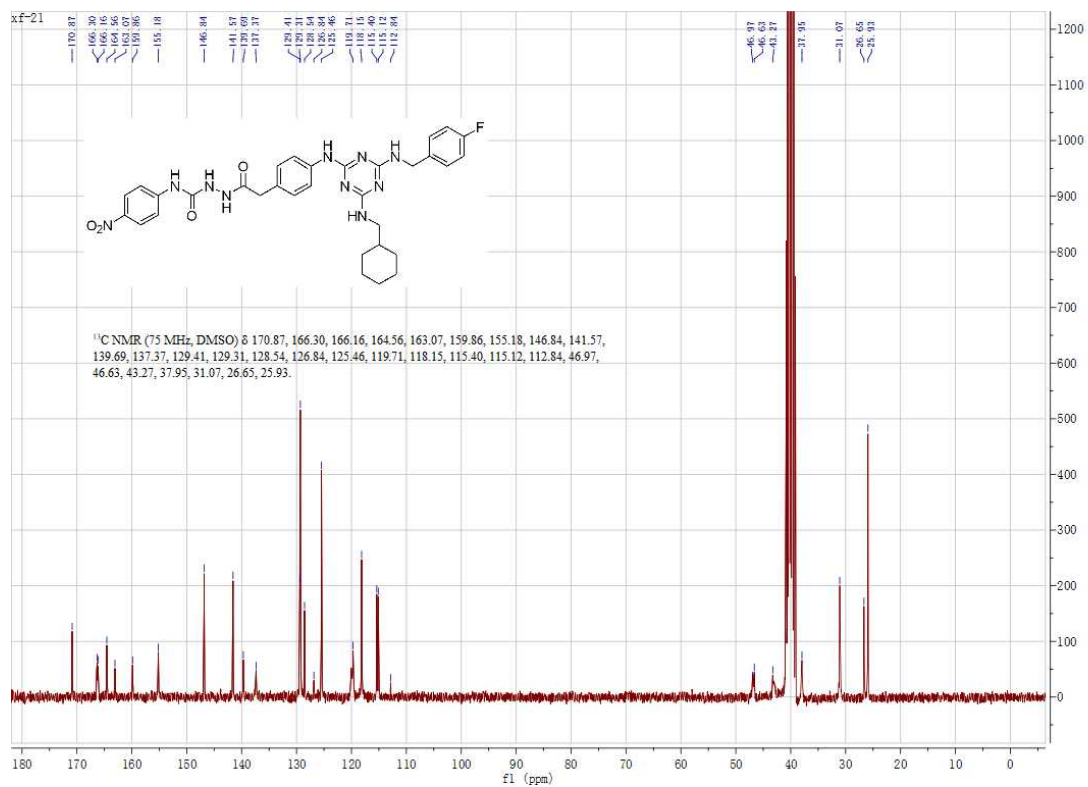

<sup>13</sup>C-NMR of 9m

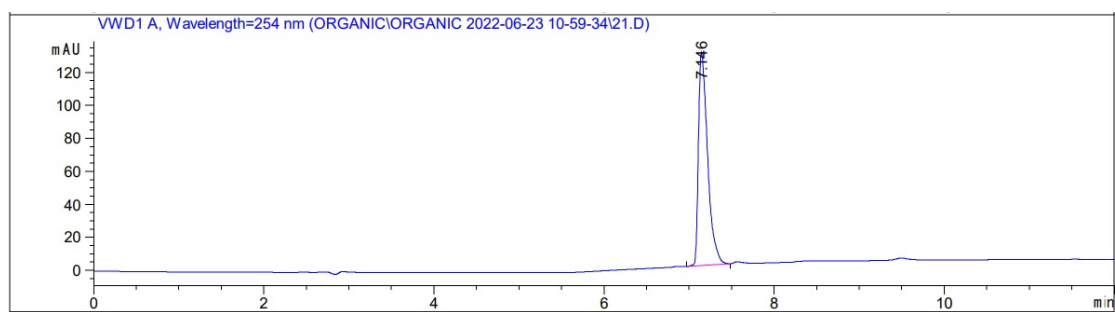

HPLC purity of 9m

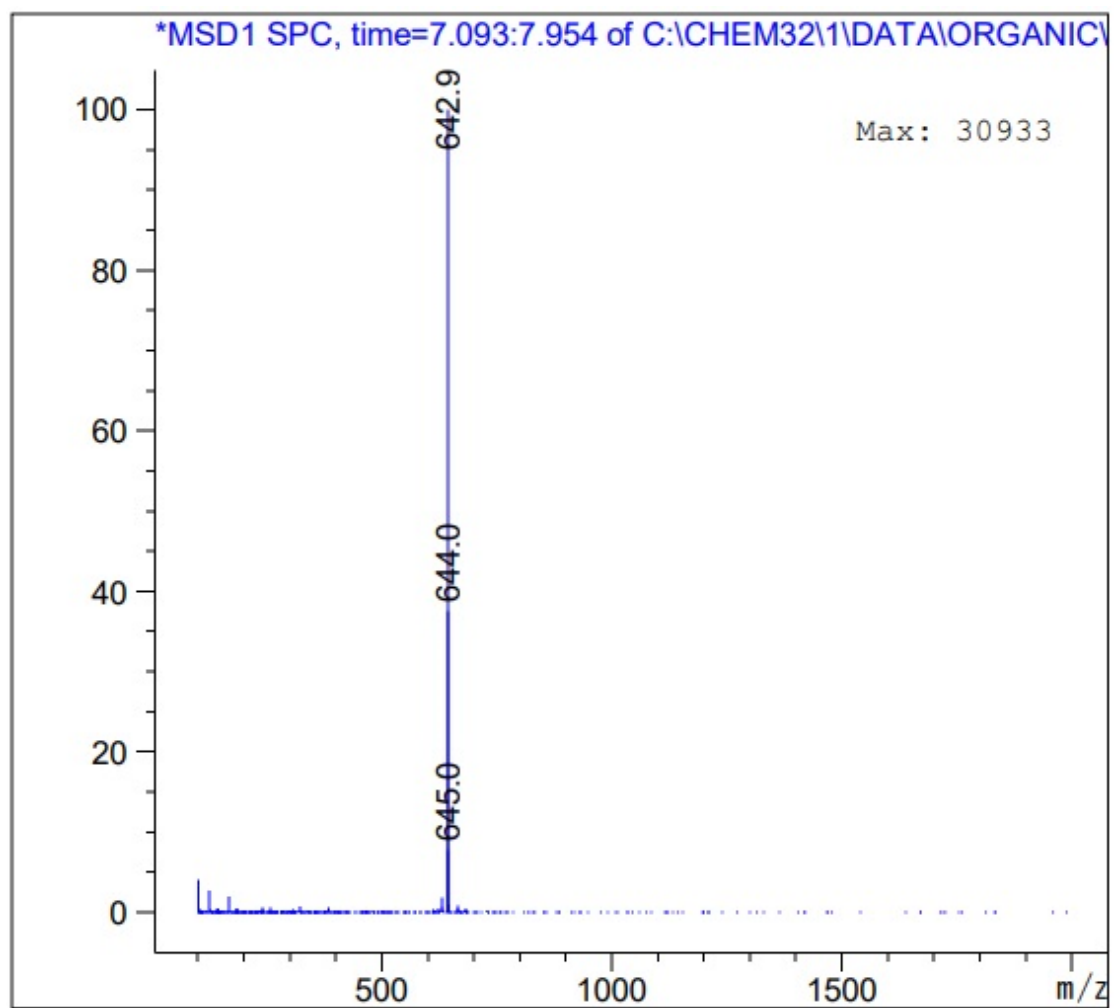

ESI-MS of 9m

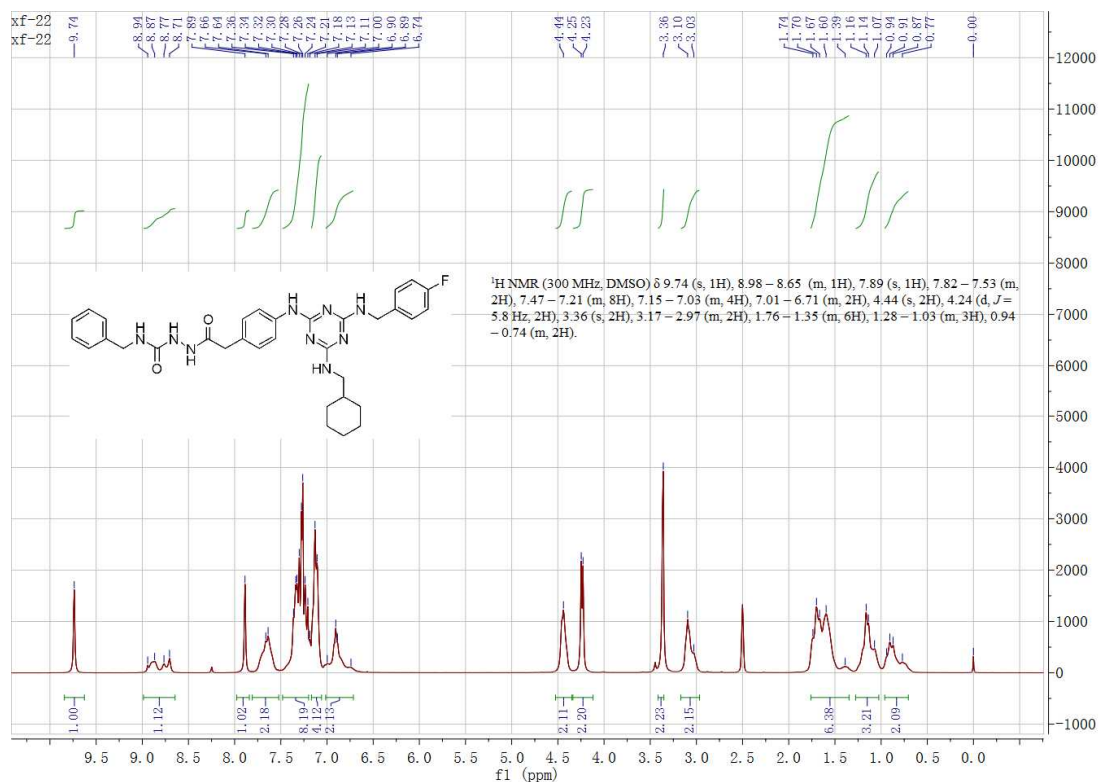

$^1\text{H}$ -NMR of 9n

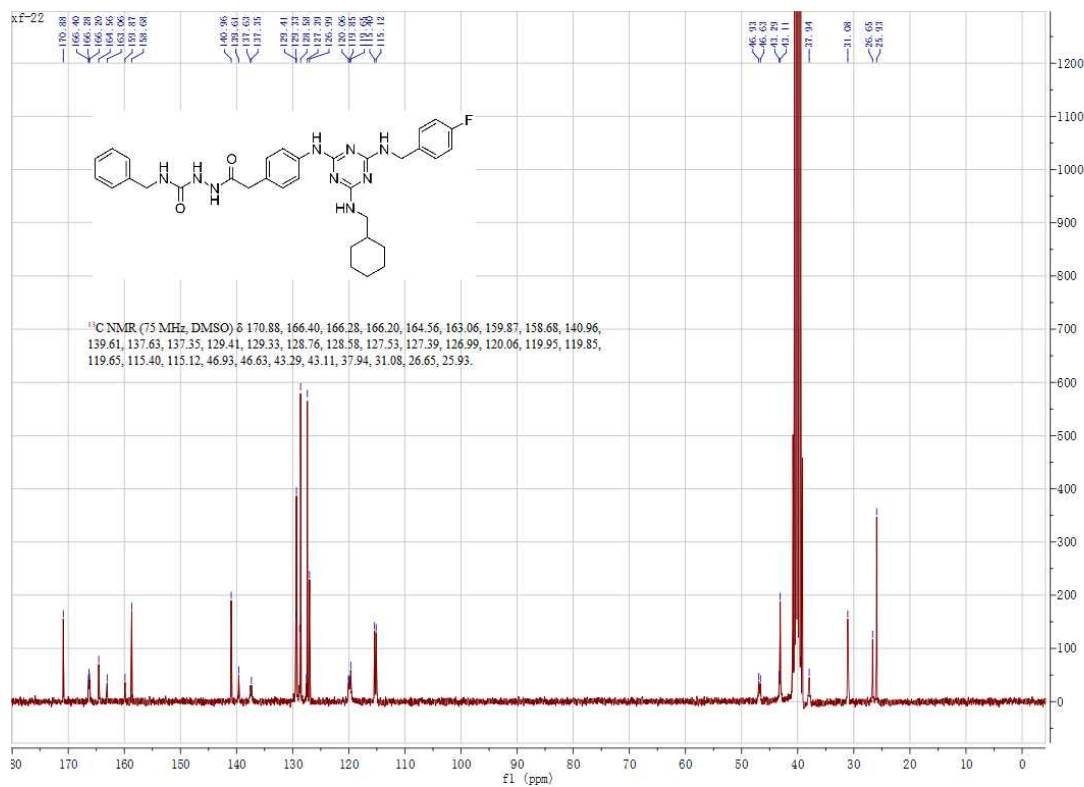

$^{13}\text{C}$ -NMR of 9n

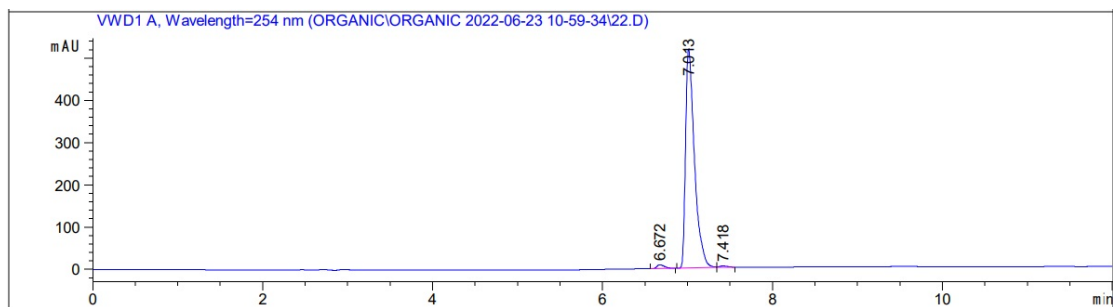

HPLC purity of 9n

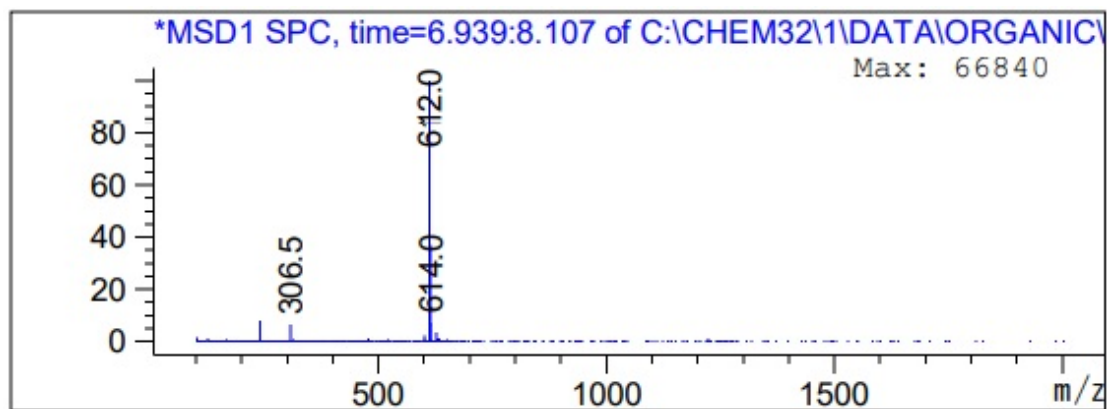

ESI-MS of 9n

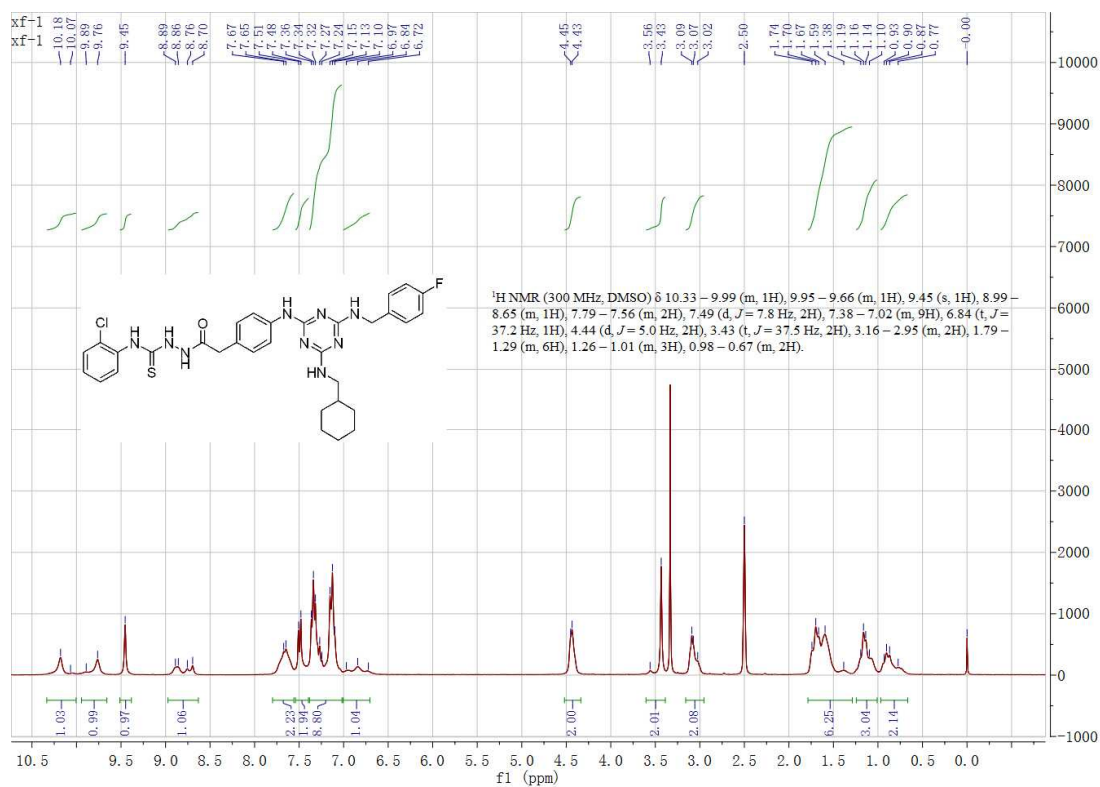

**<sup>1</sup>H-NMR of 10a**

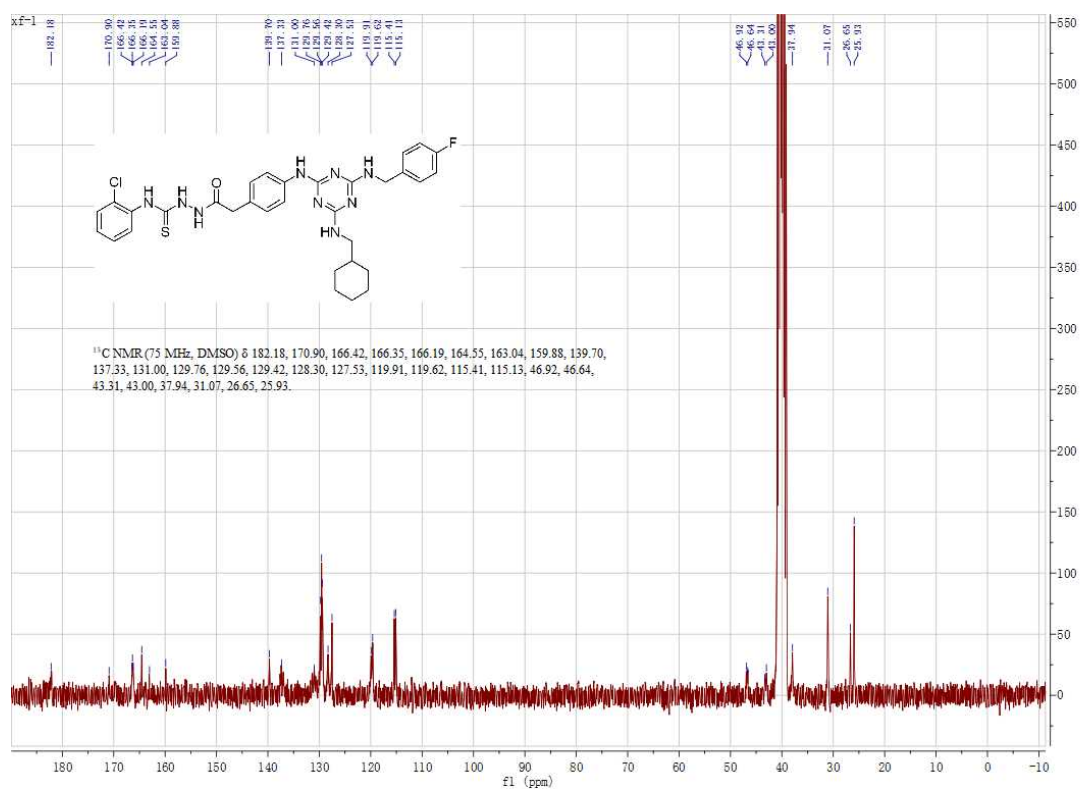

**<sup>13</sup>C-NMR of 10a**

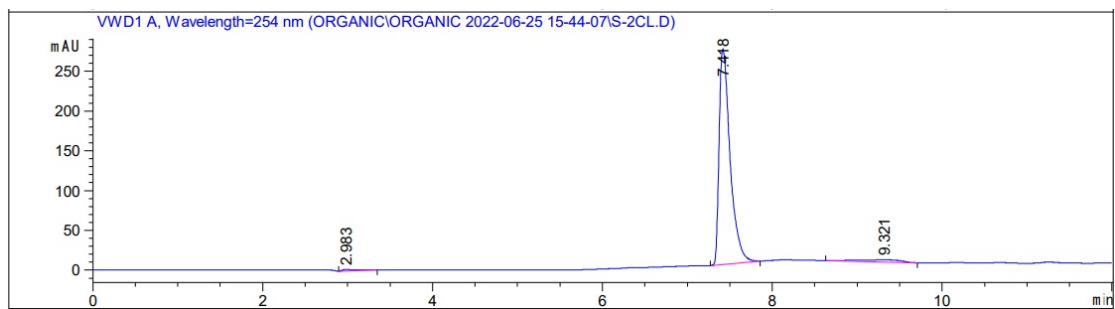

HPLC purity of 10a

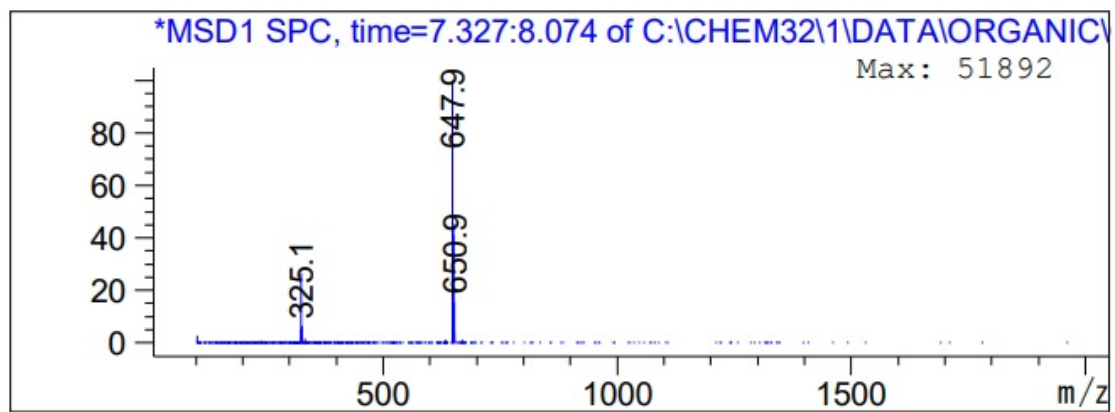

ESI-MS of 10a



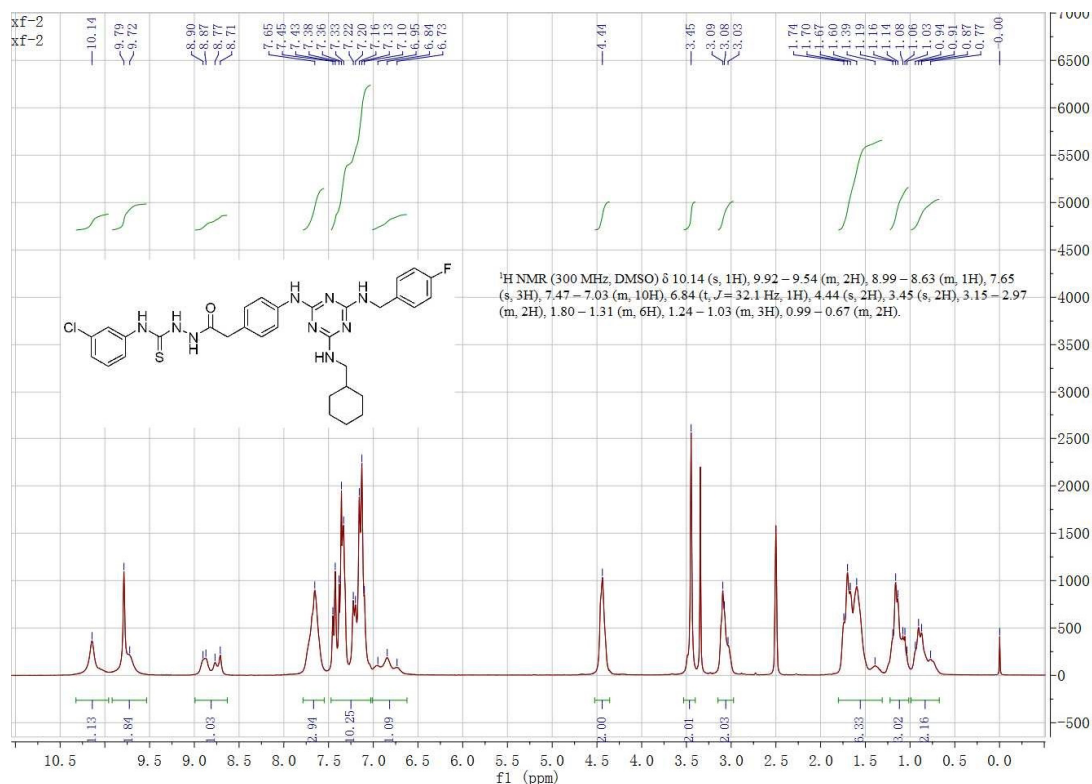

**<sup>1</sup>H-NMR of 10b**

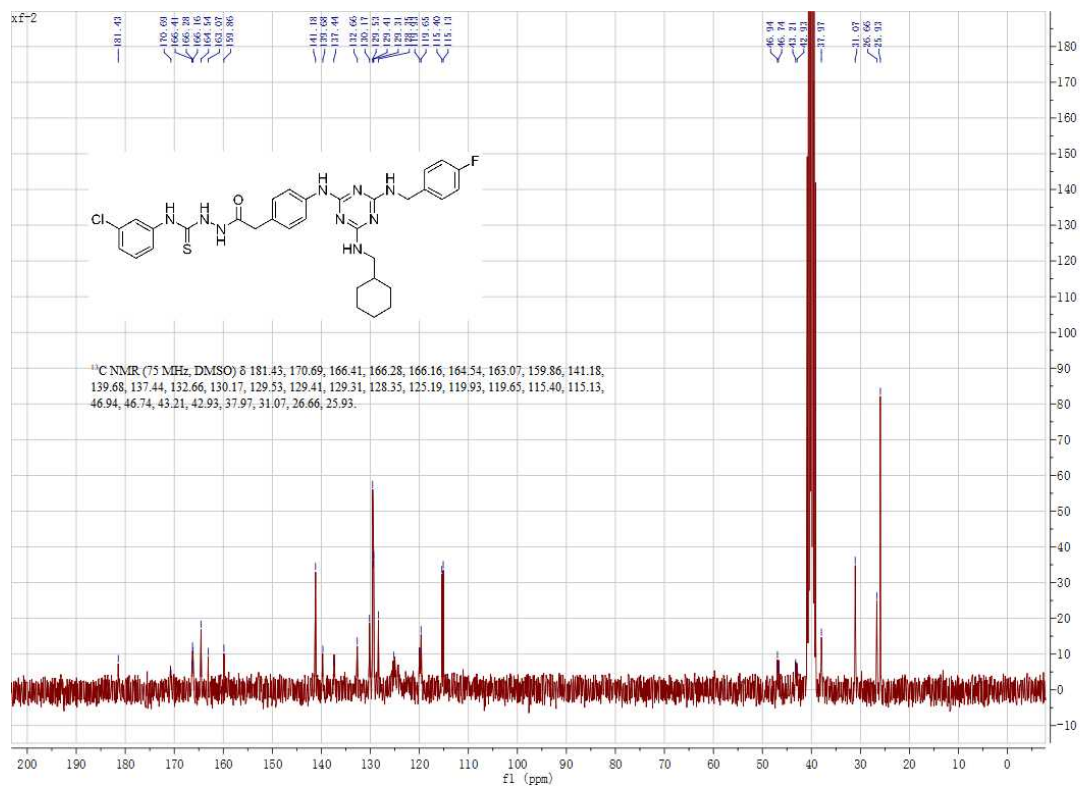

**<sup>13</sup>C-NMR of 10b**

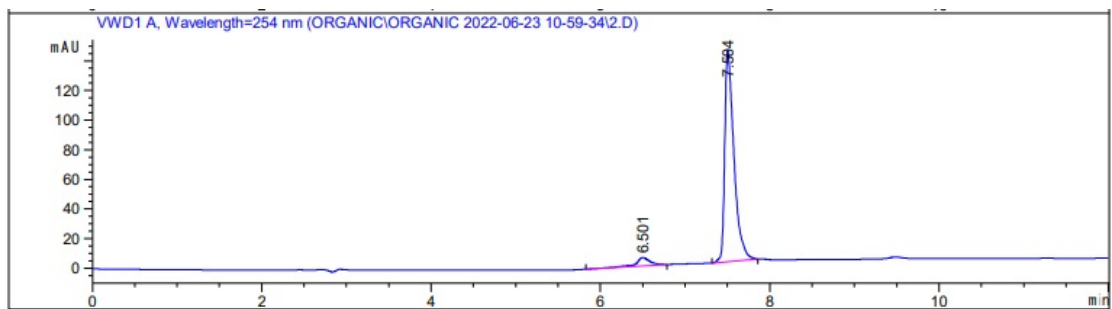

HPLC purity of 10b

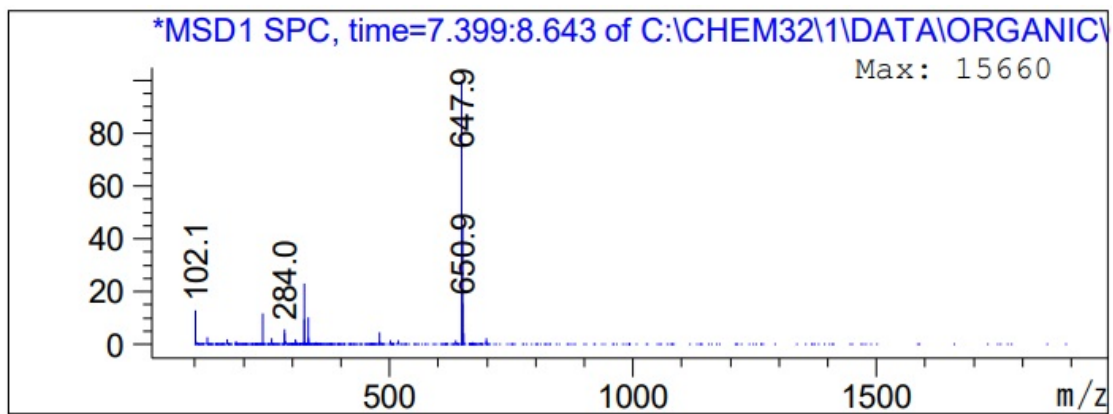

ESI-MS of 10b

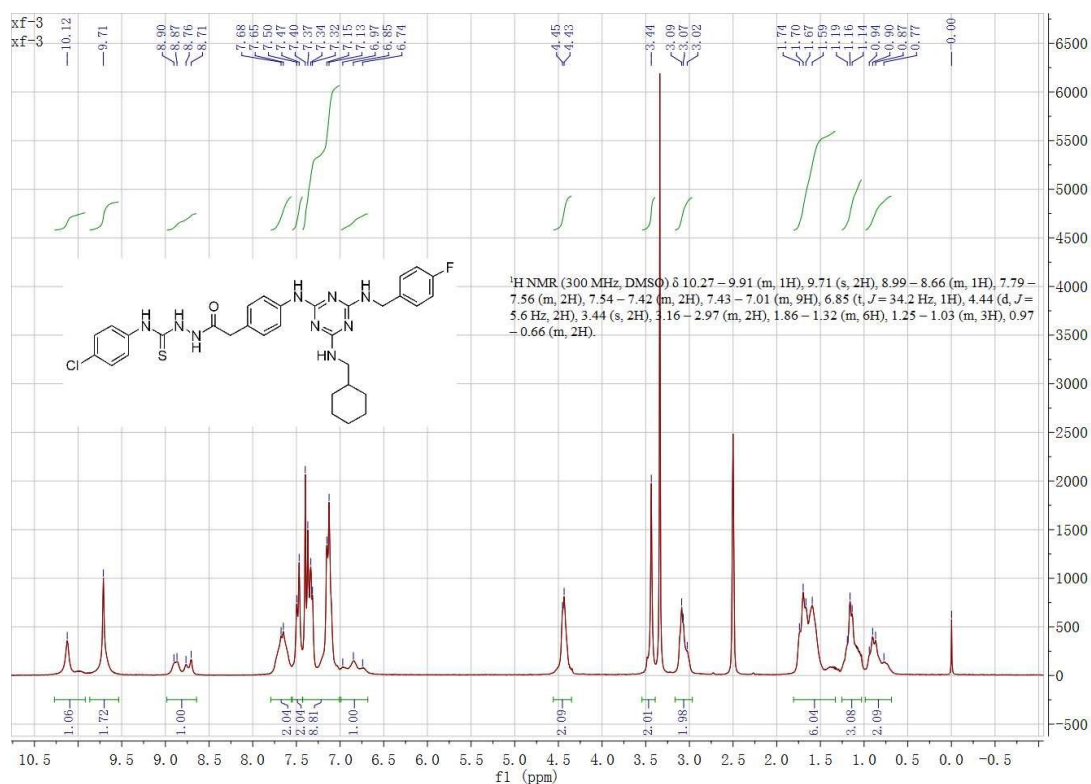

**<sup>1</sup>H-NMR of 10c**

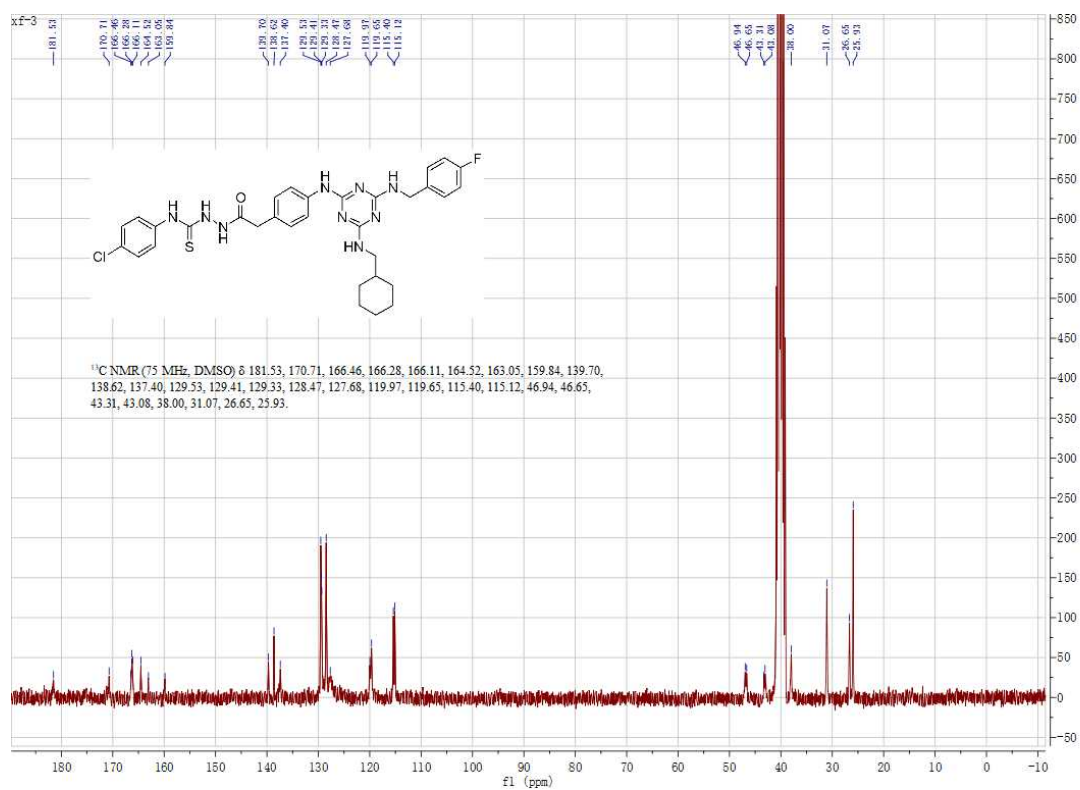

**<sup>13</sup>C-NMR of 10c**

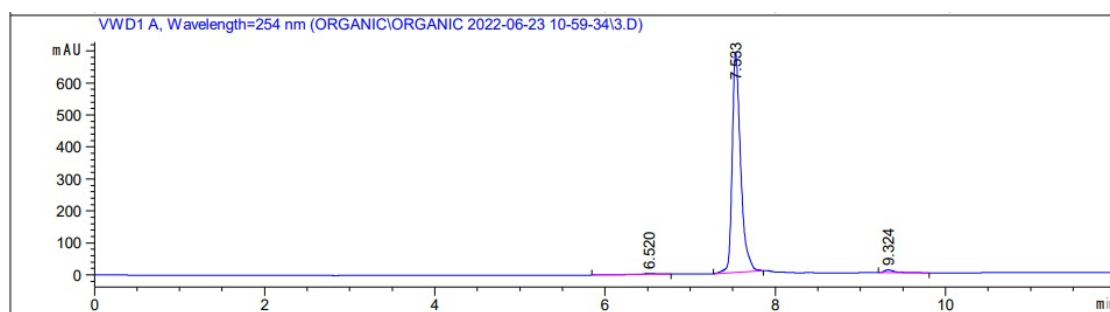

HPLC purity of 10c

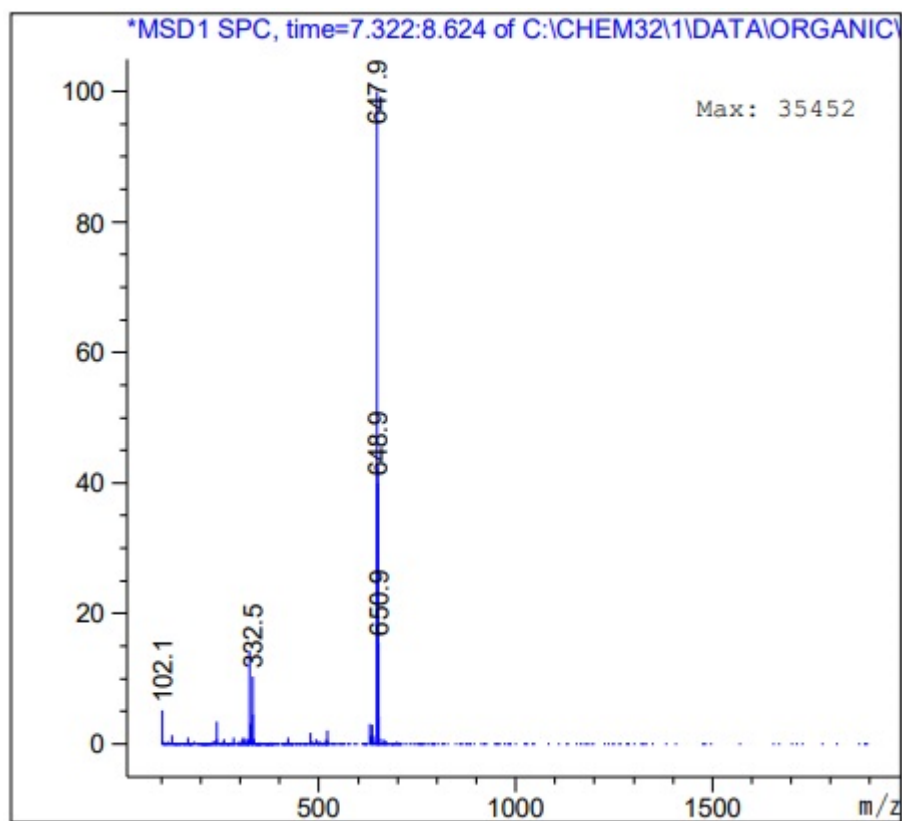

ESI-MS of 10c

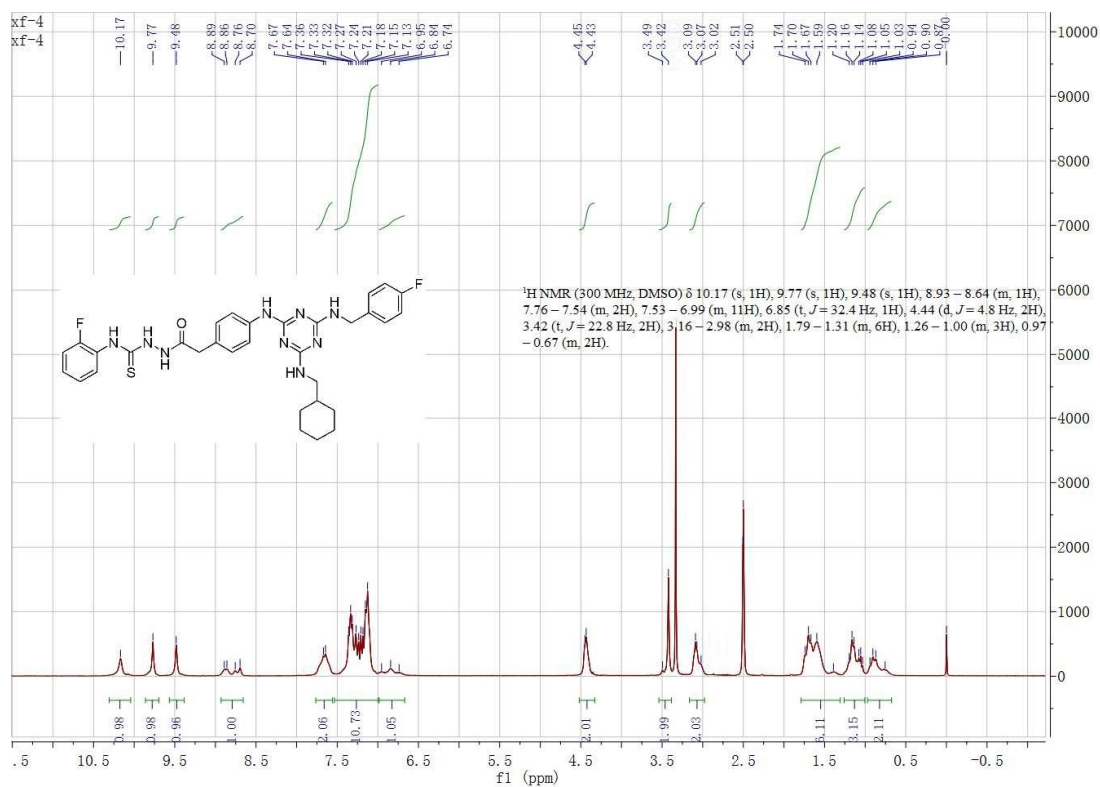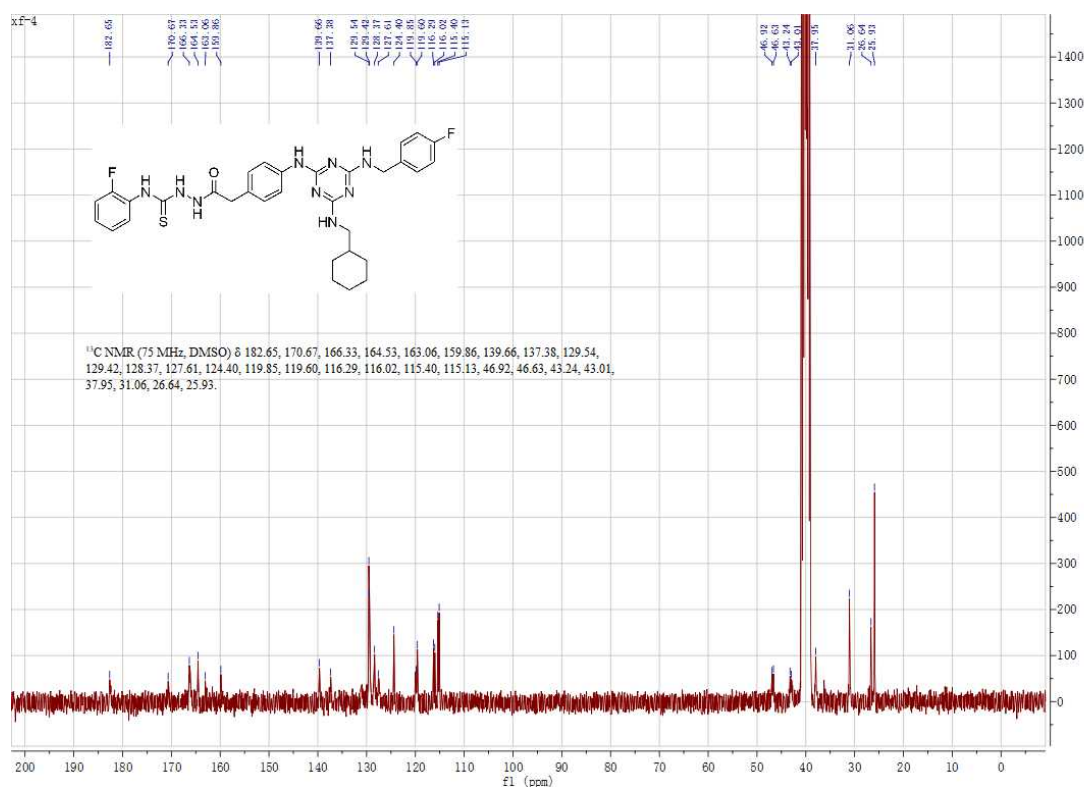

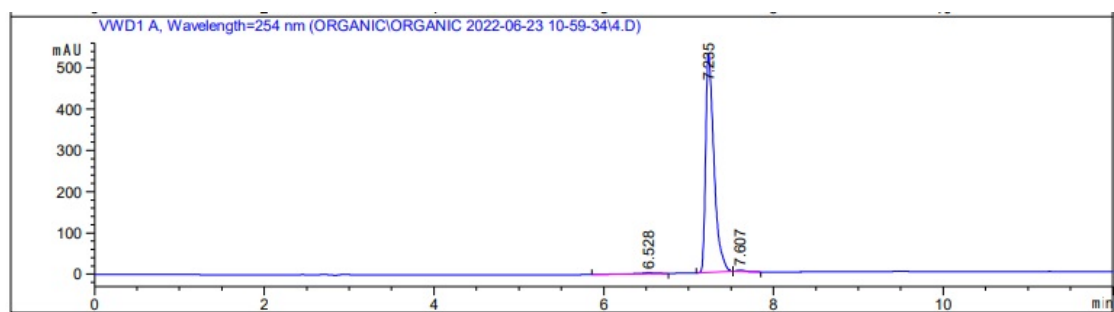

**HPLC purity of 10d**

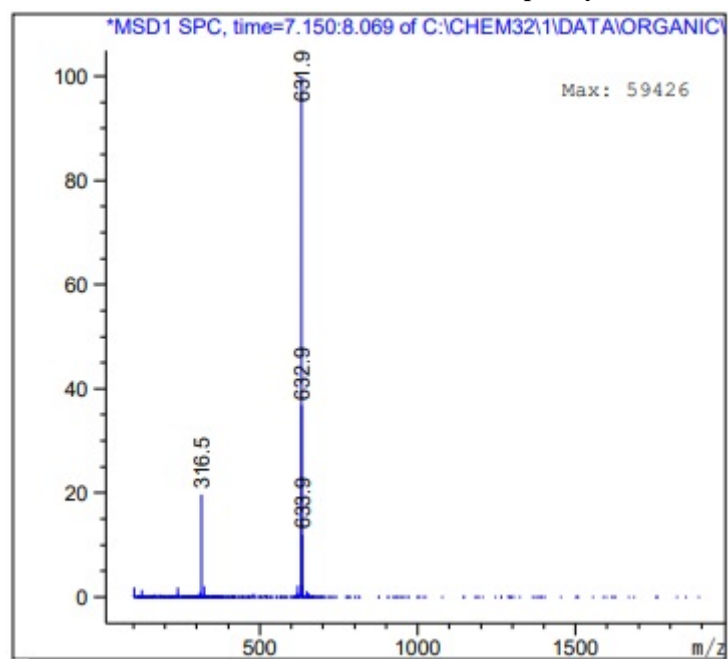

**ESI-MS of 10d**

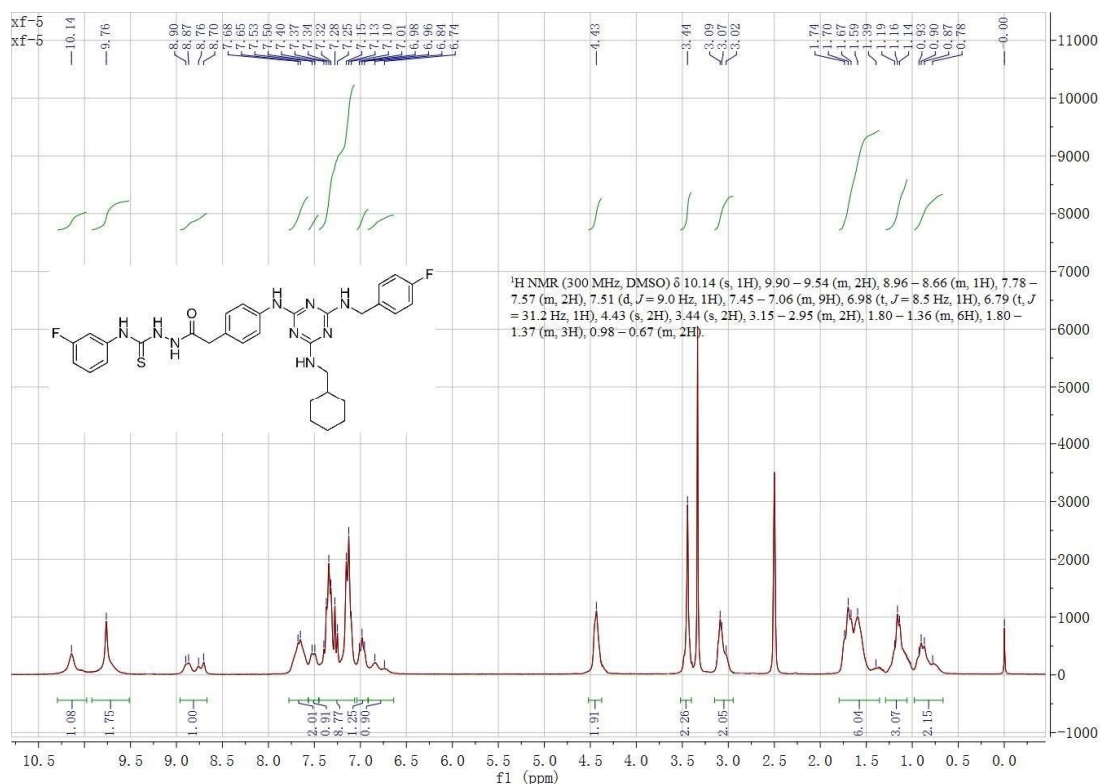

**<sup>1</sup>H-NMR of 10e**

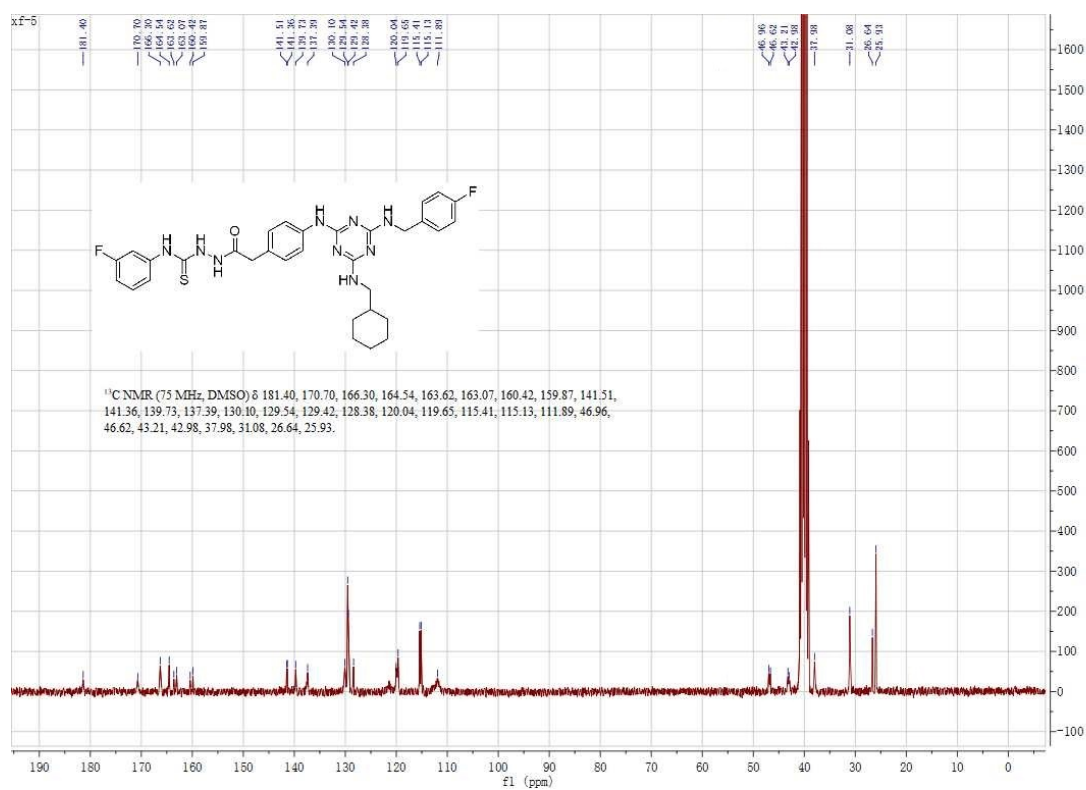

**<sup>13</sup>C-NMR of 10e**

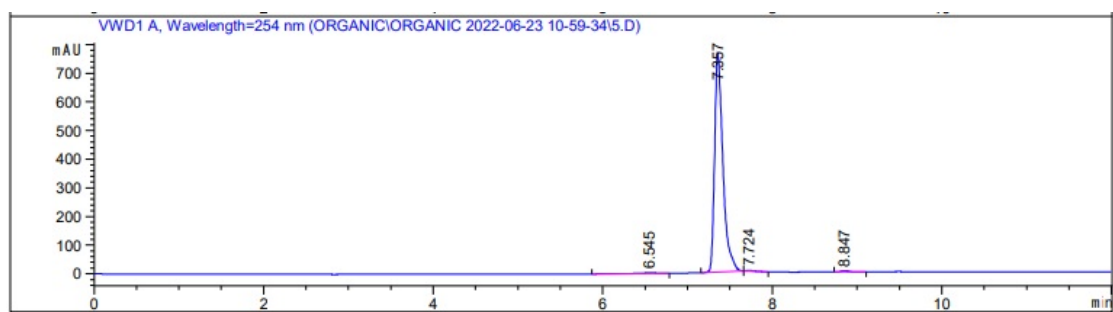

HPLC purity of 10e

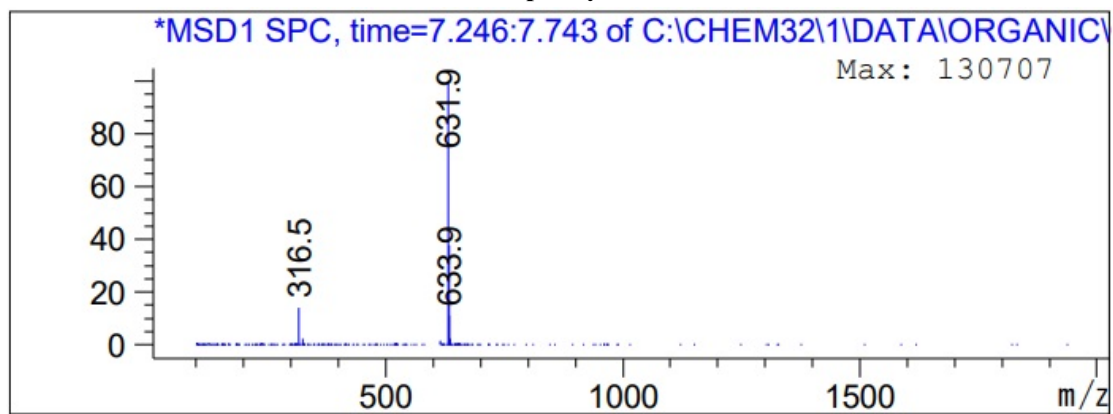

ESI-MS of 10e



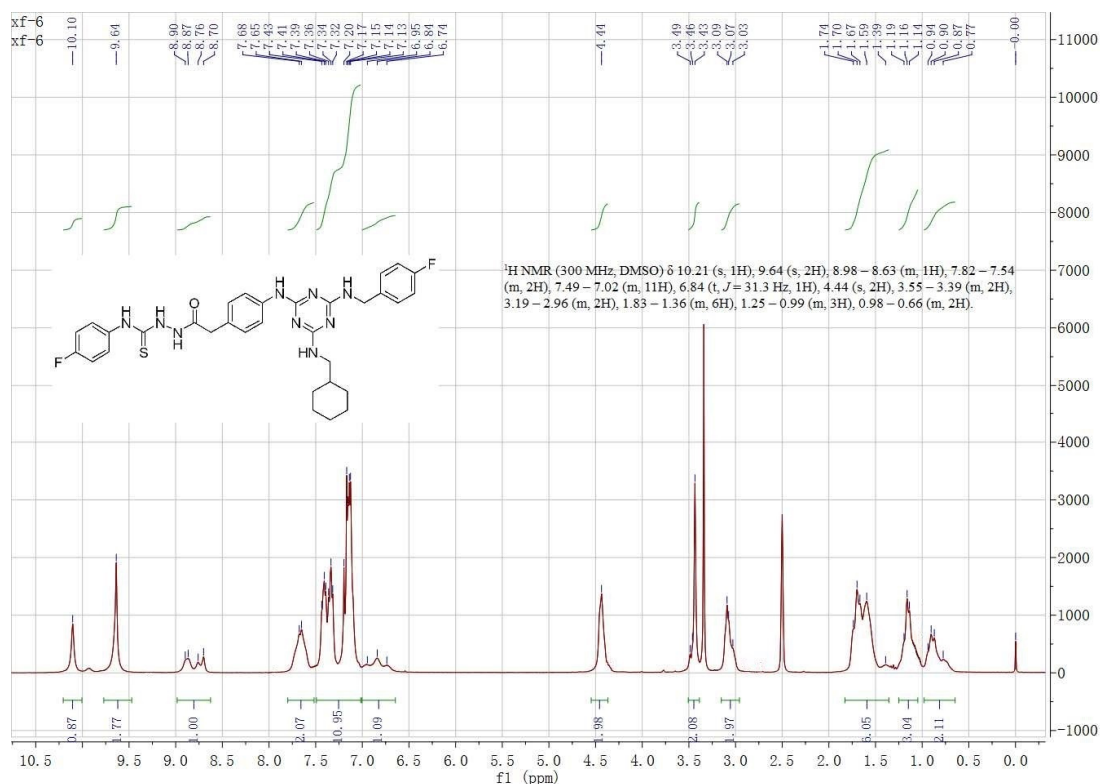

**<sup>1</sup>H-NMR of 10f**

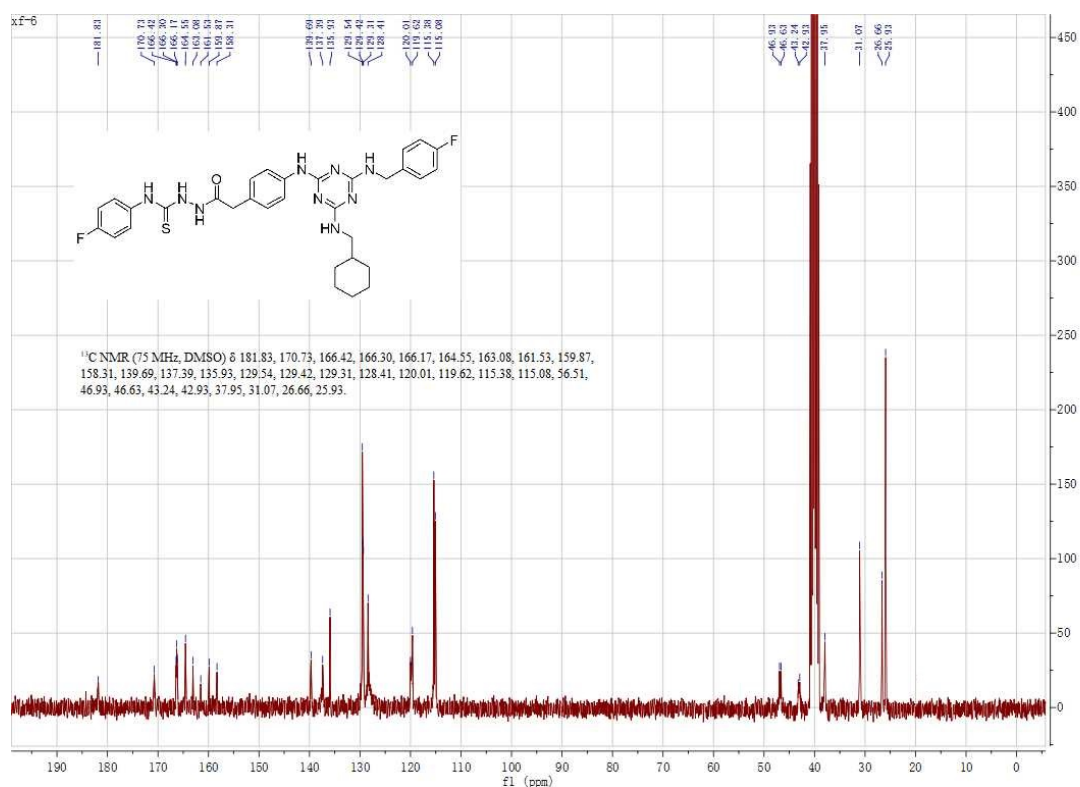

**<sup>13</sup>C-NMR of 10f**

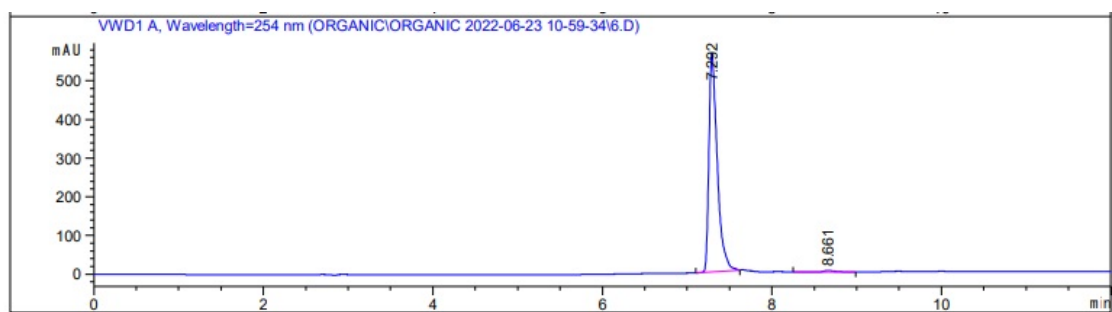

**HPLC purity of 10f**

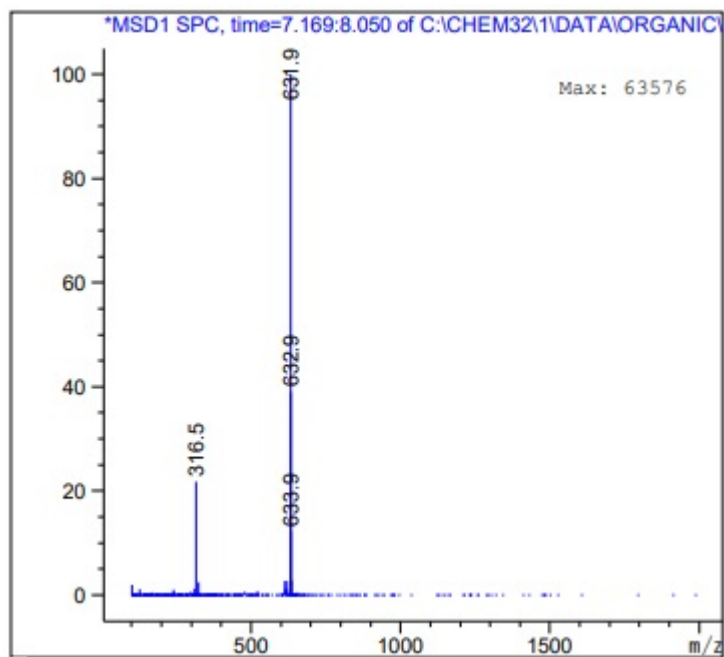

**ESI-MS of 10f**

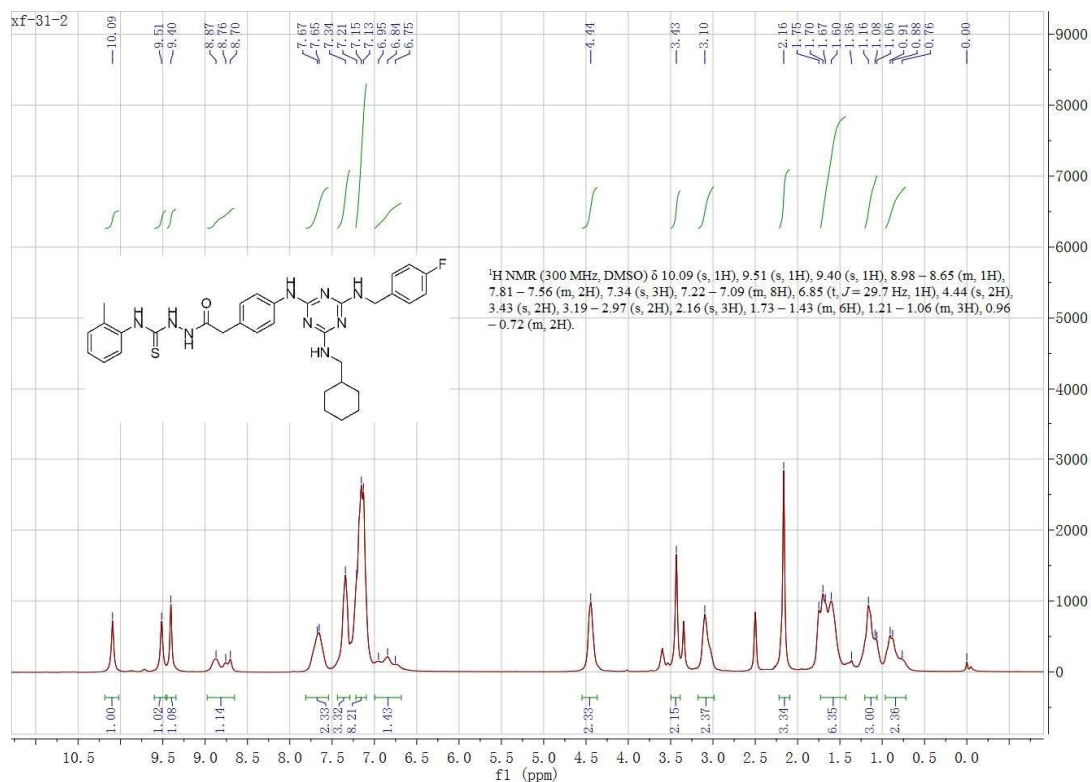

**<sup>1</sup>H-NMR of 10g**

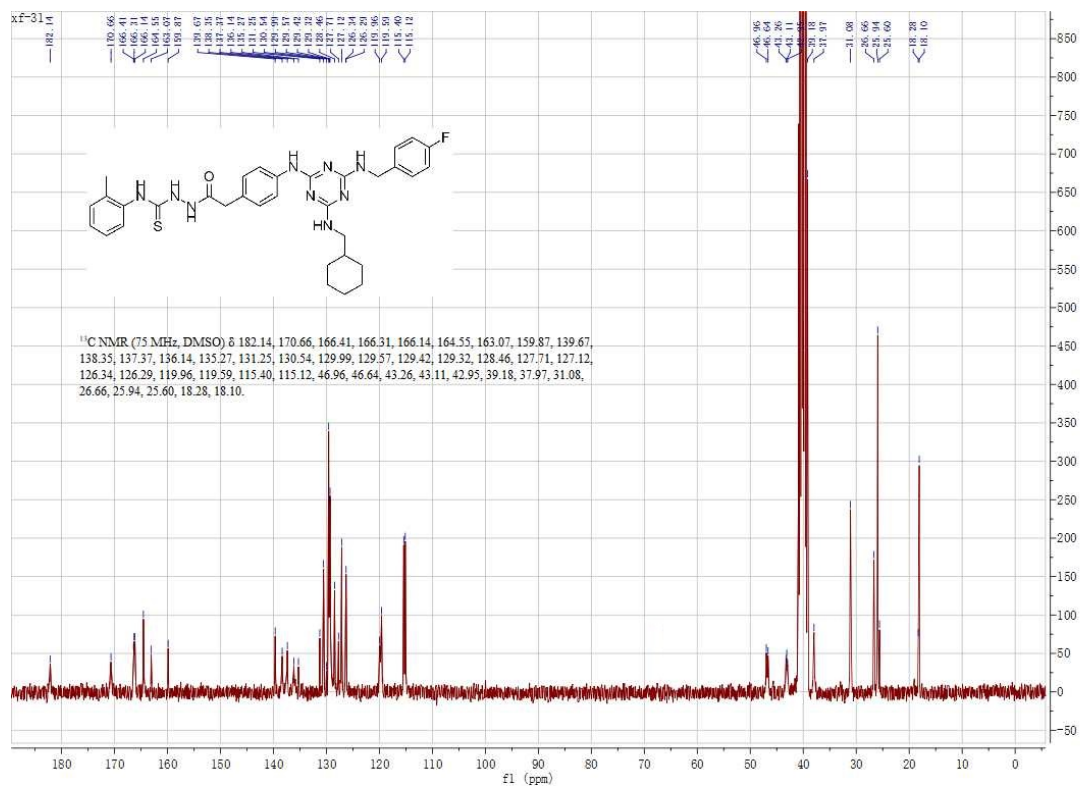

**<sup>13</sup>C-NMR of 10g**

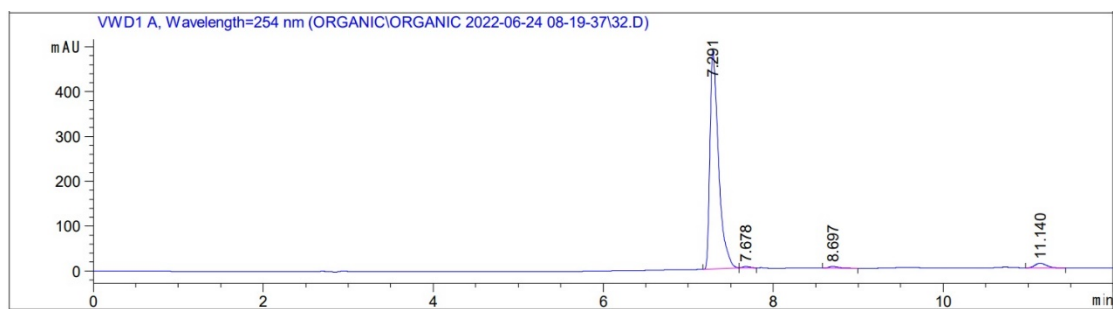

HPLC purity of 10g

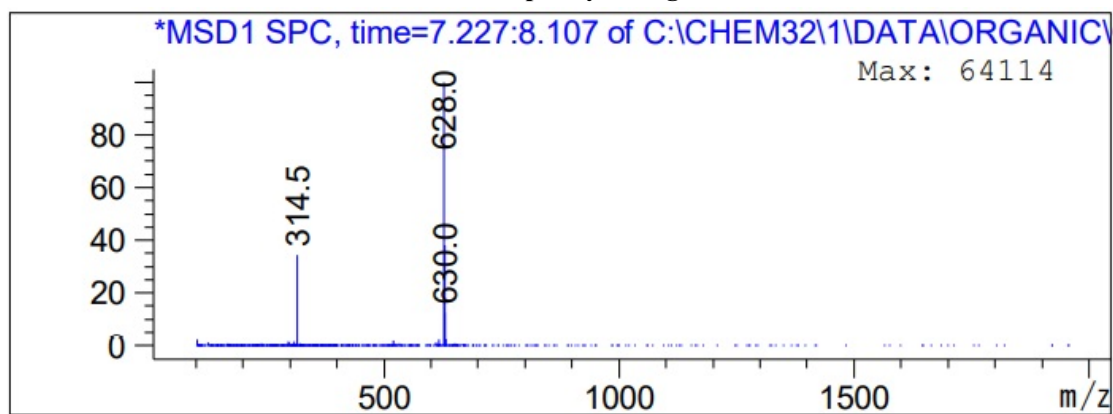

ESI-MS of 10g

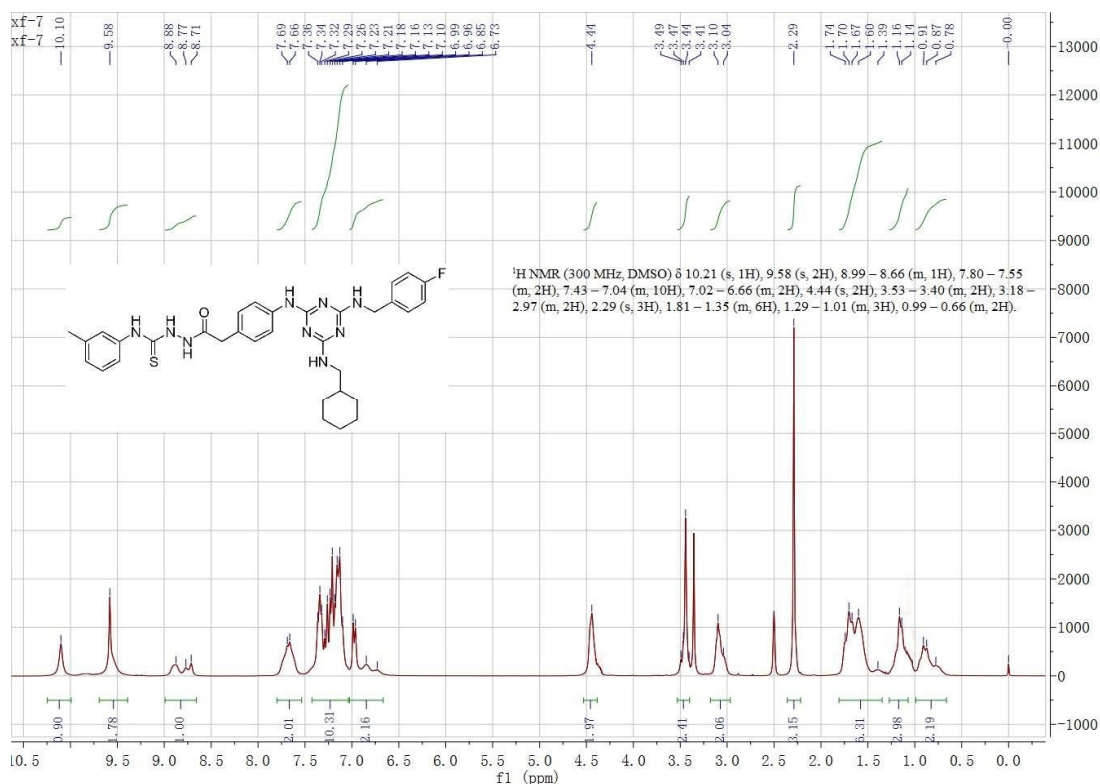

**<sup>1</sup>H-NMR of 10h**

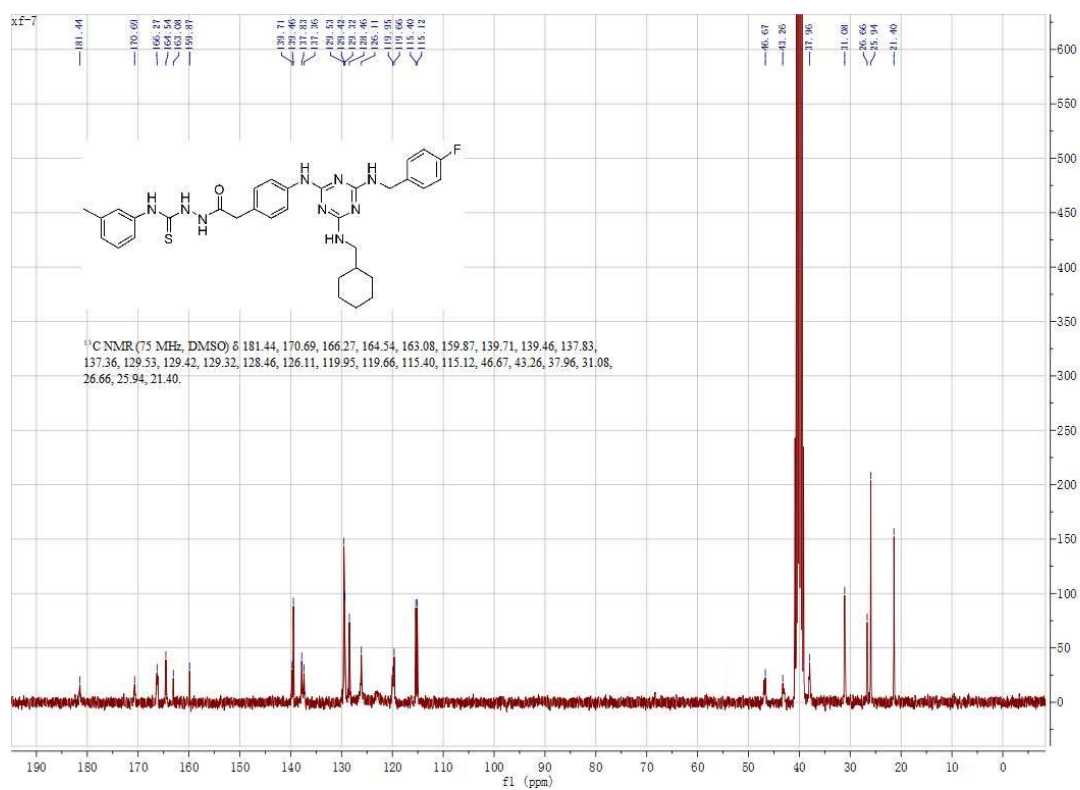

**<sup>13</sup>C-NMR of 10h**

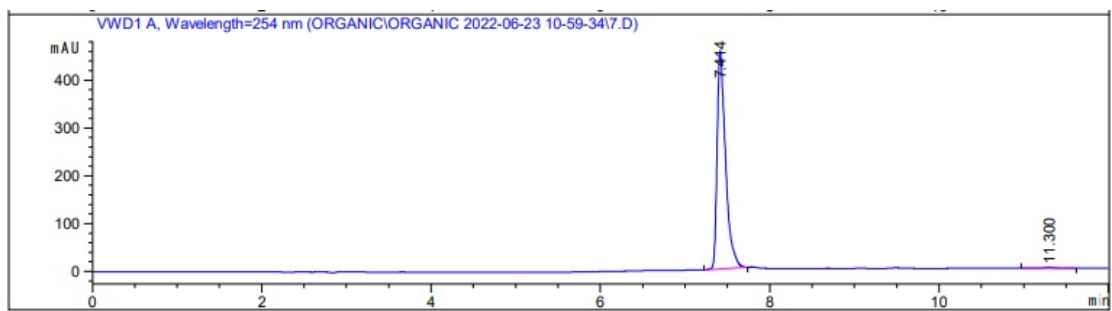

**HPLC purity of 10h**

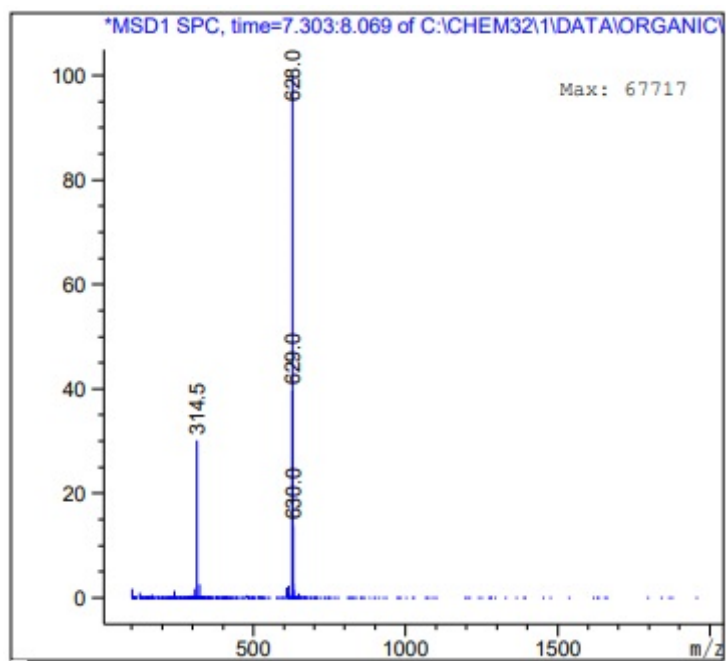

**ESI-MS of 10h**

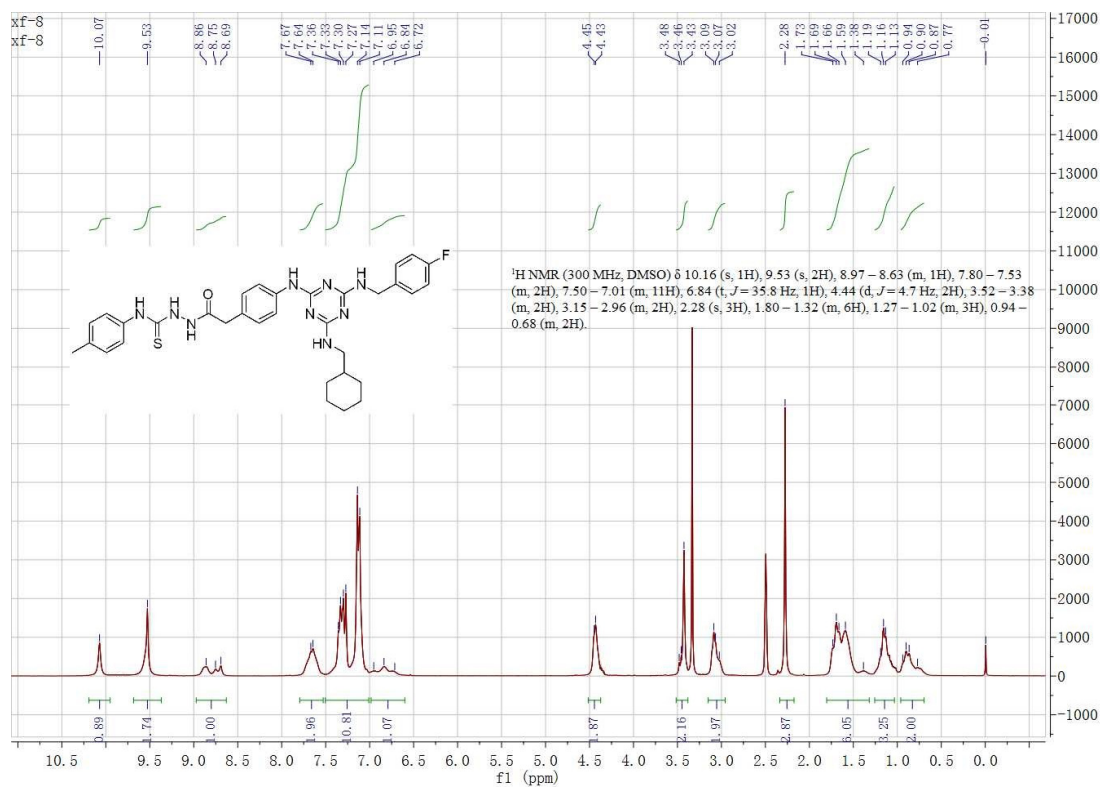

**<sup>1</sup>H-NMR of 10i**

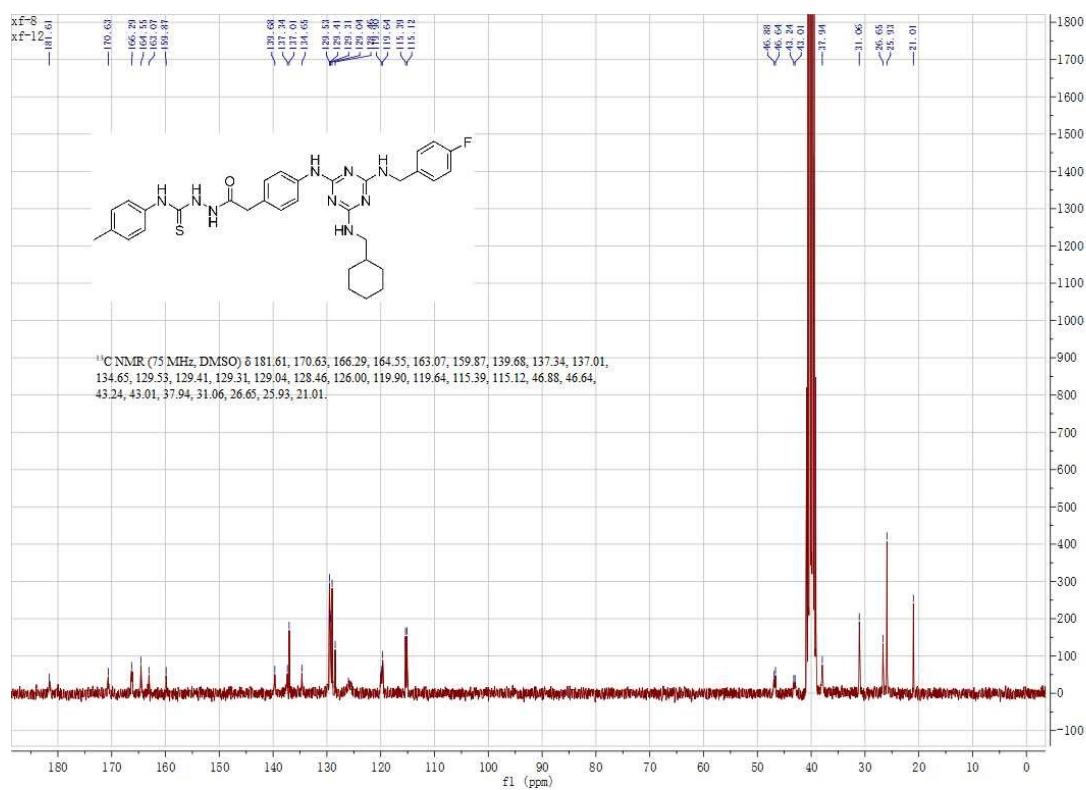

**<sup>13</sup>C-NMR of 10i**

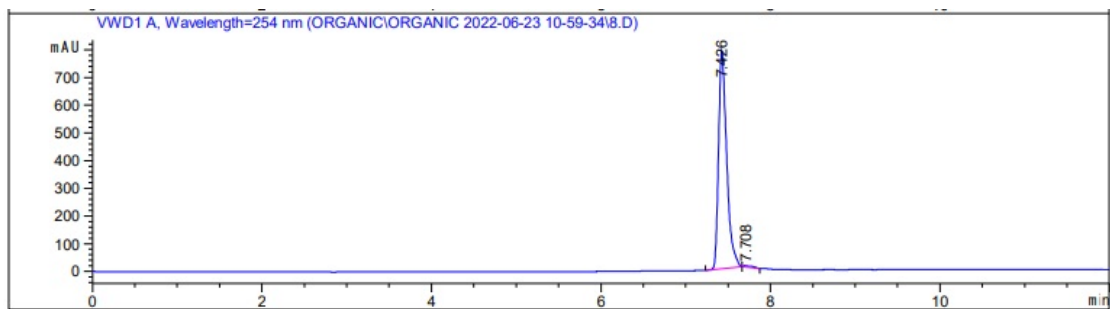

**HPLC purity of 10i**

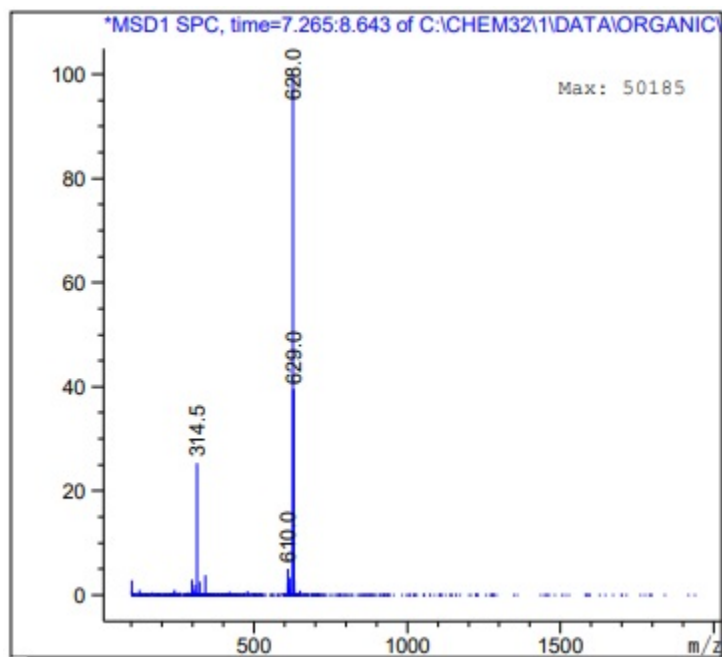

**ESI-MS of 10i**



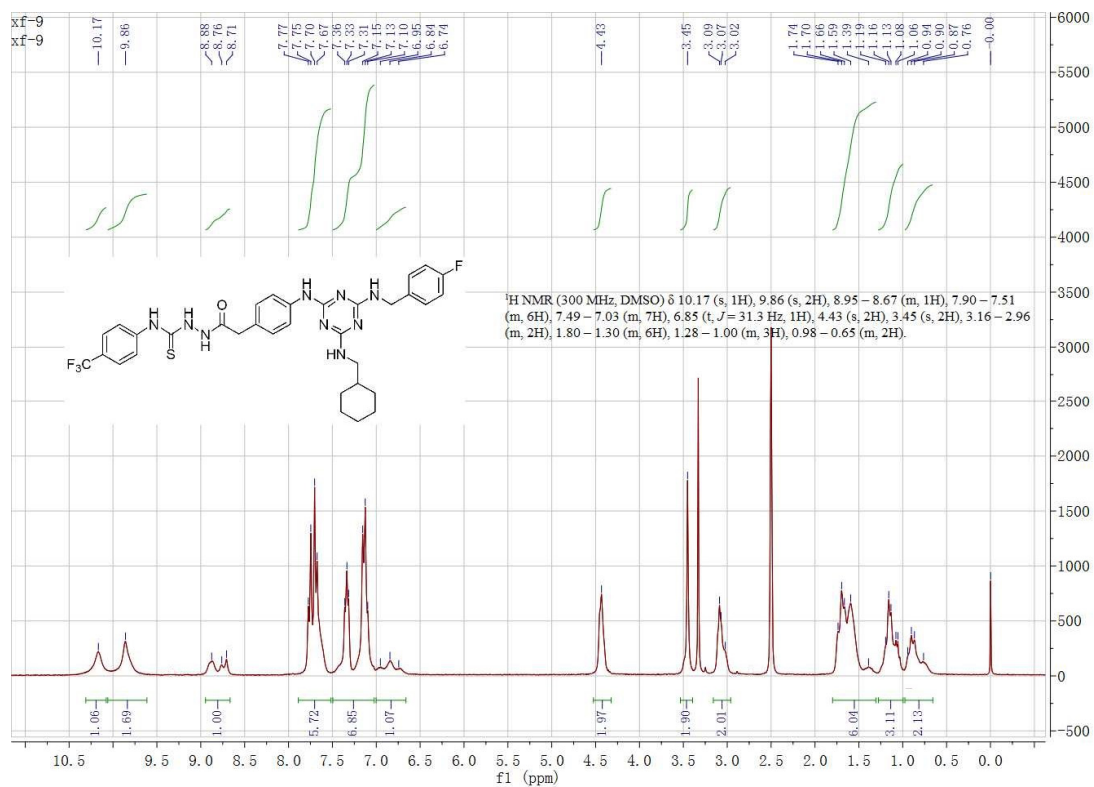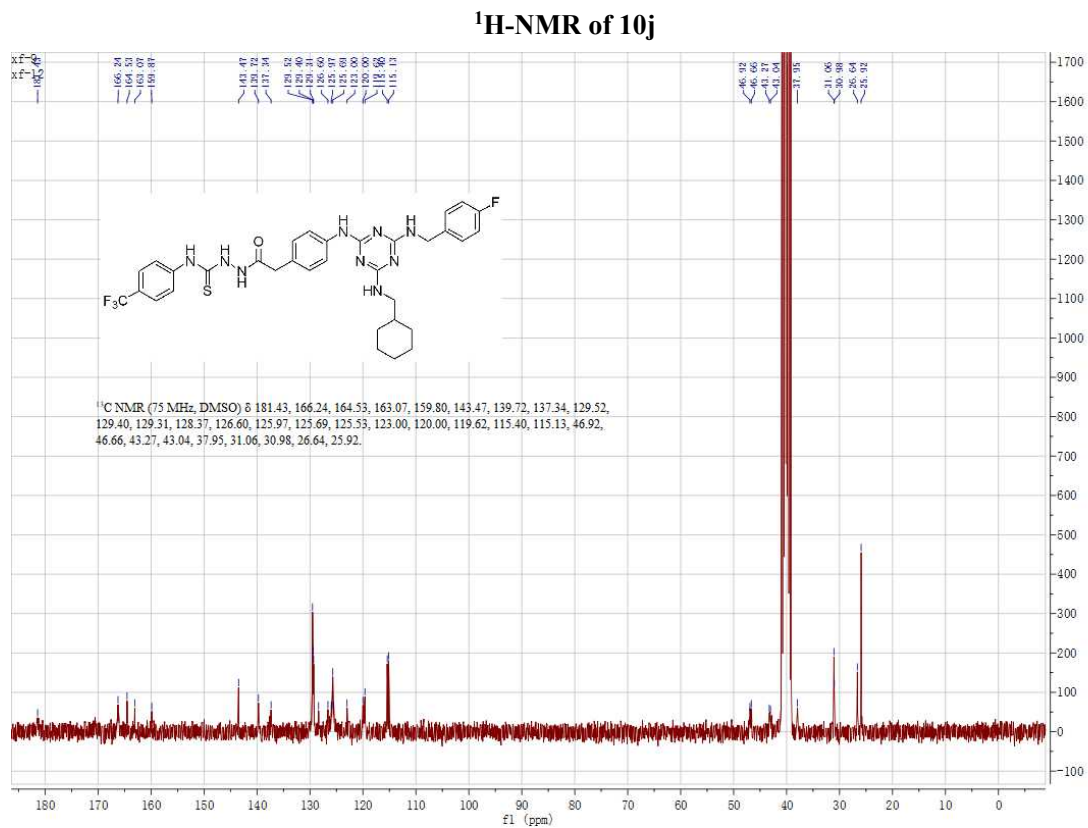

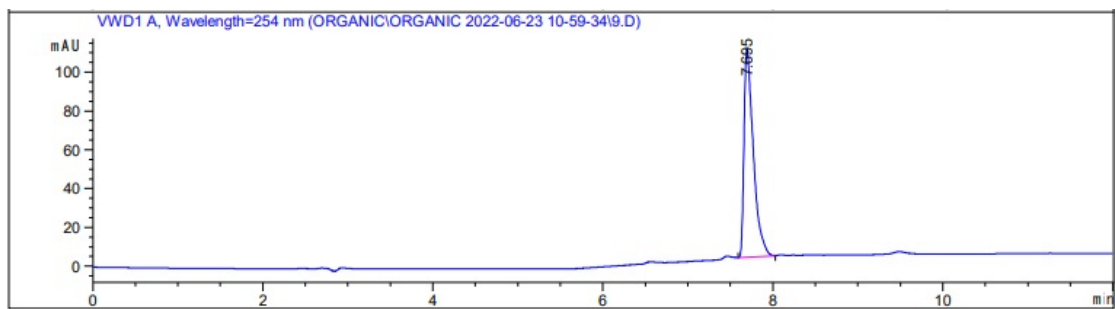

**HPLC purity of 10j**

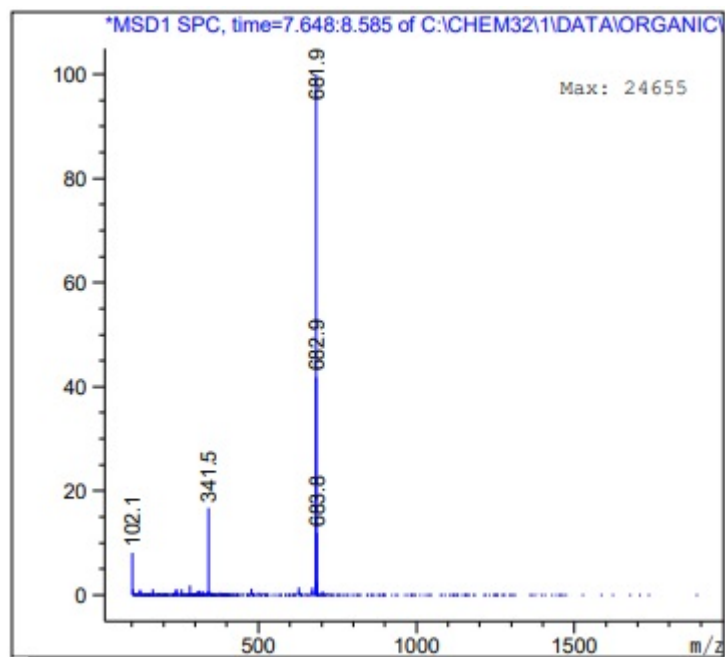

**ESI-MS of 10j**

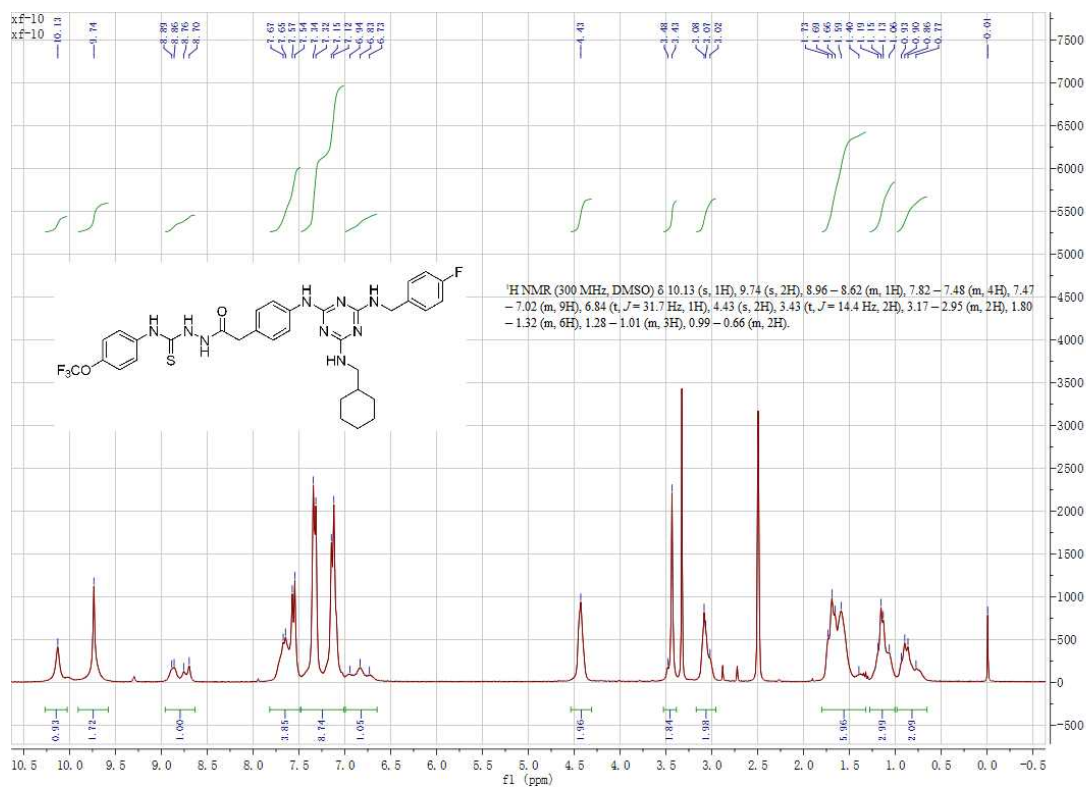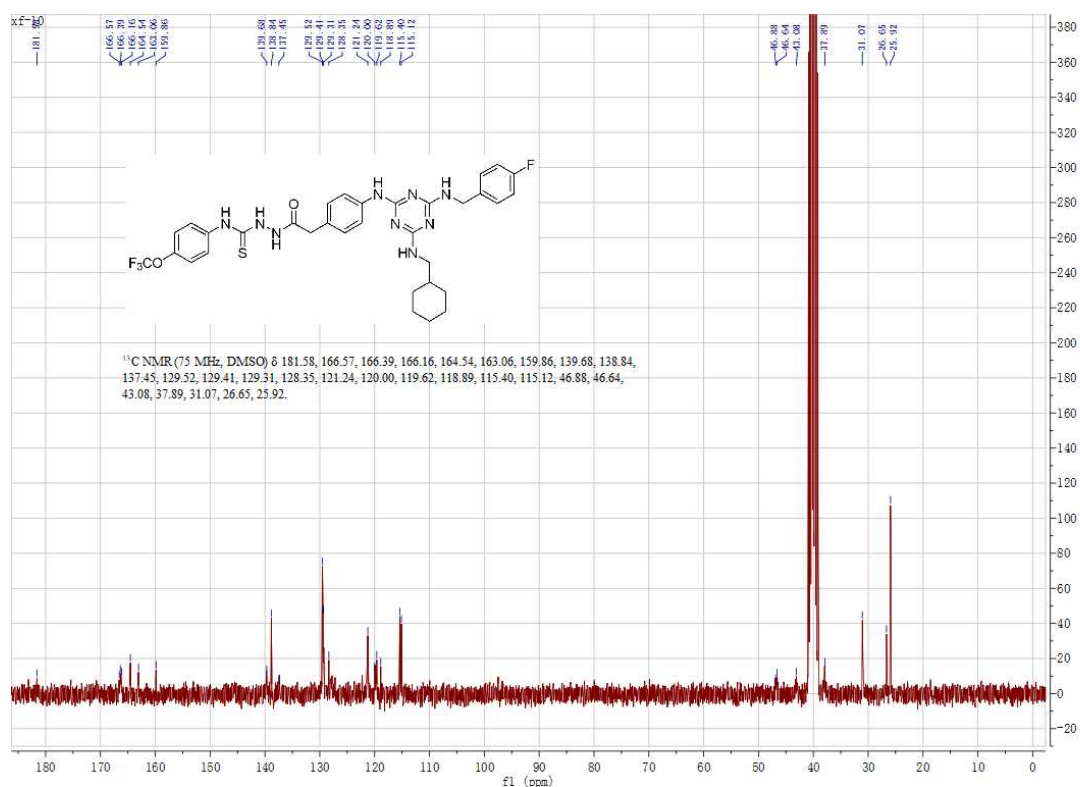

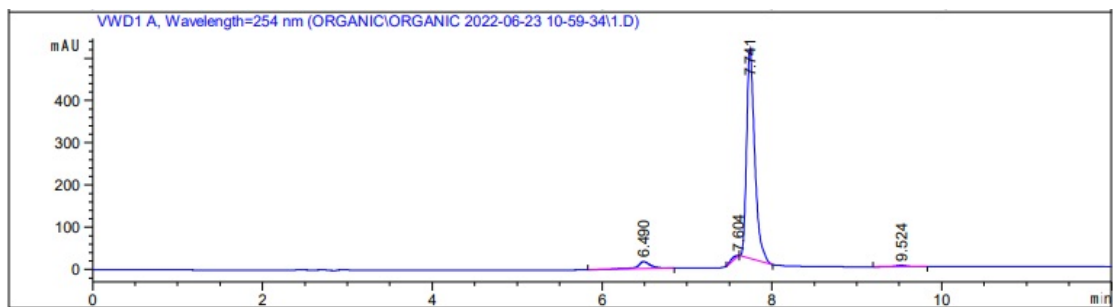

HPLC purity of 10k

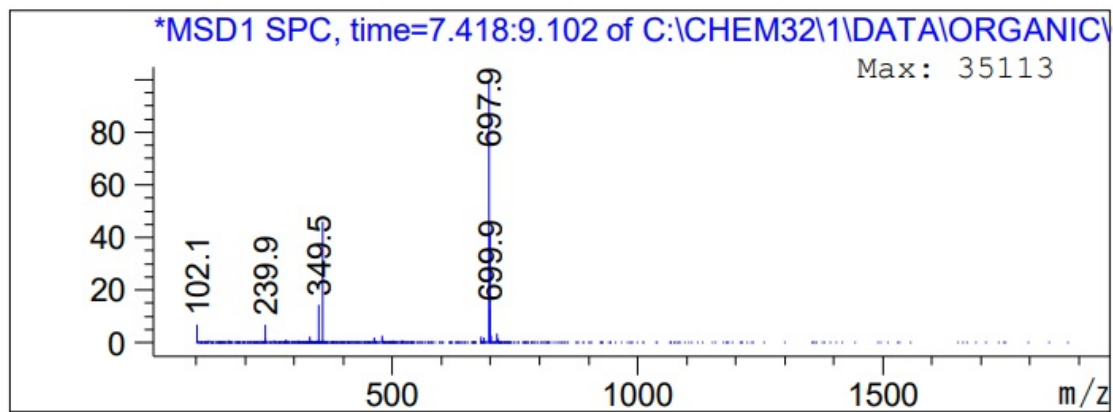

ESI-MS of 10k

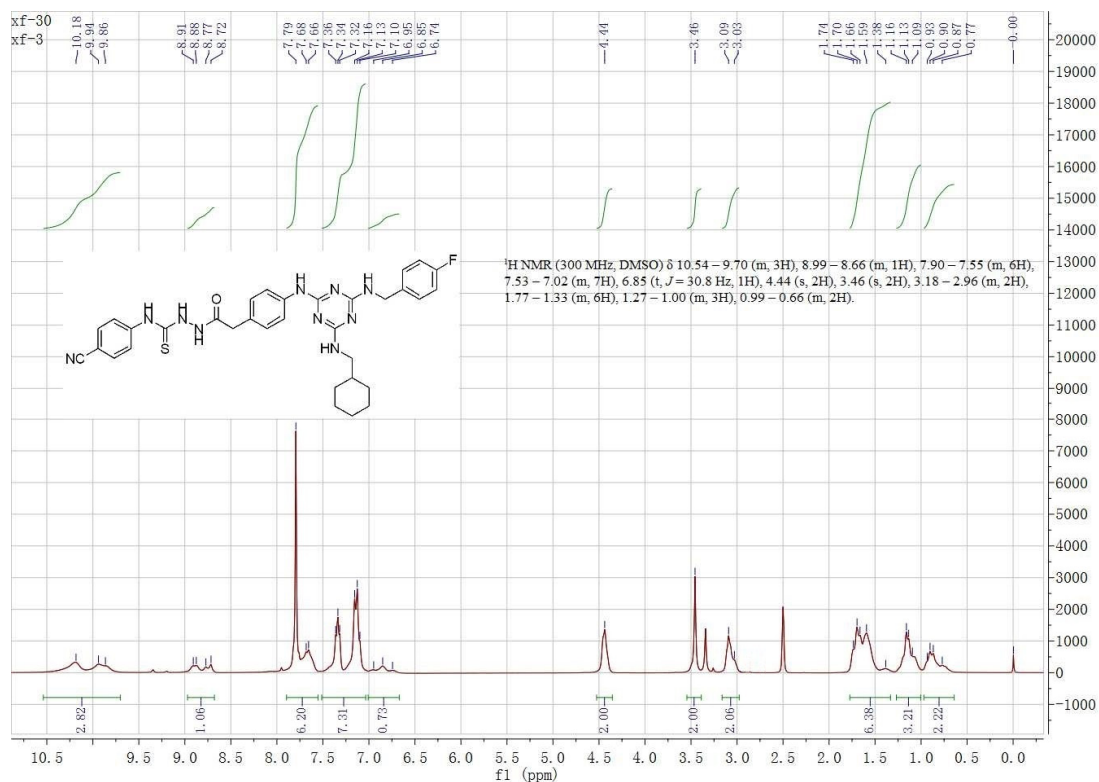

**<sup>1</sup>H-NMR of 10I**

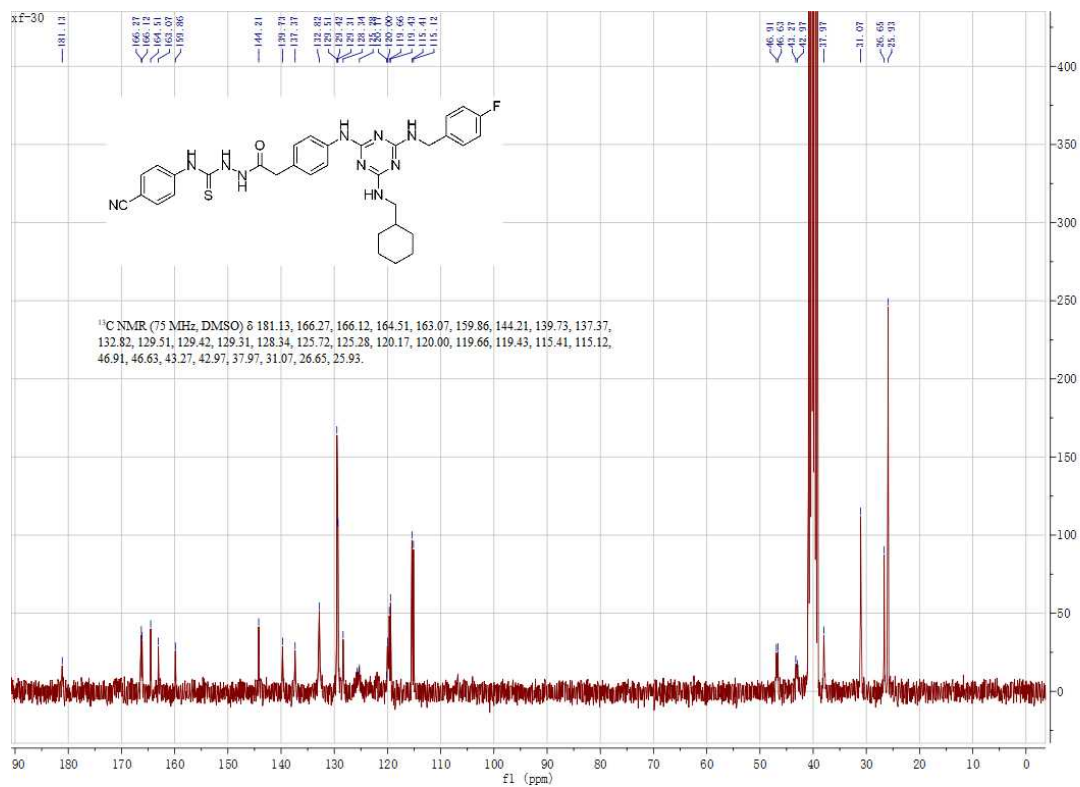

**<sup>13</sup>C-NMR of 10I**

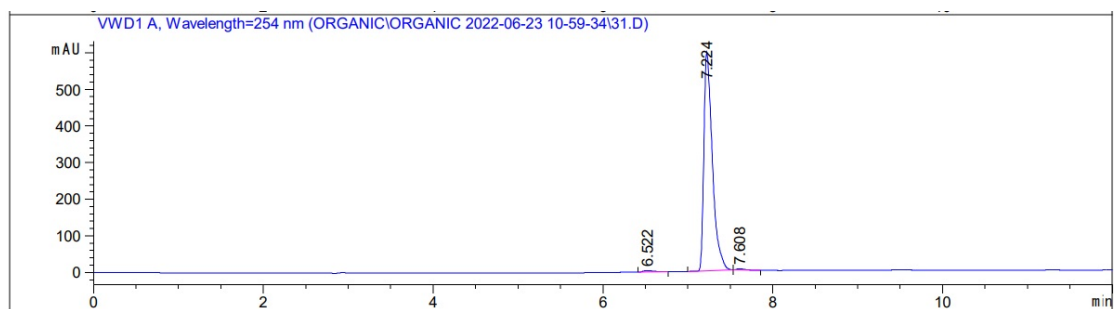

HPLC purity of 10l

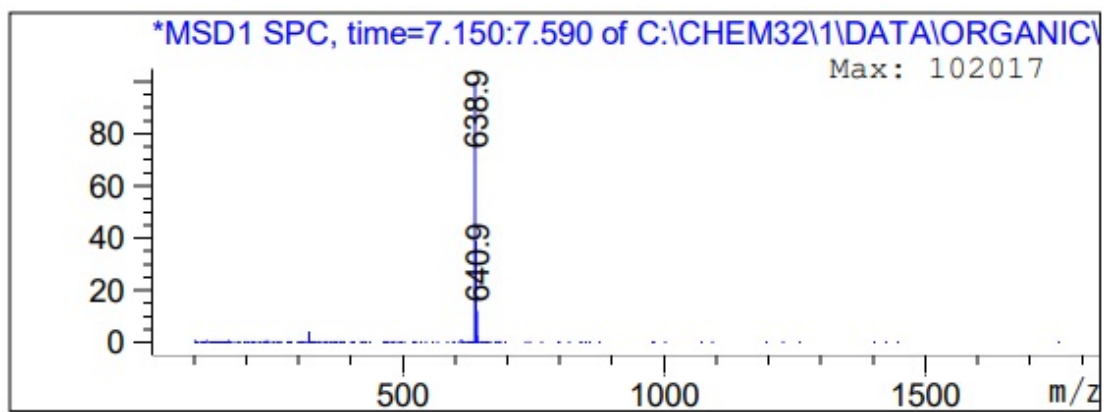

ESI-MS of 10l

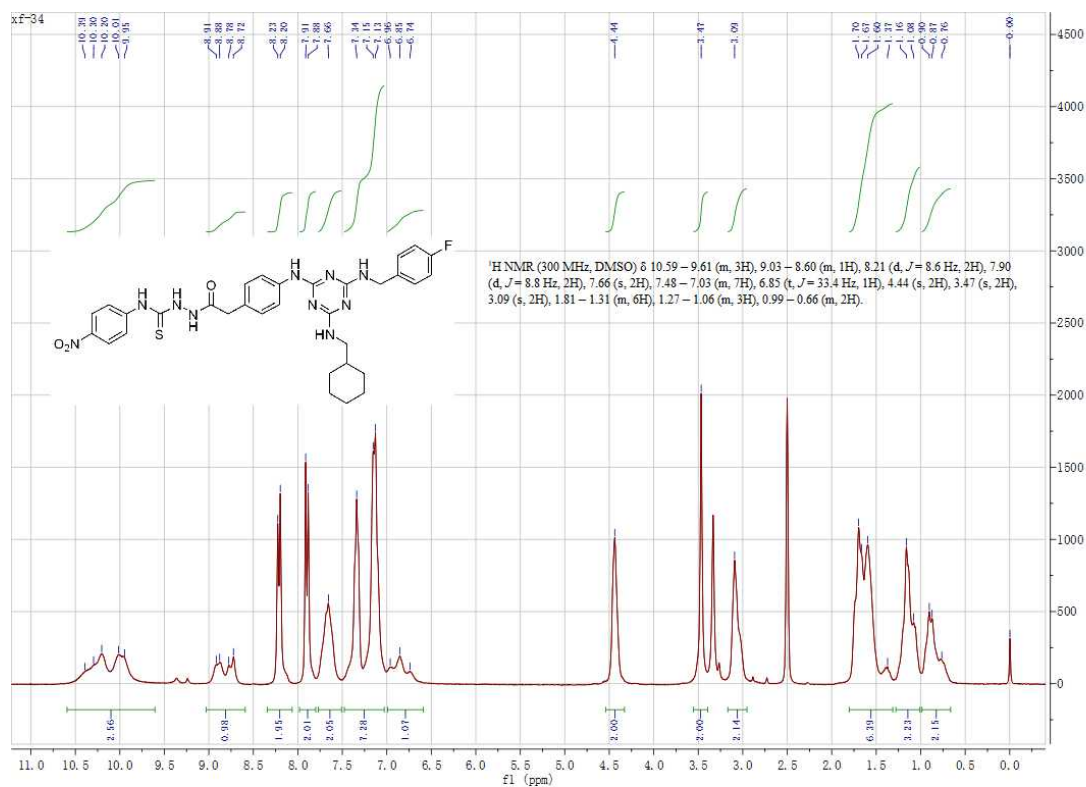

<sup>1</sup>H-NMR of 10m

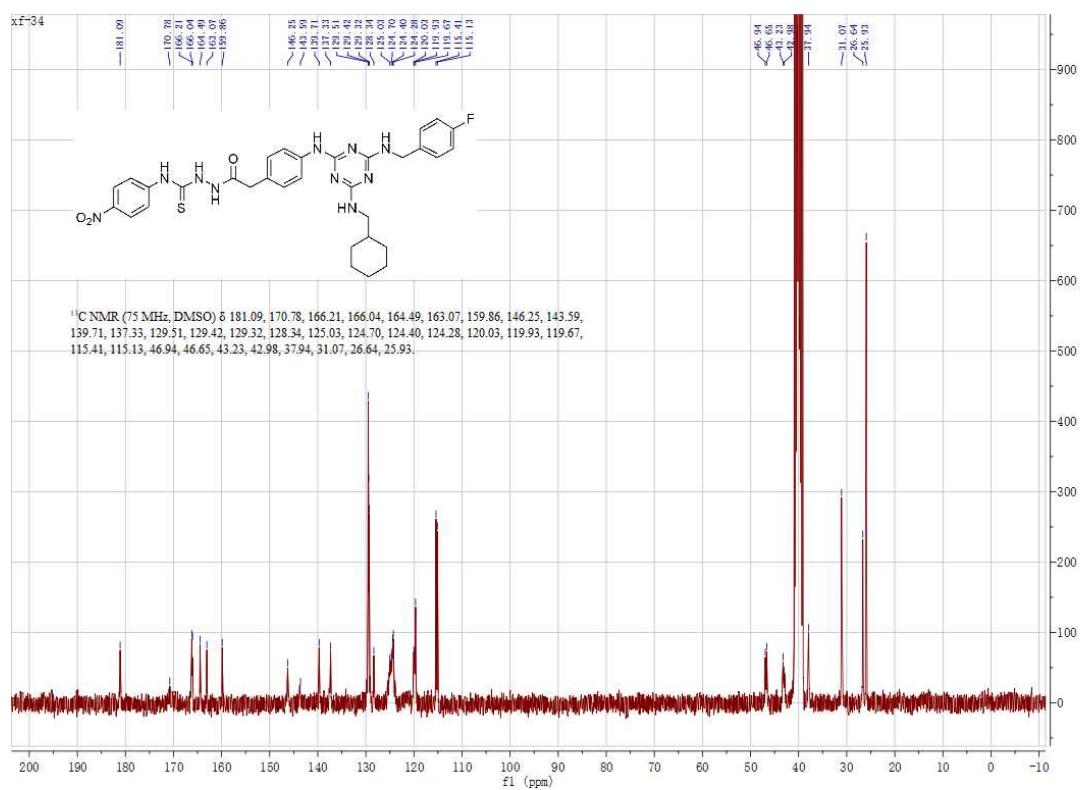

<sup>13</sup>C-NMR of 10m

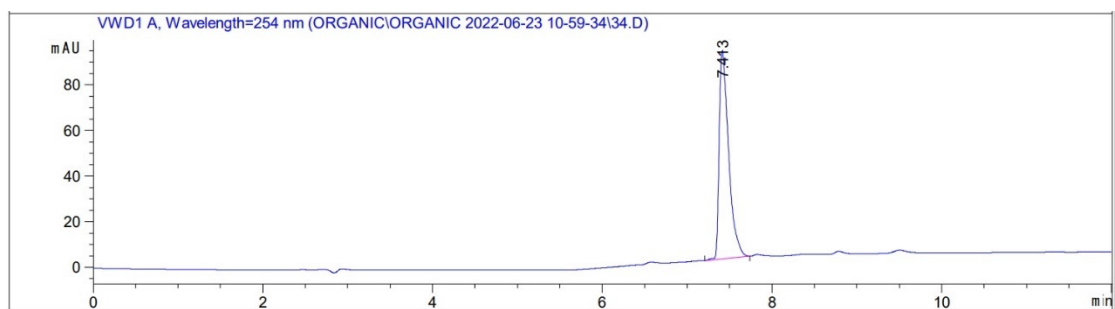

HPLC purity of 10m

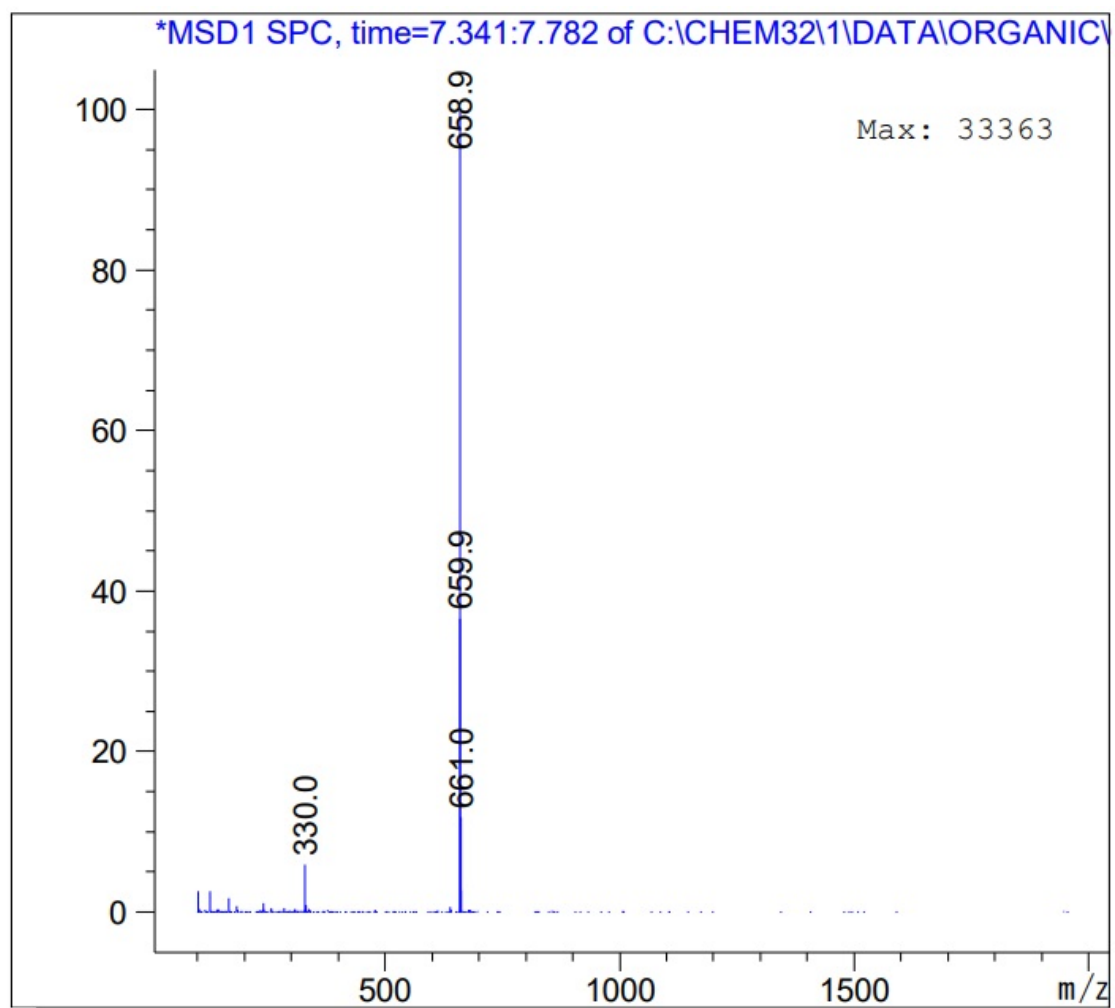

ESI-MS of 10m



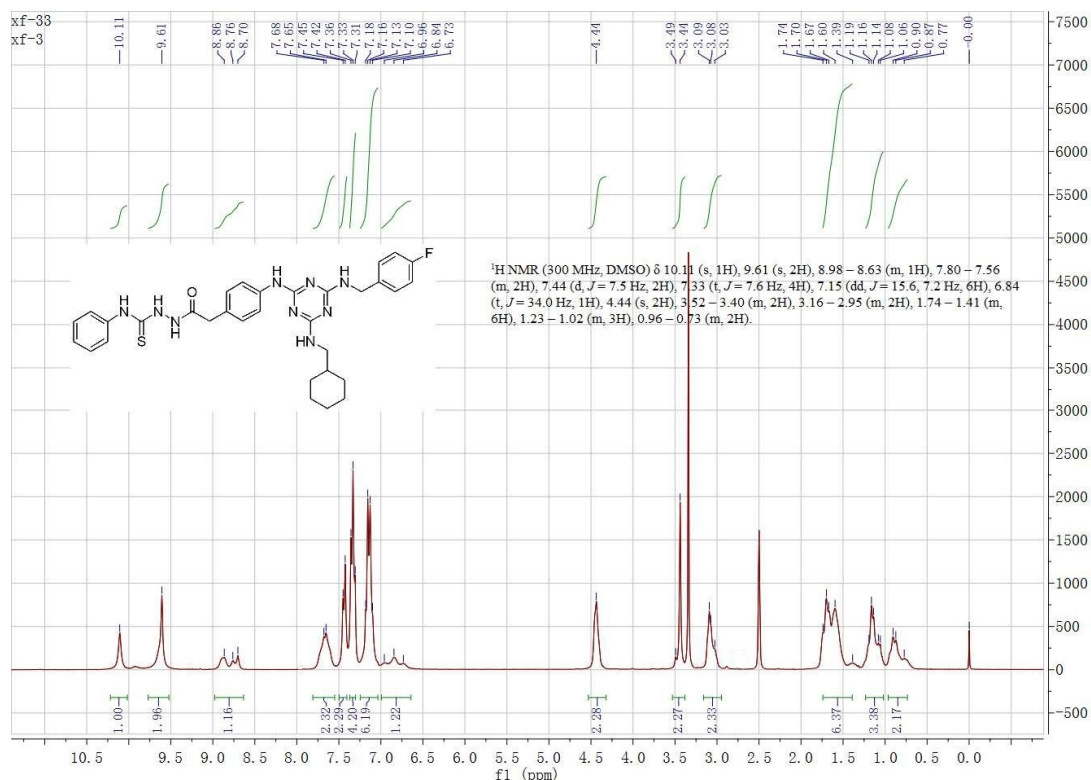

$^1\text{H-NMR}$  of 10n

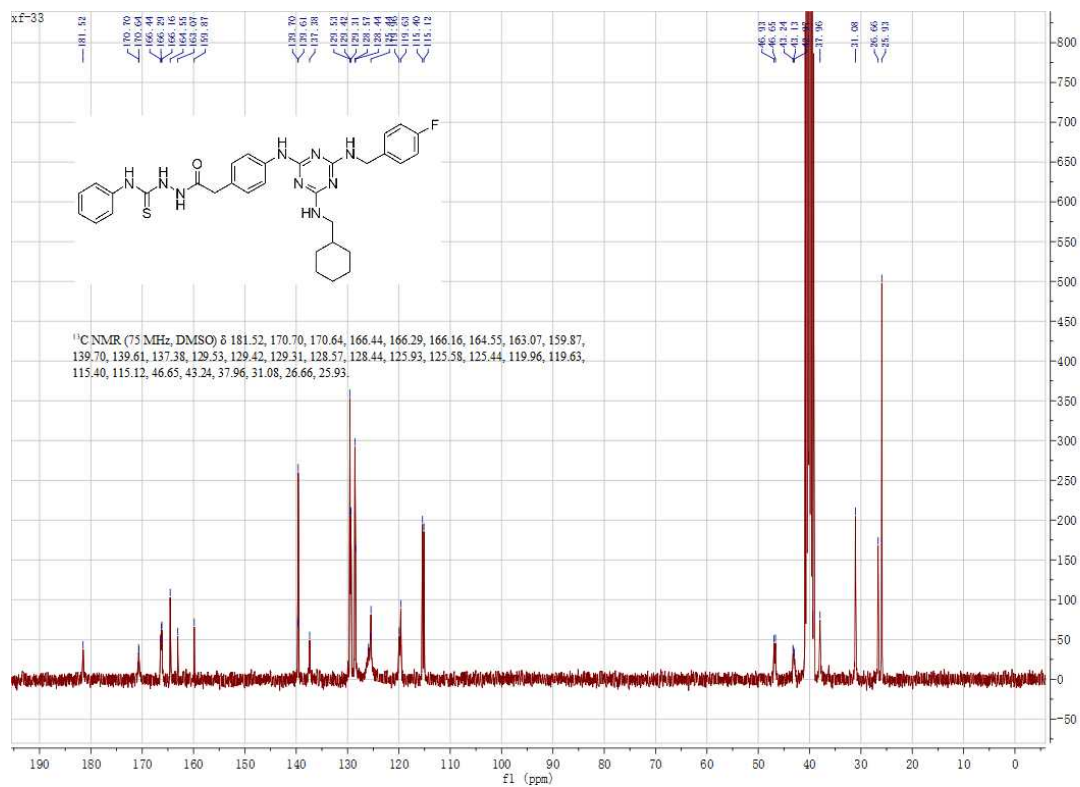

$^{13}\text{C-NMR}$  of 10n

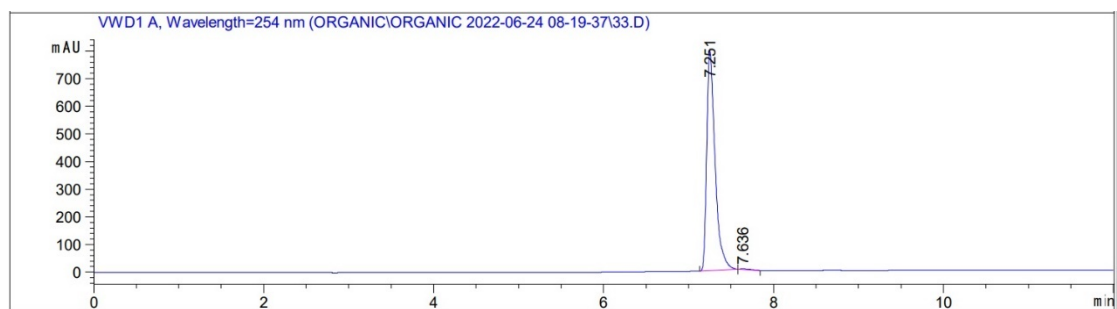

HPLC purity of 10n

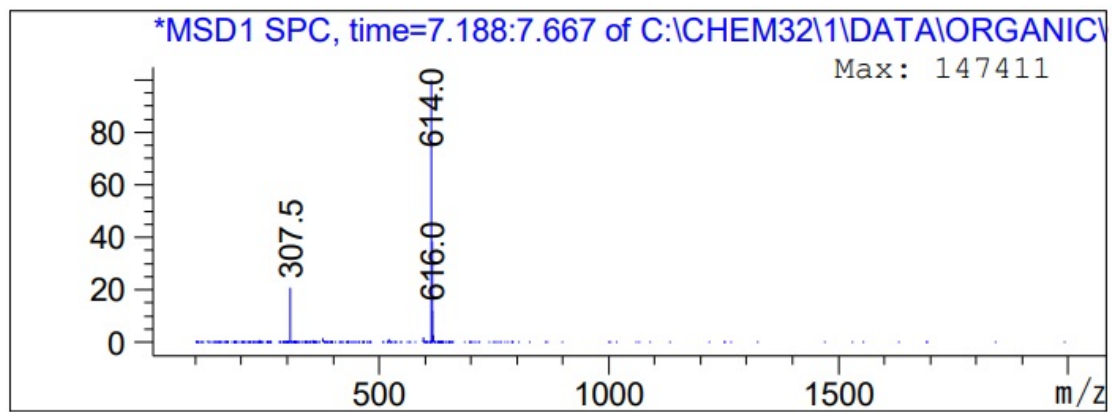

ESI-MS of 10n

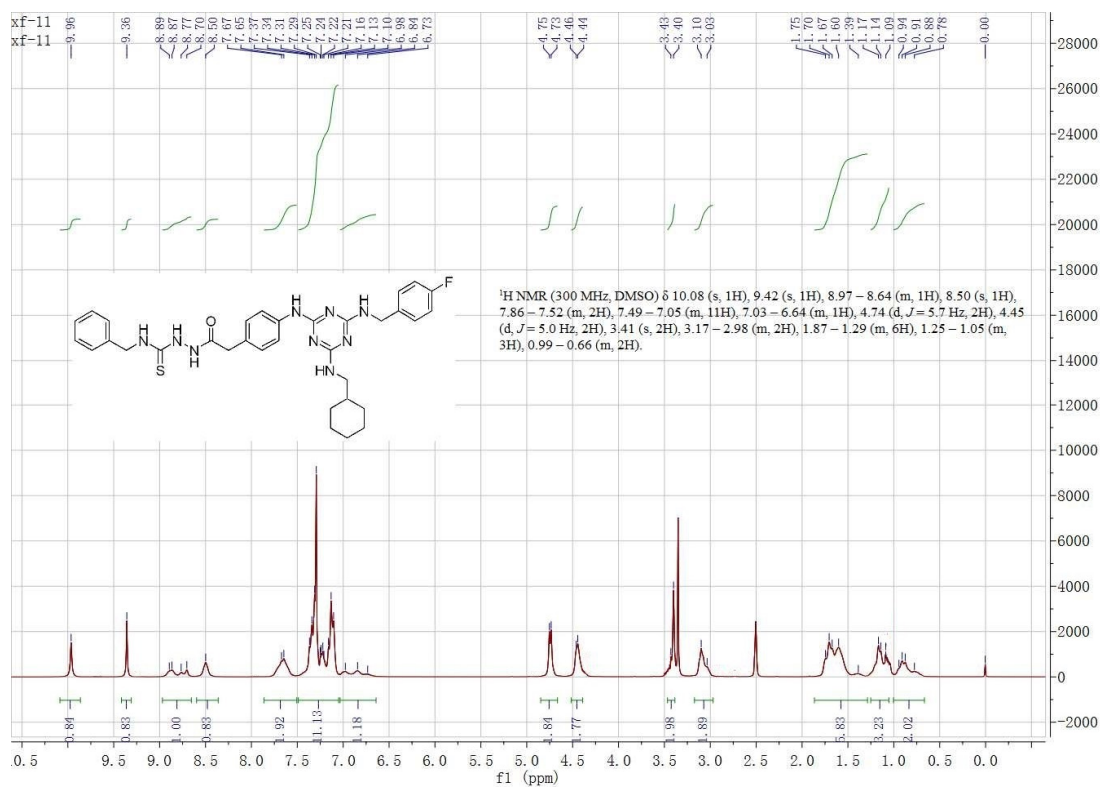

**<sup>1</sup>H-NMR of 10o**

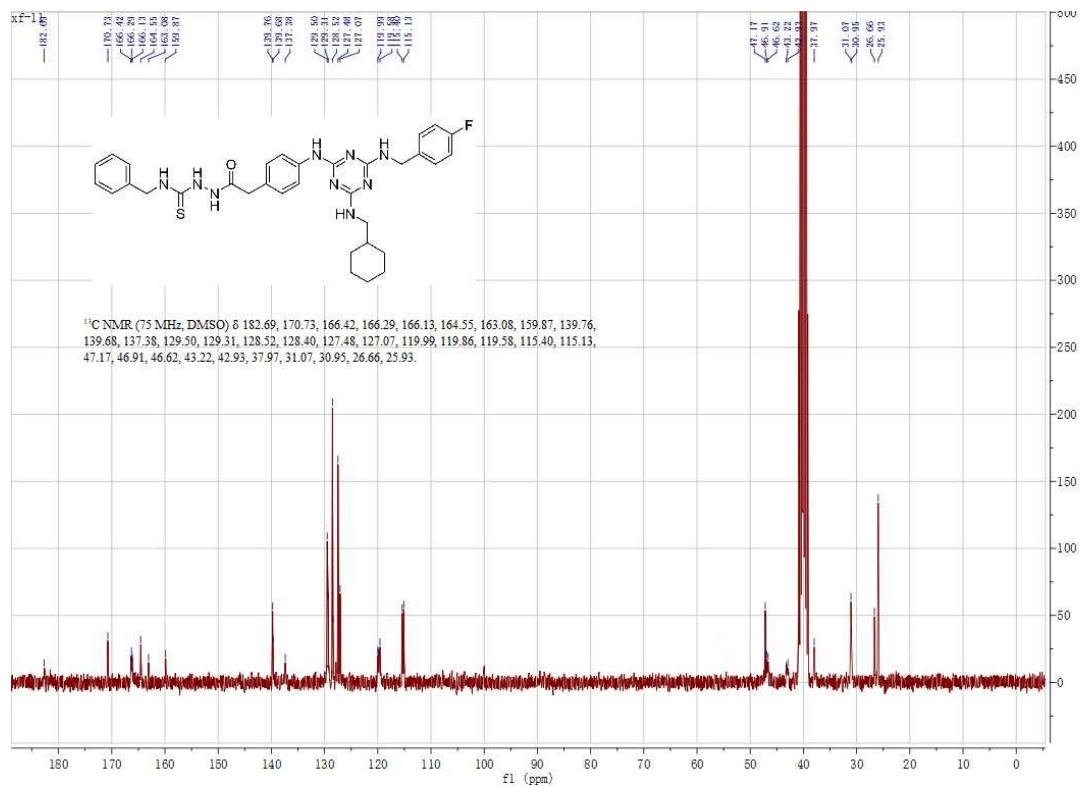

**<sup>13</sup>C-NMR of 10o**

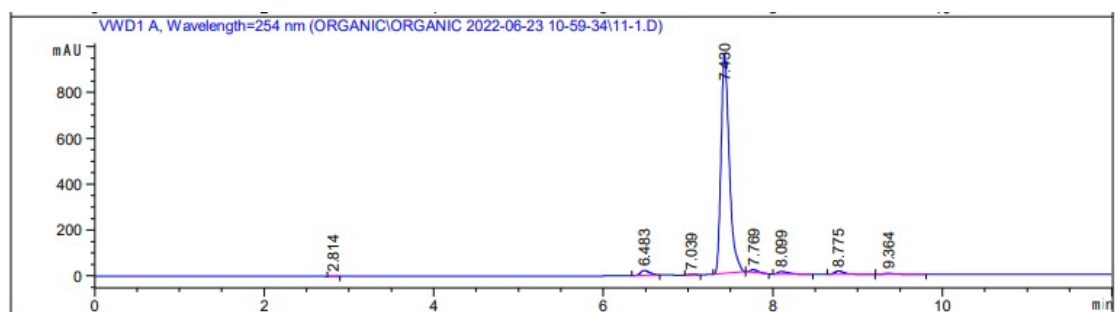

HPLC purity of 10o

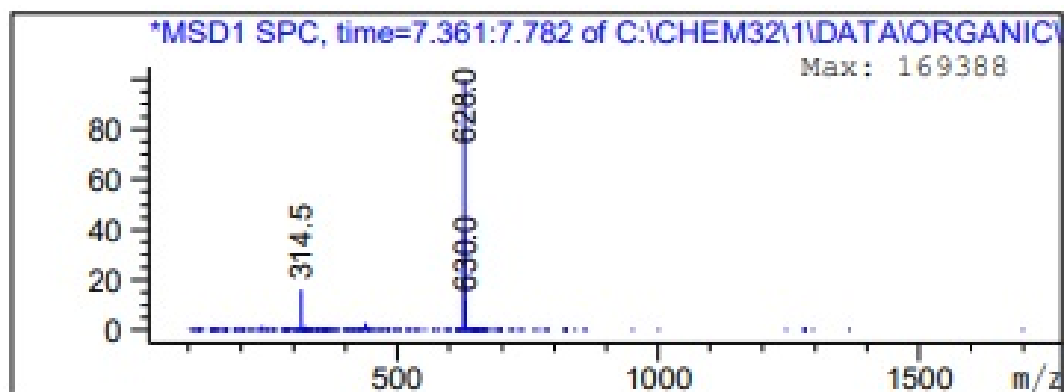

ESI-MS of 10o

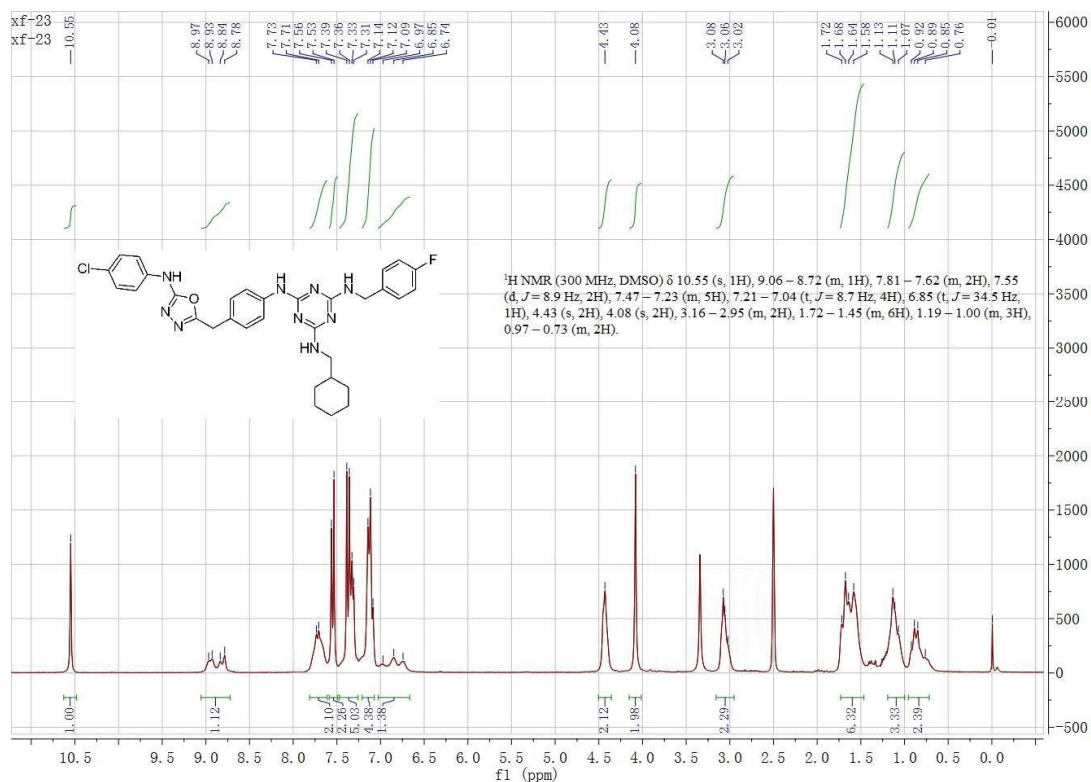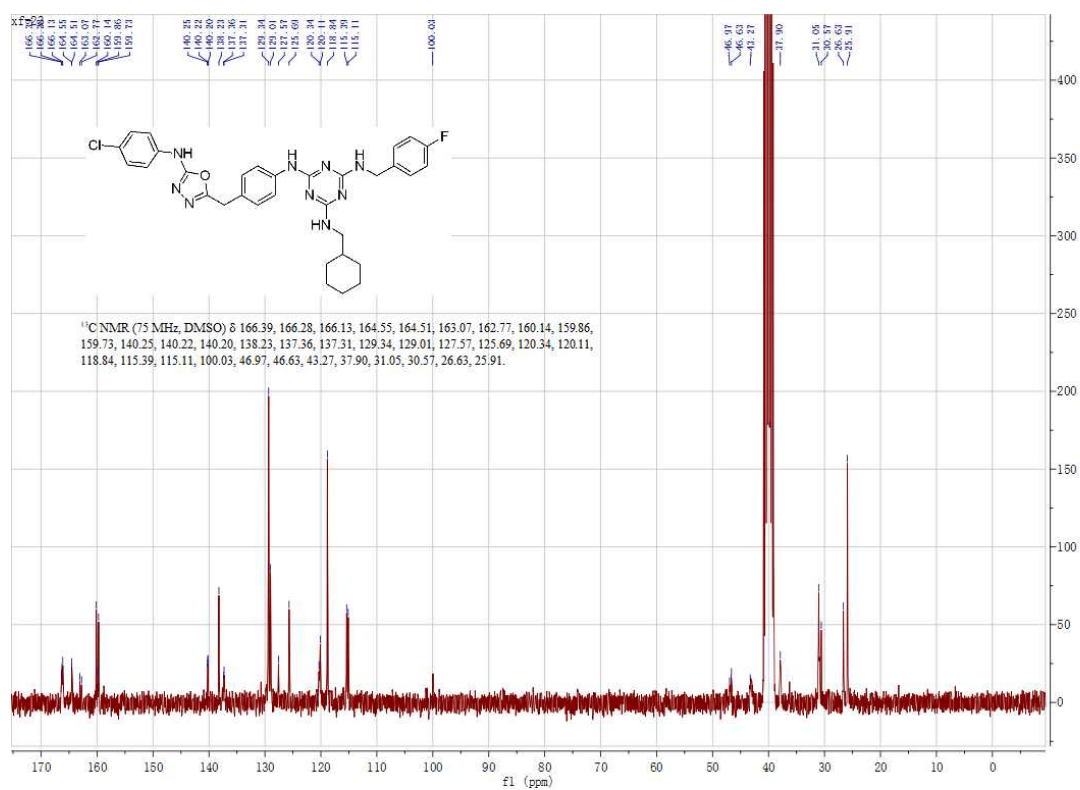

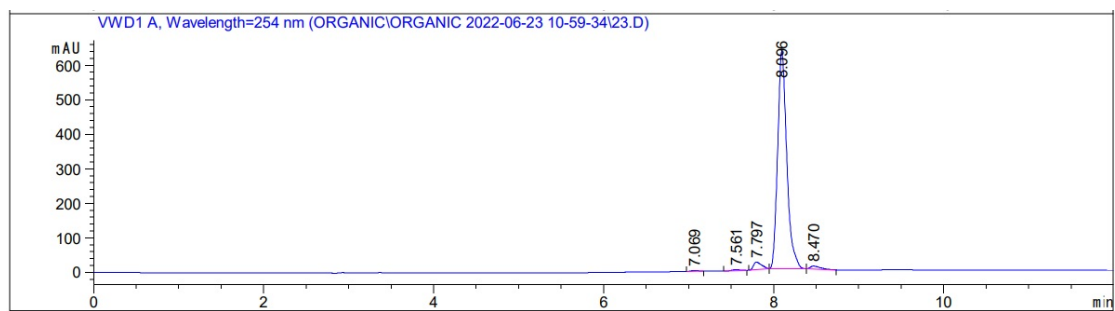

HPLC purity of 11c

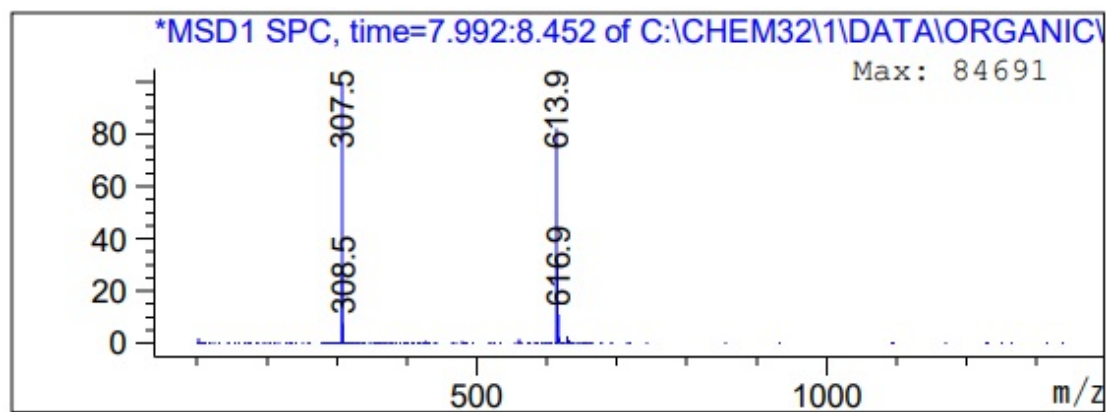

ESI-MS of 11c

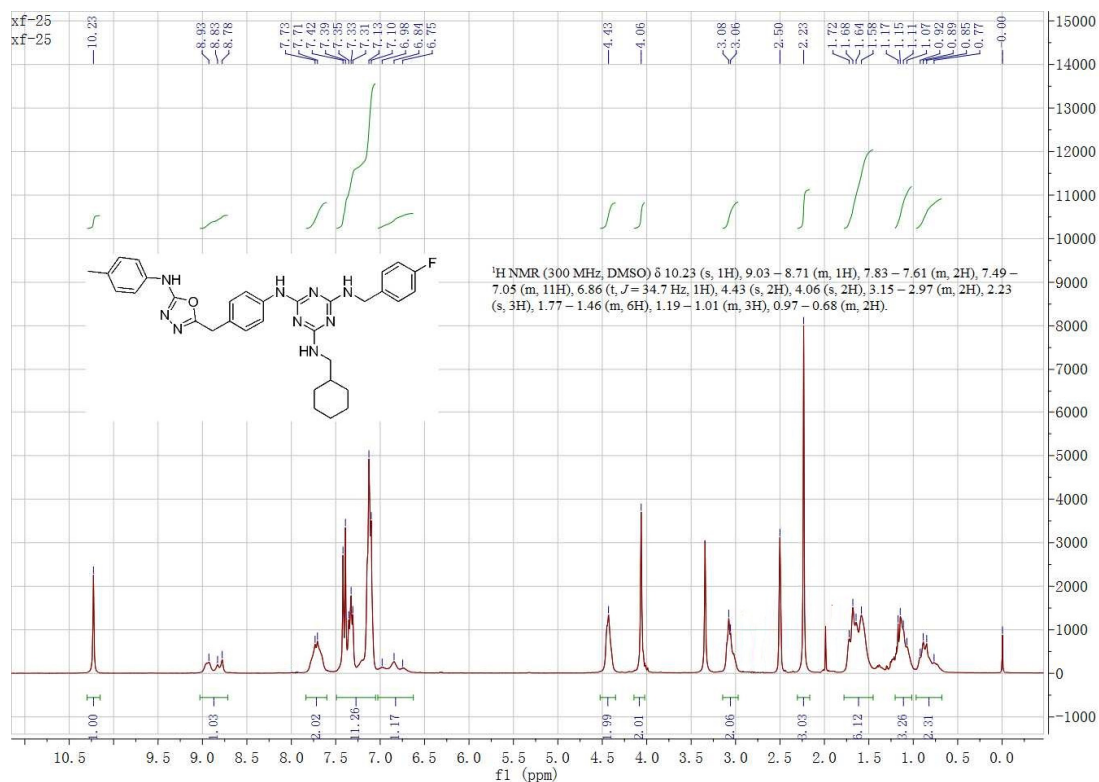

<sup>1</sup>H-NMR of 11i

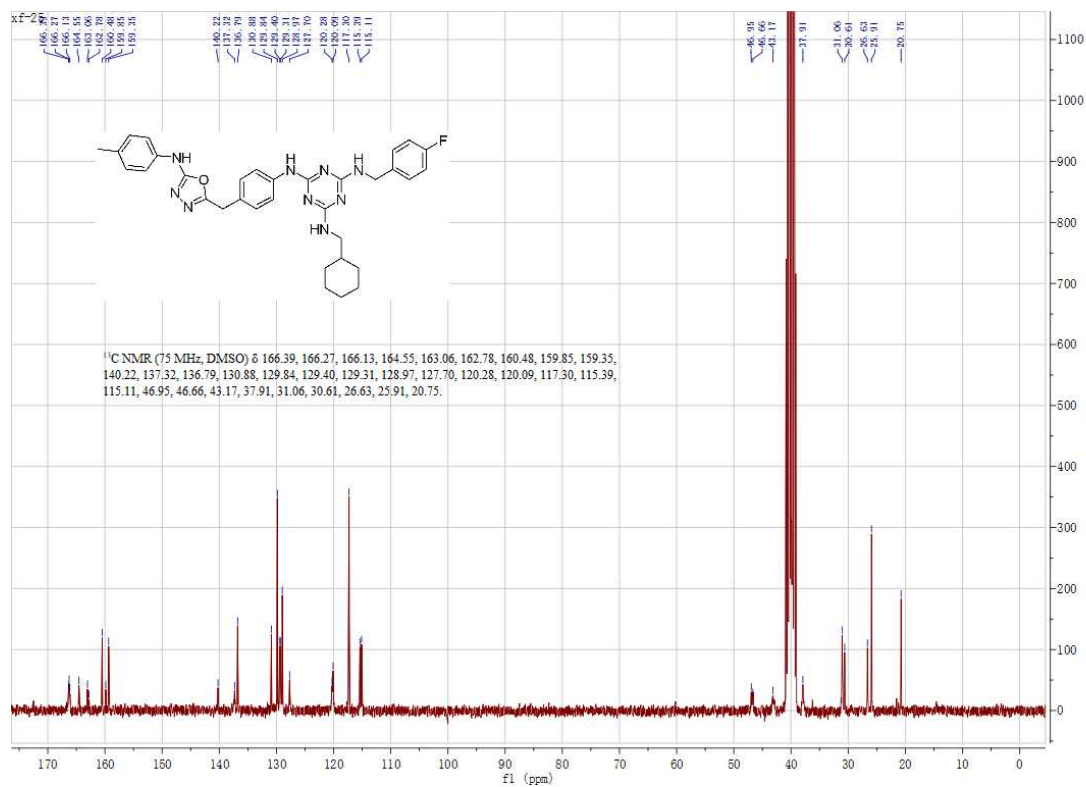

<sup>13</sup>C-NMR of 11i

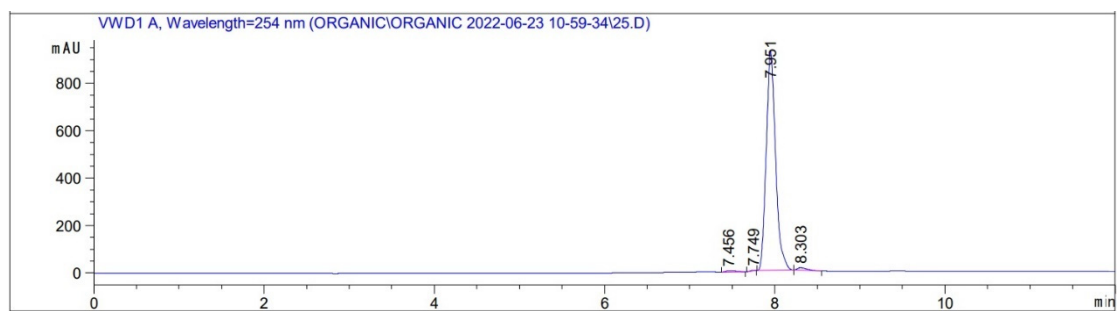

HPLC purity of 11i

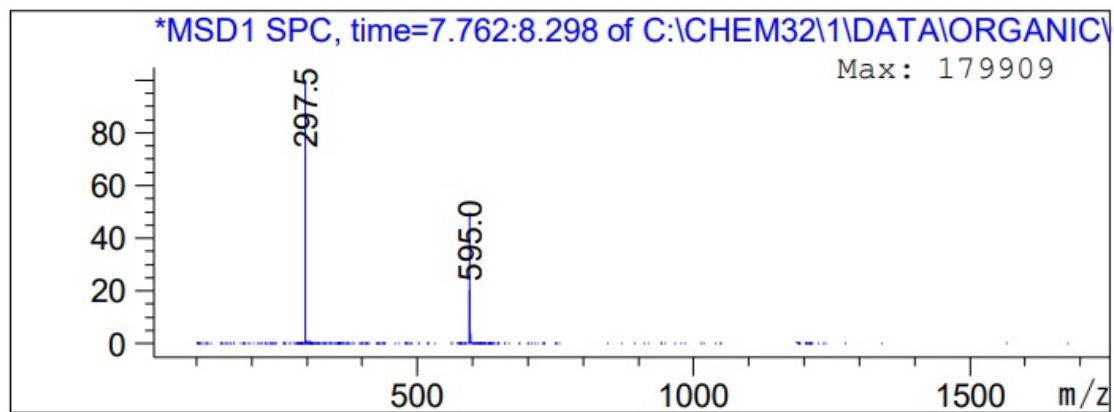

ESI-MS of 11i



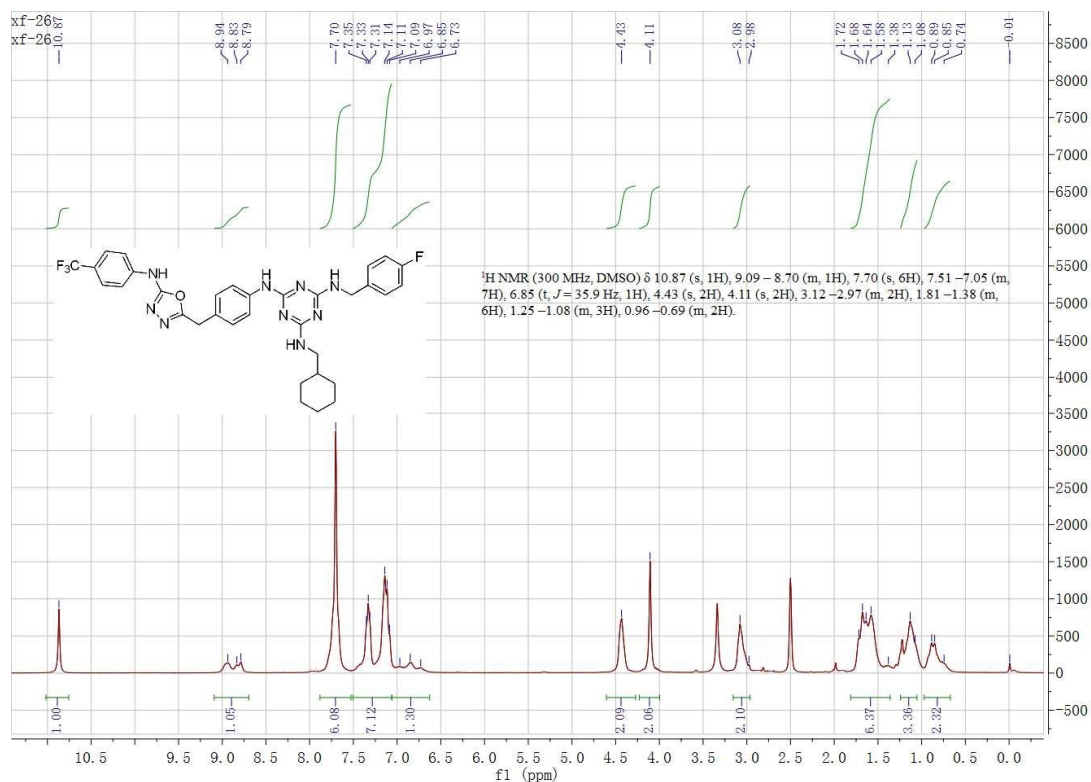

**$^1\text{H}$ -NMR of 11j**

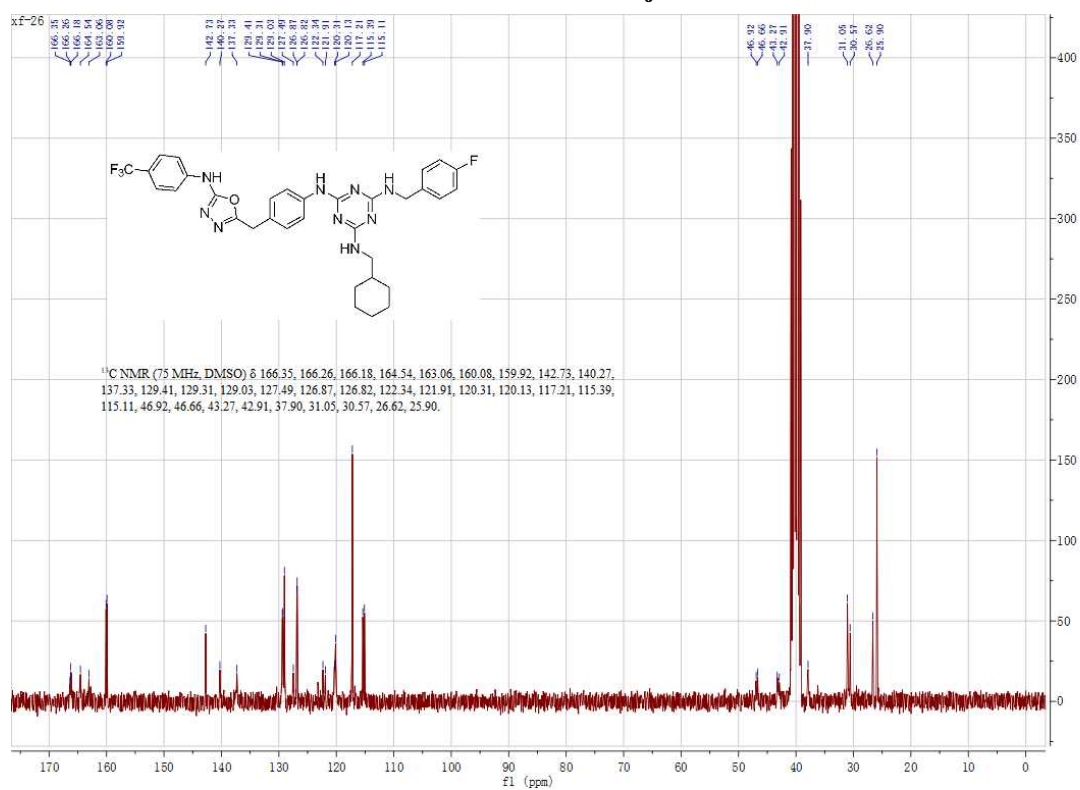

**$^{13}\text{C}$ -NMR of 11j**

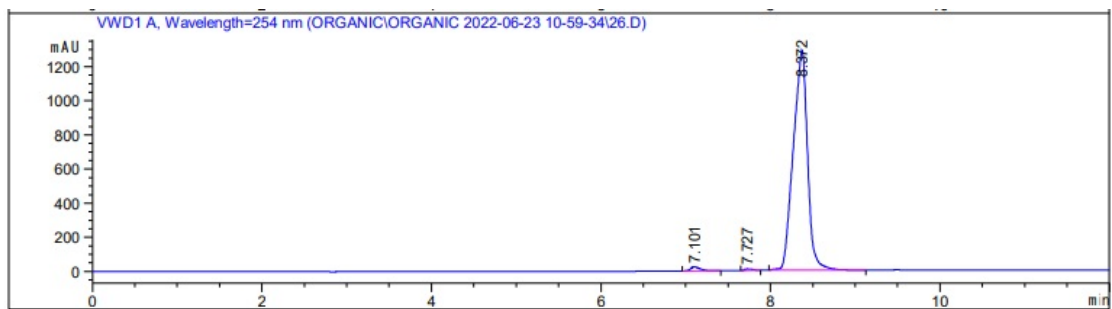

HPLC purity of 11j

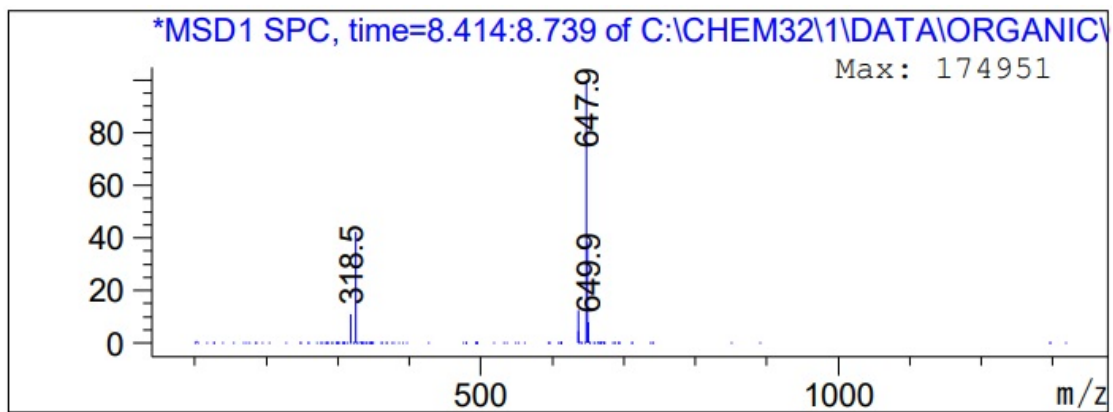

ESI-MS of 11j
